# Supplementary material for: Regioselective CF2 functionalization of Sc3N@D3h(5)-C78
Source: Royal Society of Chemistry journal article supplement (doi:10.1039/d1dt04031f), 2021-12-20
Supplement: d1dt04031f1.pdf [file d1dt04031f1.pdf]

## Regioselective CF<sub>2</sub> functionalization of Sc<sub>3</sub>N@D<sub>3h</sub>(5)-C<sub>78</sub>

Anastasia D. Pykhova, Olesya O. Semivrazhskaya, Nataliya A. Samoylova, Alexey A. Popov, Ilya N. Ioffe and Alexey A. Goryunkov

### Supplementary information

Optimized PBE/Def2-TZVP coordinates of the isomers of Sc<sub>3</sub>N@C<sub>78</sub>(CF<sub>2</sub>) (pp. 2-25), of the respective anionic intermediates (pp. 26-40) and transition states for ring closure (pp. 41-61), and the optimized coordinates of the starting Sc<sub>3</sub>N@C<sub>78</sub> and the reference [6,6]-Sc<sub>3</sub>N@C<sub>80</sub>(CF<sub>2</sub>) and Sc<sub>3</sub>N@C<sub>80</sub> compounds (pp. 62-67).

## Optimized isomers of Sc<sub>3</sub>N@C<sub>78</sub>

### 56-1

|    |              |              |              |
|----|--------------|--------------|--------------|
| N  | 0.010133020  | 0.006937260  | -0.029349260 |
| Sc | 2.018994720  | 0.037922270  | -0.005960530 |
| Sc | -1.020006900 | -1.717977550 | -0.001512150 |
| Sc | -0.994241640 | 1.745562500  | -0.043177210 |
| C  | 3.622641650  | 1.419485770  | -1.204241140 |
| C  | 3.144941000  | 0.738358420  | -2.395359240 |
| C  | 2.190621680  | 1.425077470  | -3.206162150 |
| C  | 1.245578120  | 0.698152400  | -4.007447170 |
| C  | 1.246496490  | -0.706046200 | -4.001776290 |
| C  | 4.158797310  | 0.743815840  | -0.033468050 |
| C  | 4.144029890  | -0.697812760 | -0.016320320 |
| C  | 3.606466500  | -1.391631540 | -1.174325700 |
| C  | 3.142151750  | -0.730412230 | -2.382903920 |
| C  | 2.190059200  | -1.425245590 | -3.189130970 |
| C  | 2.223332140  | 1.465676470  | 3.135666190  |
| C  | 3.180195470  | 0.777456760  | 2.337721140  |
| C  | 3.644656280  | 1.441087230  | 1.134211430  |
| C  | -1.217806180 | 0.716961850  | -4.006320380 |
| C  | -1.216817260 | -0.724482970 | -4.003032100 |
| C  | -0.002649050 | 1.418986250  | -4.008495880 |
| C  | -0.000730130 | -1.426627820 | -3.999504700 |
| C  | 0.153281810  | -2.601944420 | -3.185340890 |
| C  | -0.921995390 | -3.078493440 | -2.375394180 |
| C  | -0.577803580 | -3.809231230 | -1.166642770 |
| C  | 2.888870620  | -2.555242930 | -0.700394080 |
| C  | 1.835805050  | -3.157664610 | -1.454977080 |
| C  | 1.528079730  | -2.629021920 | -2.720646540 |
| C  | 0.789998160  | -3.767884610 | -0.696540690 |
| C  | -3.015149720 | 2.428036850  | -1.195186930 |
| C  | -2.195534780 | 2.349415360  | -2.393534650 |
| C  | -2.316494310 | 1.175869240  | -3.201649650 |
| C  | -3.035160430 | 0.000401700  | -2.743302650 |
| C  | -3.689905580 | -1.216530160 | -0.739534950 |
| C  | -3.669388980 | 0.004593700  | -1.491530850 |
| C  | -3.684741030 | 1.227876320  | -0.741657470 |
| C  | -2.195815980 | -2.347248850 | -2.385468090 |
| C  | -2.316170670 | -1.178689900 | -3.197649480 |
| C  | -3.021339130 | -2.419046510 | -1.192039930 |
| C  | -0.924044400 | 3.083980230  | -2.395799070 |
| C  | 0.150816860  | 2.601303390  | -3.206150570 |
| C  | -2.681336520 | 3.224400230  | -0.020827110 |
| C  | -1.432904230 | 3.945739010  | -0.023097850 |
| C  | -0.579493500 | 3.835346350  | -1.199670720 |
| C  | -3.000959040 | 2.415044170  | 1.147571830  |
| C  | -2.166295740 | 2.321932280  | 2.337539230  |

|   |              |              |              |
|---|--------------|--------------|--------------|
| C | -2.268972180 | 1.150453740  | 3.143696450  |
| C | -3.699353440 | -1.216753880 | 0.687133360  |
| C | -3.668777440 | 0.008812720  | 1.433267420  |
| C | -3.680956000 | 1.226097910  | 0.684269460  |
| C | -3.022781840 | 0.007355520  | 2.677278160  |
| C | 0.795926620  | 3.816549210  | -0.749879320 |
| C | 1.845966720  | 3.191044650  | -1.501655560 |
| C | 1.529381520  | 2.637482420  | -2.751664600 |
| C | 2.916140770  | 2.600072800  | -0.751649130 |
| C | 0.799485570  | 3.814592150  | 0.676049830  |
| C | 1.532043890  | 2.638884850  | 2.668942770  |
| C | 1.850018670  | 3.197220420  | 1.423148560  |
| C | 2.925024370  | 2.610420470  | 0.674982200  |
| C | -0.901864100 | 3.052443910  | 2.335223820  |
| C | -0.568895320 | 3.820177550  | 1.143123950  |
| C | 0.166510700  | 2.557524430  | 3.139234920  |
| C | -1.306050290 | -0.786819370 | 4.033184230  |
| C | -1.184828880 | 0.665084010  | 3.984347890  |
| C | 0.047808190  | 1.377202930  | 3.982065550  |
| C | -0.266618270 | -1.704679380 | 4.295509590  |
| C | -3.044405920 | -2.423443730 | 1.146485920  |
| C | -2.234242340 | -2.350702650 | 2.347674350  |
| C | -2.350411660 | -1.176768930 | 3.144073150  |
| C | -0.594278780 | -3.789470980 | 1.166672570  |
| C | -1.444195380 | -3.926402100 | -0.005984730 |
| C | -2.700507380 | -3.219084100 | -0.020808910 |
| C | 0.093345880  | -2.610431690 | 3.235974220  |
| C | -0.949517900 | -3.051377680 | 2.352791960  |
| C | 2.875500910  | -2.530741990 | 0.730181010  |
| C | 1.490417050  | -2.546311050 | 2.781872630  |
| C | 1.801606660  | -3.089034600 | 1.501869160  |
| C | 0.779388000  | -3.741673970 | 0.734029120  |
| C | 1.366320540  | 0.757090380  | 4.028237230  |
| C | 1.643084880  | -0.601416020 | 4.292019350  |
| C | 2.245140300  | -1.367363240 | 3.232093600  |
| C | 3.145432840  | -0.685475440 | 2.345166510  |
| C | 3.604282330  | -1.363927220 | 1.158971410  |
| C | 0.805261490  | -1.352609950 | 5.251020160  |
| F | 0.362210280  | -0.582498580 | 6.296957120  |
| F | 1.442489180  | -2.453950070 | 5.787022430  |

## 56-2

|    |              |              |              |
|----|--------------|--------------|--------------|
| N  | -0.000173880 | 0.010996880  | 0.040959910  |
| Sc | 1.993308900  | 0.142143150  | 0.160709180  |
| Sc | -0.968324240 | -1.767369340 | -0.007452610 |
| Sc | -1.064569070 | 1.727059700  | -0.002929590 |

|   |              |              |              |
|---|--------------|--------------|--------------|
| C | 3.574976990  | 1.414992040  | -1.137372190 |
| C | 3.109008790  | 0.713892670  | -2.308602260 |
| C | 2.183492370  | 1.410343080  | -3.147710350 |
| C | 1.246751650  | 0.692937330  | -3.958508530 |
| C | 1.245127590  | -0.708211150 | -3.942282010 |
| C | 4.127220190  | 0.760226190  | 0.025168850  |
| C | 4.171604300  | -0.676000230 | 0.071250170  |
| C | 3.571679550  | -1.434851150 | -1.033764750 |
| C | 3.096446700  | -0.752939760 | -2.254368200 |
| C | 2.167805420  | -1.427815390 | -3.100989310 |
| C | 2.165342510  | 1.474889280  | 3.166115790  |
| C | 3.143738810  | 0.805371130  | 2.379272050  |
| C | 3.645802750  | 1.483383050  | 1.199110230  |
| C | -1.217512310 | 0.722605520  | -3.989105730 |
| C | -1.221276010 | -0.718785000 | -3.986764180 |
| C | -0.000254100 | 1.419511630  | -3.981059630 |
| C | -0.005332260 | -1.423073140 | -3.966380010 |
| C | 0.130370270  | -2.598479920 | -3.153961320 |
| C | -0.957111770 | -3.084021820 | -2.369030430 |
| C | -0.624857330 | -3.848484340 | -1.178647570 |
| C | 2.924707120  | -2.695284450 | -0.657808560 |
| C | 1.801158050  | -3.178581270 | -1.416981850 |
| C | 1.494595070  | -2.624543010 | -2.661793510 |
| C | 0.745169670  | -3.842643780 | -0.710876850 |
| C | -3.031820590 | 2.440965700  | -1.190955910 |
| C | -2.202819210 | 2.358059970  | -2.384184700 |
| C | -2.320373110 | 1.184267870  | -3.189815720 |
| C | -3.045380720 | 0.010437800  | -2.735572190 |
| C | -3.709120280 | -1.202046870 | -0.728889680 |
| C | -3.682046580 | 0.014806890  | -1.483722140 |
| C | -3.691686520 | 1.237263670  | -0.732492280 |
| C | -2.220381930 | -2.338728190 | -2.377612660 |
| C | -2.329687550 | -1.169132230 | -3.190996570 |
| C | -3.041051560 | -2.402139770 | -1.182541710 |
| C | -0.928491670 | 3.087576990  | -2.379605790 |
| C | 0.150193630  | 2.603560280  | -3.183148710 |
| C | -2.710499070 | 3.244956500  | -0.019476420 |
| C | -1.453977830 | 3.951455040  | -0.016508530 |
| C | -0.591759020 | 3.836148500  | -1.181996530 |
| C | -3.040288590 | 2.445569150  | 1.153320990  |
| C | -2.218484520 | 2.369998990  | 2.352375910  |
| C | -2.333403810 | 1.194794210  | 3.158397940  |
| C | -3.709645160 | -1.201074060 | 0.698471240  |
| C | -3.685362650 | 0.018028470  | 1.449113200  |
| C | -3.695562510 | 1.239379790  | 0.695102850  |
| C | -3.051418220 | 0.017901840  | 2.701902300  |
| C | 0.779344800  | 3.834347850  | -0.722245830 |
| C | 1.826005200  | 3.199226680  | -1.464626930 |
| C | 1.523454450  | 2.632185040  | -2.709942070 |

|   |              |              |              |
|---|--------------|--------------|--------------|
| C | 2.879281590  | 2.599451580  | -0.699743250 |
| C | 0.776204810  | 3.842523560  | 0.704901370  |
| C | 1.502265350  | 2.686022320  | 2.719118240  |
| C | 1.825304440  | 3.233522960  | 1.468184030  |
| C | 2.901789260  | 2.633213020  | 0.726946660  |
| C | -0.948615100 | 3.106352770  | 2.356139330  |
| C | -0.600111700 | 3.845727800  | 1.155118140  |
| C | 0.125076510  | 2.635129890  | 3.172385990  |
| C | -1.217779450 | -0.703000810 | 3.941338940  |
| C | -1.229778030 | 0.736852690  | 3.956833900  |
| C | -0.018645080 | 1.442574750  | 3.962958620  |
| C | 0.004302990  | -1.397427410 | 3.911346590  |
| C | -3.038978600 | -2.399989050 | 1.154984980  |
| C | -2.215801470 | -2.329267390 | 2.350190780  |
| C | -2.328716110 | -1.157596060 | 3.155060160  |
| C | -0.633970660 | -3.839724470 | 1.159171530  |
| C | -1.489339960 | -3.950685130 | -0.012137540 |
| C | -2.717634650 | -3.202112790 | -0.014040590 |
| C | 0.157132380  | -2.570451160 | 3.105202420  |
| C | -0.946743160 | -3.066551810 | 2.342037080  |
| C | 3.045297720  | -3.129719390 | 0.703541160  |
| C | 1.544850690  | -2.634993250 | 2.651247000  |
| C | 1.842208490  | -3.346402460 | 1.458812120  |
| C | 0.732479980  | -3.852734170 | 0.712702730  |
| C | 1.233141590  | 0.726305060  | 3.949683490  |
| C | 1.249475150  | -0.680845730 | 3.905683580  |
| C | 2.210506340  | -1.402373530 | 3.109881950  |
| C | 3.233946120  | -0.656562680 | 2.404172890  |
| C | 4.077212620  | -1.268527310 | 1.397566160  |
| C | 4.284555430  | -2.734669520 | 1.413491960  |
| F | 4.395840860  | -3.268244800 | 2.671592940  |
| F | 5.423573370  | -3.095677360 | 0.716992340  |

### 56-3

|    |              |              |              |
|----|--------------|--------------|--------------|
| N  | -0.035535870 | 0.046343940  | -0.002080420 |
| Sc | 1.934703330  | 0.206814170  | -0.003310890 |
| Sc | -0.957115580 | -1.725062160 | -0.003234070 |
| Sc | -1.091011340 | 1.744916600  | 0.000351370  |
| C  | 3.602420400  | 1.351880070  | -1.177909420 |
| C  | 3.092468320  | 0.703304710  | -2.369205760 |
| C  | 2.160411090  | 1.418504430  | -3.186674770 |
| C  | 1.213476700  | 0.718623330  | -4.005823670 |
| C  | 1.205213180  | -0.684010450 | -4.027535800 |
| C  | 4.102636230  | 0.626691340  | -0.006272230 |
| C  | 4.028418220  | -0.824467050 | -0.007626130 |
| C  | 3.588498370  | -1.494095230 | -1.236630530 |
| C  | 3.069489070  | -0.753550390 | -2.377032270 |

|   |              |              |              |
|---|--------------|--------------|--------------|
| C | 2.148453550  | -1.424927390 | -3.236522580 |
| C | 2.167504810  | 1.412228890  | 3.179970740  |
| C | 3.097926820  | 0.698710300  | 2.359099570  |
| C | 3.605400580  | 1.349738410  | 1.168029590  |
| C | -1.252408330 | 0.757708510  | -3.996430930 |
| C | -1.260212010 | -0.684638910 | -4.004371250 |
| C | -0.030743050 | 1.449849810  | -3.995547030 |
| C | -0.049640890 | -1.391008880 | -4.019724430 |
| C | 0.104937420  | -2.561802310 | -3.203153450 |
| C | -0.938216840 | -3.045806990 | -2.372728810 |
| C | -0.547783850 | -3.778687820 | -1.171803890 |
| C | 3.184903490  | -2.871563670 | -1.105385190 |
| C | 1.885555670  | -3.253141250 | -1.596760000 |
| C | 1.479290820  | -2.622681900 | -2.779001560 |
| C | 0.843569460  | -3.776601230 | -0.733073540 |
| C | -3.037445980 | 2.468229120  | -1.169166020 |
| C | -2.214125870 | 2.384887730  | -2.367976540 |
| C | -2.341115710 | 1.213508380  | -3.176566080 |
| C | -3.056657740 | 0.033842810  | -2.717192230 |
| C | -3.692244480 | -1.189836440 | -0.711645590 |
| C | -3.679562390 | 0.032694890  | -1.461186640 |
| C | -3.688802270 | 1.257956110  | -0.710110710 |
| C | -2.209988760 | -2.313193840 | -2.368326140 |
| C | -2.345051520 | -1.143587780 | -3.184295410 |
| C | -3.012342080 | -2.384592430 | -1.167157620 |
| C | -0.933640370 | 3.105007310  | -2.368068340 |
| C | 0.134931300  | 2.622628300  | -3.183996750 |
| C | -2.707978090 | 3.272035960  | 0.003927090  |
| C | -1.435371150 | 3.963043240  | 0.003197300  |
| C | -0.577471070 | 3.836382960  | -1.165650090 |
| C | -3.034788630 | 2.465848650  | 1.176106510  |
| C | -2.208817950 | 2.380158160  | 2.372925410  |
| C | -2.334031690 | 1.207219270  | 3.179501620  |
| C | -3.690644750 | -1.191239930 | 0.712830240  |
| C | -3.676284150 | 0.029796630  | 1.464756380  |
| C | -3.687197490 | 1.256527860  | 0.716124750  |
| C | -3.050576630 | 0.028467020  | 2.719370170  |
| C | 0.798661720  | 3.798956050  | -0.711996760 |
| C | 1.837381240  | 3.160376880  | -1.465657260 |
| C | 1.514293780  | 2.633475160  | -2.722930670 |
| C | 2.895628500  | 2.528719380  | -0.716397600 |
| C | 0.800260510  | 3.797532300  | 0.713067980  |
| C | 1.520356240  | 2.628135740  | 2.720117160  |
| C | 1.840672730  | 3.157520150  | 1.463180690  |
| C | 2.897332010  | 2.527378360  | 0.710365430  |
| C | -0.928355410 | 3.100290780  | 2.371610080  |
| C | -0.574864860 | 3.834002380  | 1.169840760  |
| C | 0.142020750  | 2.616358330  | 3.184230100  |
| C | -1.251280650 | -0.692548320 | 4.001147750  |

|   |              |              |              |
|---|--------------|--------------|--------------|
| C | -1.243496360 | 0.749808330  | 3.996043870  |
| C | -0.021839620 | 1.441963720  | 3.993802800  |
| C | -0.040675530 | -1.398941170 | 4.012404620  |
| C | -3.009687330 | -2.386856080 | 1.164455130  |
| C | -2.204684100 | -2.317841260 | 2.363979560  |
| C | -2.337940830 | -1.149877000 | 3.182572040  |
| C | -0.545159410 | -3.780898230 | 1.160834250  |
| C | -1.406439150 | -3.903152470 | -0.004626350 |
| C | -2.663603100 | -3.184541990 | -0.002518870 |
| C | 0.112081980  | -2.568095620 | 3.193151960  |
| C | -0.932907240 | -3.050435610 | 2.364093840  |
| C | 3.187441590  | -2.873762140 | 1.087971950  |
| C | 1.485479910  | -2.628110990 | 2.765787990  |
| C | 1.889119480  | -3.256221260 | 1.581393500  |
| C | 0.845203940  | -3.777970660 | 0.718996080  |
| C | 1.222403880  | 0.710722810  | 3.999831670  |
| C | 1.214192040  | -0.691954910 | 4.018809780  |
| C | 2.155652370  | -1.431276870 | 3.224202930  |
| C | 3.074851990  | -0.758196570 | 2.364030660  |
| C | 3.591437930  | -1.496565420 | 1.221102030  |
| C | 3.815444990  | -3.633048590 | -0.010183950 |
| F | 5.194791750  | -3.551231710 | -0.011725030 |
| F | 3.481174230  | -4.965808960 | -0.011144520 |

#### 56-4

|    |              |              |              |
|----|--------------|--------------|--------------|
| N  | 0.109640940  | -0.013443860 | 0.075540180  |
| Sc | 2.128088820  | -0.255035280 | 0.167513010  |
| Sc | -1.012608720 | -1.701717630 | 0.017479570  |
| Sc | -0.843614750 | 1.782352790  | 0.003982240  |
| C  | 3.555919530  | 1.437084650  | -1.217091180 |
| C  | 3.116924510  | 0.771573010  | -2.419803280 |
| C  | 2.167418640  | 1.456933320  | -3.226627570 |
| C  | 1.218902170  | 0.725519630  | -4.020343230 |
| C  | 1.225433200  | -0.679138890 | -4.005236820 |
| C  | 4.166105360  | 0.764970690  | -0.107694270 |
| C  | 4.506392930  | -0.622323250 | -0.302589970 |
| C  | 3.683204980  | -1.368853400 | -1.235372050 |
| C  | 3.115731980  | -0.691778900 | -2.397230070 |
| C  | 2.169122600  | -1.384818810 | -3.186370030 |
| C  | 2.171232560  | 1.388002810  | 3.144711860  |
| C  | 3.161317920  | 0.687128610  | 2.360539190  |
| C  | 3.626122850  | 1.367485240  | 1.129995290  |
| C  | -1.242785170 | 0.726387970  | -4.001342400 |
| C  | -1.235606110 | -0.716077860 | -3.995633630 |
| C  | -0.032140130 | 1.438202880  | -4.009377860 |
| C  | -0.015129620 | -1.409653200 | -3.988858350 |
| C  | 0.151325560  | -2.577113630 | -3.166769350 |

|   |              |              |              |
|---|--------------|--------------|--------------|
| C | -0.922549290 | -3.057857140 | -2.362744100 |
| C | -0.568313220 | -3.785968630 | -1.161919360 |
| C | 2.960153820  | -2.517688960 | -0.678206600 |
| C | 1.859622640  | -3.106388280 | -1.431286550 |
| C | 1.528109850  | -2.588745550 | -2.695389760 |
| C | 0.803074930  | -3.741279000 | -0.696282840 |
| C | -3.012020450 | 2.399501160  | -1.171136000 |
| C | -2.210270580 | 2.341108930  | -2.373713730 |
| C | -2.339605200 | 1.177130900  | -3.191742650 |
| C | -3.052881800 | 0.001649900  | -2.726778080 |
| C | -3.693860040 | -1.218755300 | -0.719309330 |
| C | -3.686328690 | 0.001542540  | -1.471784710 |
| C | -3.711881890 | 1.218076750  | -0.719665830 |
| C | -2.201804910 | -2.338975960 | -2.370624640 |
| C | -2.330163640 | -1.172592530 | -3.182553120 |
| C | -3.022510160 | -2.415929120 | -1.173843400 |
| C | -0.948335750 | 3.088691000  | -2.379689620 |
| C | 0.122617840  | 2.615786200  | -3.196923010 |
| C | -2.667575950 | 3.187717210  | -0.005647840 |
| C | -1.448574390 | 3.945578370  | -0.004576070 |
| C | -0.600945810 | 3.842880190  | -1.182537010 |
| C | -3.011549350 | 2.399096240  | 1.159617940  |
| C | -2.204813180 | 2.338600400  | 2.358875310  |
| C | -2.340167430 | 1.177188210  | 3.178796230  |
| C | -3.699402370 | -1.219125620 | 0.708233310  |
| C | -3.691786850 | 0.002960140  | 1.459917130  |
| C | -3.713716200 | 1.218482550  | 0.707622730  |
| C | -3.062795940 | 0.004585280  | 2.717086900  |
| C | 0.769496640  | 3.805351900  | -0.726984070 |
| C | 1.817813250  | 3.192920170  | -1.484431000 |
| C | 1.503544420  | 2.655733770  | -2.745708250 |
| C | 2.876409380  | 2.599877220  | -0.733444100 |
| C | 0.781444510  | 3.788588510  | 0.700965000  |
| C | 1.516378770  | 2.596410930  | 2.691629410  |
| C | 1.834132990  | 3.144584150  | 1.442063970  |
| C | 2.898220560  | 2.557939010  | 0.692140150  |
| C | -0.935112940 | 3.075454780  | 2.359097820  |
| C | -0.588613260 | 3.833002840  | 1.166115960  |
| C | 0.138676600  | 2.586001510  | 3.161296040  |
| C | -1.261834960 | -0.719800850 | 3.999092190  |
| C | -1.245883810 | 0.722112320  | 3.988202070  |
| C | -0.023723920 | 1.420729420  | 3.979409250  |
| C | -0.052908950 | -1.427340290 | 4.008700780  |
| C | -3.033671030 | -2.417594760 | 1.166516430  |
| C | -2.226477250 | -2.343666920 | 2.372916900  |
| C | -2.355377120 | -1.173393500 | 3.182946090  |
| C | -0.594526020 | -3.800494590 | 1.175162800  |
| C | -1.435511680 | -3.915814420 | -0.000448010 |
| C | -2.693611290 | -3.213287930 | -0.004965220 |



|   |              |              |             |
|---|--------------|--------------|-------------|
| C | 0.110076640  | -2.609053670 | 3.207189180 |
| C | -0.955495500 | -3.076278790 | 2.380986050 |
| C | 2.937957890  | -2.578961360 | 0.773459330 |
| C | 1.494302070  | -2.644181900 | 2.761951490 |
| C | 1.809724700  | -3.137287660 | 1.484981680 |
| C | 0.779005800  | -3.753563100 | 0.725880050 |
| C | 1.219378010  | 0.694114040  | 3.976152860 |
| C | 1.193432530  | -0.705615740 | 4.009622870 |
| C | 2.141185460  | -1.432140560 | 3.238096670 |
| C | 3.168761160  | -0.791753760 | 2.493063140 |
| C | 3.788255320  | -1.650516800 | 1.492162470 |
| C | 5.087047770  | -1.352082780 | 0.848100850 |
| F | 5.910957340  | -0.570773940 | 1.616647690 |
| F | 5.787881170  | -2.484005780 | 0.493390790 |

### 56-5

|    |              |              |              |
|----|--------------|--------------|--------------|
| N  | -0.015440290 | 0.000615450  | -0.009929650 |
| Sc | 1.989188540  | 0.024820480  | 0.015516360  |
| Sc | -0.959449840 | -1.777294190 | -0.008887590 |
| Sc | -1.022570280 | 1.740501900  | -0.016541370 |
| C  | 3.601457830  | 1.415827860  | -1.178299350 |
| C  | 3.121066390  | 0.742929460  | -2.367958570 |
| C  | 2.177274040  | 1.437604610  | -3.187161350 |
| C  | 1.232695230  | 0.716838280  | -3.995586270 |
| C  | 1.231799930  | -0.684949640 | -3.994507860 |
| C  | 4.128916310  | 0.734339110  | -0.003554250 |
| C  | 4.105687160  | -0.713375050 | 0.031874540  |
| C  | 3.560864560  | -1.389564160 | -1.135102350 |
| C  | 3.108939970  | -0.722845660 | -2.349453260 |
| C  | 2.168822020  | -1.408049100 | -3.177762870 |
| C  | 2.214446040  | 1.474458570  | 3.163880870  |
| C  | 3.168256780  | 0.793742870  | 2.351182420  |
| C  | 3.612893480  | 1.446452630  | 1.147949010  |
| C  | -1.231300800 | 0.738930660  | -4.001317210 |
| C  | -1.233866410 | -0.701078750 | -4.008939120 |
| C  | -0.014747750 | 1.439066440  | -3.998816070 |
| C  | -0.018125440 | -1.405014080 | -4.005706520 |
| C  | 0.130535390  | -2.587731490 | -3.204925880 |
| C  | -0.954901650 | -3.072730380 | -2.412142770 |
| C  | -0.619966530 | -3.830700440 | -1.221307750 |
| C  | 2.843244410  | -2.552714440 | -0.674229000 |
| C  | 1.808058360  | -3.154391010 | -1.469973720 |
| C  | 1.507933520  | -2.614176950 | -2.729351960 |
| C  | 0.746497930  | -3.786233500 | -0.758169770 |
| C  | -3.025123250 | 2.435388040  | -1.177042620 |
| C  | -2.206399960 | 2.363003270  | -2.377645270 |
| C  | -2.328030690 | 1.193722180  | -3.189425720 |
| C  | -3.049023460 | 0.018215620  | -2.736939160 |

|   |              |              |              |
|---|--------------|--------------|--------------|
| C | -3.700389890 | -1.209369040 | -0.736304580 |
| C | -3.677919460 | 0.013445990  | -1.480377570 |
| C | -3.684795900 | 1.230384180  | -0.721378210 |
| C | -2.222332440 | -2.332634330 | -2.406924160 |
| C | -2.337202360 | -1.157703750 | -3.206024580 |
| C | -3.032844320 | -2.405433020 | -1.202450380 |
| C | -0.933966580 | 3.095918070  | -2.380114010 |
| C | 0.139995650  | 2.616846540  | -3.192043450 |
| C | -2.694609650 | 3.234159370  | -0.004774470 |
| C | -1.443496700 | 3.953295720  | -0.010673800 |
| C | -0.587620540 | 3.840645930  | -1.182701860 |
| C | -3.012362390 | 2.424956090  | 1.164980970  |
| C | -2.181108630 | 2.342884510  | 2.355437070  |
| C | -2.281697770 | 1.157736480  | 3.150033340  |
| C | -3.689596310 | -1.217730280 | 0.690942440  |
| C | -3.651555870 | -0.004312400 | 1.450338140  |
| C | -3.674942670 | 1.222584380  | 0.706467870  |
| C | -2.996121290 | -0.014513870 | 2.693699740  |
| C | 0.787571150  | 3.824755990  | -0.730792770 |
| C | 1.836926100  | 3.200763300  | -1.483887570 |
| C | 1.518996570  | 2.649459060  | -2.734915760 |
| C | 2.903844100  | 2.605369030  | -0.734584290 |
| C | 0.791194200  | 3.830432620  | 0.695928330  |
| C | 1.542133310  | 2.675546380  | 2.705251720  |
| C | 1.848201990  | 3.219084180  | 1.445905520  |
| C | 2.909318180  | 2.621195430  | 0.690091080  |
| C | -0.918278420 | 3.092536670  | 2.352527420  |
| C | -0.581987010 | 3.842788250  | 1.155023880  |
| C | 0.162061390  | 2.621197260  | 3.154789360  |
| C | -1.121024150 | -0.747965570 | 3.894471750  |
| C | -1.164680030 | 0.692355540  | 3.924599360  |
| C | 0.023765550  | 1.421430420  | 3.929211940  |
| C | 0.107706870  | -1.465471980 | 3.917313350  |
| C | -3.019018100 | -2.419533450 | 1.134000280  |
| C | -2.172838830 | -2.350288180 | 2.313759150  |
| C | -2.253764830 | -1.187161730 | 3.124726710  |
| C | -0.616911870 | -3.873125250 | 1.123534140  |
| C | -1.476417070 | -3.964042530 | -0.049043600 |
| C | -2.706525350 | -3.215241700 | -0.041055260 |
| C | 0.173912940  | -2.713684550 | 3.162950270  |
| C | -0.925041740 | -3.100733770 | 2.315833800  |
| C | 2.855993650  | -2.585853050 | 0.763351610  |
| C | 1.511885090  | -3.169455790 | 2.829380730  |
| C | 1.814435390  | -3.320862900 | 1.460329090  |
| C | 0.746659770  | -3.817452780 | 0.656631090  |
| C | 1.266474410  | 0.719184170  | 3.936280460  |
| C | 1.343180090  | -0.684057170 | 4.002668460  |
| C | 2.565768460  | -1.283035610 | 3.520593930  |
| C | 3.268575390  | -0.658864110 | 2.455886880  |

|   |             |              |             |
|---|-------------|--------------|-------------|
| C | 3.595495740 | -1.393120120 | 1.221767860 |
| C | 2.616228720 | -2.749450870 | 3.727984320 |
| F | 3.823774570 | -3.311699290 | 3.381113350 |
| F | 2.379475540 | -3.091810800 | 5.046363070 |

## 56-6

|    |              |              |              |
|----|--------------|--------------|--------------|
| N  | -0.008641610 | 0.014467140  | -0.041380400 |
| Sc | 1.996863440  | 0.045508970  | -0.025682700 |
| Sc | -0.984434630 | -1.738792910 | -0.071287170 |
| Sc | -1.025252130 | 1.745377640  | -0.009355430 |
| C  | 3.621378370  | 1.408262290  | -1.173774380 |
| C  | 3.149407190  | 0.740712420  | -2.377032540 |
| C  | 2.198532950  | 1.434798400  | -3.187396250 |
| C  | 1.256719300  | 0.717293350  | -4.001138850 |
| C  | 1.256121700  | -0.685949590 | -4.010341620 |
| C  | 4.135645880  | 0.717782430  | 0.002823440  |
| C  | 4.110736260  | -0.721634040 | 0.007581200  |
| C  | 3.599953190  | -1.400626470 | -1.175233700 |
| C  | 3.144517280  | -0.727071630 | -2.380472630 |
| C  | 2.196480450  | -1.413620750 | -3.202358360 |
| C  | 2.153578480  | 1.430086550  | 3.149557860  |
| C  | 3.090561930  | 0.716280610  | 2.355383460  |
| C  | 3.596326910  | 1.395467160  | 1.168817000  |
| C  | -1.208018750 | 0.738478070  | -4.005772810 |
| C  | -1.209184150 | -0.702628080 | -4.011872390 |
| C  | 0.008666640  | 1.438886360  | -4.002256150 |
| C  | 0.007073220  | -1.405356150 | -4.019493240 |
| C  | 0.157866930  | -2.590570560 | -3.223364640 |
| C  | -0.920435870 | -3.076556480 | -2.419515170 |
| C  | -0.577521270 | -3.834876270 | -1.232729830 |
| C  | 2.890853120  | -2.579814400 | -0.736864710 |
| C  | 1.842152460  | -3.180355570 | -1.504959980 |
| C  | 1.533729530  | -2.626047340 | -2.757880240 |
| C  | 0.794356250  | -3.820187820 | -0.768530430 |
| C  | -3.010358800 | 2.439976270  | -1.192460730 |
| C  | -2.188010450 | 2.364404050  | -2.389849740 |
| C  | -2.307481510 | 1.193565440  | -3.198862900 |
| C  | -3.022421700 | 0.014882380  | -2.740834830 |
| C  | -3.650694950 | -1.210443690 | -0.730443600 |
| C  | -3.643916110 | 0.010643900  | -1.482420620 |
| C  | -3.660334180 | 1.230623410  | -0.730677720 |
| C  | -2.189919560 | -2.338115560 | -2.402961780 |
| C  | -2.306933620 | -1.161062760 | -3.205296510 |
| C  | -3.006811910 | -2.415776150 | -1.198307980 |
| C  | -0.914963660 | 3.096370450  | -2.386643180 |
| C  | 0.161996940  | 2.616865270  | -3.193813750 |
| C  | -2.688859000 | 3.247744680  | -0.024661080 |

|   |              |              |              |
|---|--------------|--------------|--------------|
| C | -1.433599590 | 3.961801670  | -0.022298860 |
| C | -0.571546410 | 3.840481090  | -1.188295070 |
| C | -3.012587110 | 2.445524960  | 1.146702310  |
| C | -2.191776050 | 2.373910730  | 2.340356820  |
| C | -2.299141260 | 1.196500690  | 3.138350490  |
| C | -3.620215180 | -1.212437830 | 0.696204110  |
| C | -3.606597050 | 0.002262320  | 1.444959830  |
| C | -3.652326910 | 1.228716610  | 0.696133490  |
| C | -2.971285370 | -0.005127470 | 2.692443930  |
| C | 0.801491650  | 3.822001070  | -0.729100770 |
| C | 1.850678900  | 3.190378680  | -1.474460020 |
| C | 1.537430410  | 2.645520030  | -2.729093460 |
| C | 2.910096570  | 2.583806260  | -0.718431730 |
| C | 0.797920000  | 3.829551170  | 0.696727500  |
| C | 1.518931270  | 2.657357540  | 2.703485710  |
| C | 1.839788510  | 3.197162660  | 1.451202410  |
| C | 2.899436800  | 2.579687510  | 0.707756580  |
| C | -0.925988860 | 3.116686500  | 2.351637090  |
| C | -0.577690560 | 3.852951160  | 1.149400390  |
| C | 0.146073990  | 2.645607020  | 3.171732290  |
| C | -1.230757000 | -0.651384430 | 4.091853760  |
| C | -1.223046600 | 0.773516540  | 3.971188680  |
| C | -0.011392550 | 1.474368560  | 3.986009640  |
| C | -0.034633700 | -1.295842700 | 4.485847390  |
| C | -2.952508190 | -2.408803580 | 1.157154570  |
| C | -2.139891470 | -2.375324850 | 2.383067500  |
| C | -2.255655790 | -1.180743120 | 3.206158900  |
| C | -0.588451620 | -3.850526190 | 1.096378940  |
| C | -1.436398020 | -3.945408800 | -0.065198190 |
| C | -2.672080020 | -3.216212820 | -0.029652010 |
| C | 0.178929660  | -3.083711380 | 3.251511730  |
| C | -0.930575900 | -3.225582600 | 2.353193990  |
| C | 2.859944420  | -2.573893970 | 0.688769280  |
| C | 1.485176570  | -2.708681490 | 2.717381840  |
| C | 1.801430100  | -3.174004330 | 1.424291850  |
| C | 0.785828820  | -3.832429410 | 0.658900700  |
| C | 1.219378890  | 0.725109620  | 3.962640340  |
| C | 1.209228140  | -0.678860640 | 4.070092450  |
| C | 2.075959590  | -1.453681310 | 3.197063650  |
| C | 3.039735410  | -0.751247820 | 2.364258610  |
| C | 3.547884050  | -1.405234010 | 1.169392960  |
| C | -0.039731110 | -2.755412880 | 4.672150230  |
| F | 0.973238970  | -3.214746900 | 5.489440220  |
| F | -1.225270090 | -3.240986380 | 5.168691880  |

**66-1**

|   |             |             |              |
|---|-------------|-------------|--------------|
| N | 0.168472470 | 0.012489590 | -0.011071770 |
|---|-------------|-------------|--------------|

|    |              |              |              |
|----|--------------|--------------|--------------|
| Sc | 2.226097490  | 0.012577210  | -0.019694320 |
| Sc | -0.856499670 | -1.753997620 | -0.007257820 |
| Sc | -0.858371430 | 1.778144690  | -0.006796550 |
| C  | 3.691467440  | 1.533851720  | -1.207529170 |
| C  | 3.200105890  | 0.761140580  | -2.364030910 |
| C  | 2.200437780  | 1.431624260  | -3.156053040 |
| C  | 1.252752520  | 0.712259770  | -3.959533420 |
| C  | 1.252505110  | -0.686383730 | -3.959724890 |
| C  | 4.408430690  | 1.091661750  | -0.028826940 |
| C  | 4.407814120  | -1.067976660 | -0.029173450 |
| C  | 3.690772880  | -1.509612430 | -1.207992700 |
| C  | 3.199768510  | -0.736390800 | -2.364231560 |
| C  | 2.199972520  | -1.406323940 | -3.156539520 |
| C  | 2.226742800  | 1.430581110  | 3.116920480  |
| C  | 3.219733850  | 0.760357050  | 2.316315040  |
| C  | 3.701418390  | 1.533485870  | 1.156019510  |
| C  | -1.216056180 | 0.732375700  | -3.988954920 |
| C  | -1.216303040 | -0.705666230 | -3.989169530 |
| C  | 0.001319610  | 1.432675670  | -3.981360190 |
| C  | 0.000821880  | -1.406365300 | -3.981751950 |
| C  | 0.147677220  | -2.588195560 | -3.186601010 |
| C  | -0.931264690 | -3.070079930 | -2.376962070 |
| C  | -0.597531400 | -3.832471440 | -1.183568680 |
| C  | 2.878247440  | -2.609892640 | -0.733981790 |
| C  | 1.814419530  | -3.183023700 | -1.478866110 |
| C  | 1.524585390  | -2.624220580 | -2.726015520 |
| C  | 0.770794470  | -3.810793060 | -0.728000010 |
| C  | -3.000691140 | 2.413489130  | -1.165049870 |
| C  | -2.193068800 | 2.352122240  | -2.368678350 |
| C  | -2.317031550 | 1.186523800  | -3.182134820 |
| C  | -3.034275170 | 0.013412270  | -2.719763220 |
| C  | -3.690120480 | -1.202383620 | -0.709874090 |
| C  | -3.670974620 | 0.013300490  | -1.462855810 |
| C  | -3.689434120 | 1.228806330  | -0.709473350 |
| C  | -2.193850490 | -2.325612270 | -2.369414580 |
| C  | -2.317449440 | -1.159756770 | -3.182559570 |
| C  | -3.001350580 | -2.386916570 | -1.165785580 |
| C  | -0.930192930 | 3.095997040  | -2.375969590 |
| C  | 0.148576690  | 2.614270060  | -3.185905290 |
| C  | -2.662426860 | 3.203950600  | 0.001193700  |
| C  | -1.444667170 | 3.958036530  | -0.003787370 |
| C  | -0.596104630 | 3.857574900  | -1.182208310 |
| C  | -2.990855390 | 2.413076790  | 1.169958700  |
| C  | -2.173195770 | 2.351332630  | 2.366770250  |
| C  | -2.290333930 | 1.185470200  | 3.180845100  |
| C  | -3.684143800 | -1.202628430 | 0.719408690  |
| C  | -3.658643600 | 0.012812470  | 1.472594150  |
| C  | -3.683395440 | 1.228554570  | 0.719785840  |
| C  | -3.011443090 | 0.012512430  | 2.724125990  |

|   |              |              |              |
|---|--------------|--------------|--------------|
| C | 0.772208300  | 3.835738820  | -0.726729860 |
| C | 1.815490840  | 3.207829790  | -1.477802010 |
| C | 1.525468620  | 2.649621290  | -2.725188270 |
| C | 2.879177570  | 2.634127750  | -0.733129550 |
| C | 0.778199440  | 3.835500480  | 0.700475290  |
| C | 1.548189040  | 2.648724490  | 2.692148930  |
| C | 1.827743310  | 3.207350270  | 1.442563680  |
| C | 2.885146740  | 2.633894000  | 0.688806980  |
| C | -0.910303840 | 3.095200720  | 2.363707410  |
| C | -0.586241710 | 3.857135280  | 1.167417920  |
| C | 0.175215660  | 2.613223340  | 3.164403290  |
| C | -1.182880050 | -0.706984810 | 3.978003990  |
| C | -1.182631690 | 0.731058740  | 3.978257850  |
| C | 0.034633880  | 1.431370800  | 3.960690050  |
| C | 0.034136750  | -1.407680260 | 3.960127830  |
| C | -2.991549740 | -2.387298020 | 1.169129150  |
| C | -2.173987930 | -2.326395910 | 2.365969570  |
| C | -2.290750420 | -1.160804960 | 3.180497750  |
| C | -0.587672470 | -3.832817630 | 1.166253930  |
| C | -1.446100460 | -3.932922770 | -0.005083720 |
| C | -2.663169370 | -3.177746930 | 0.000143520  |
| C | 0.174311290  | -2.589246740 | 3.163387830  |
| C | -0.911390280 | -3.070880600 | 2.362690570  |
| C | 2.884233500  | -2.610145050 | 0.687947610  |
| C | 1.547327680  | -2.625161400 | 2.691290580  |
| C | 1.826628890  | -3.183444480 | 1.441513950  |
| C | 0.776779250  | -3.811017290 | 0.699232940  |
| C | 1.285830060  | 0.710953370  | 3.928075440  |
| C | 1.285589000  | -0.687686340 | 3.927815310  |
| C | 2.226285200  | -1.407369050 | 3.116490570  |
| C | 3.219430960  | -0.737186130 | 2.316056410  |
| C | 3.700764160  | -1.510060130 | 1.155507500  |
| C | 5.404458110  | 0.011560820  | -0.033164750 |
| F | 6.203250910  | 0.011522940  | -1.150351960 |
| F | 6.212508050  | 0.011171500  | 1.077351370  |

## 66-2

|    |              |              |              |
|----|--------------|--------------|--------------|
| N  | 0.008847330  | -0.005830790 | 0.043449200  |
| Sc | 2.022091720  | -0.011234380 | 0.090068000  |
| Sc | -1.003746550 | -1.751658530 | -0.011432210 |
| Sc | -0.994076350 | 1.745819940  | -0.004218490 |
| C  | 3.582288650  | 1.378009350  | -1.133747210 |
| C  | 3.105143790  | 0.719760830  | -2.336933010 |
| C  | 2.170681520  | 1.417676680  | -3.165800600 |
| C  | 1.231505370  | 0.700659470  | -3.983378940 |
| C  | 1.227645510  | -0.701589690 | -3.986472230 |
| C  | 4.148938190  | 0.718117530  | 0.051619160  |

|   |              |              |              |
|---|--------------|--------------|--------------|
| C | 4.144788890  | -0.752746980 | 0.048416590  |
| C | 3.574530800  | -1.404326400 | -1.139802830 |
| C | 3.101107740  | -0.738221260 | -2.340115390 |
| C | 2.162839770  | -1.427345000 | -3.172025990 |
| C | 2.263340540  | 1.552340920  | 3.222405460  |
| C | 3.444620630  | 1.126144620  | 2.568216420  |
| C | 3.670780920  | 1.512925460  | 1.199759380  |
| C | -1.233390860 | 0.726589030  | -3.999053450 |
| C | -1.237365320 | -0.713909180 | -4.002238270 |
| C | -0.015560760 | 1.425540480  | -3.994946670 |
| C | -0.023383020 | -1.419537580 | -4.001225090 |
| C | 0.122616500  | -2.604523460 | -3.203145770 |
| C | -0.954743290 | -3.082579500 | -2.395304810 |
| C | -0.614564610 | -3.836754630 | -1.200385000 |
| C | 2.864804680  | -2.594099170 | -0.728632290 |
| C | 1.807216100  | -3.190939390 | -1.488346460 |
| C | 1.498120410  | -2.640108490 | -2.737285390 |
| C | 0.758892460  | -3.826264590 | -0.744766630 |
| C | -3.024148040 | 2.424305710  | -1.179138680 |
| C | -2.208495770 | 2.352653490  | -2.380307080 |
| C | -2.331924560 | 1.183900810  | -3.191612240 |
| C | -3.052616280 | 0.008566860  | -2.734940610 |
| C | -3.699739040 | -1.213096640 | -0.728659400 |
| C | -3.681254850 | 0.007563780  | -1.478686860 |
| C | -3.693047020 | 1.225060420  | -0.723357620 |
| C | -2.221439030 | -2.341650390 | -2.390553350 |
| C | -2.338424300 | -1.168718260 | -3.196805800 |
| C | -3.037438850 | -2.413980020 | -1.189684500 |
| C | -0.937798690 | 3.086763750  | -2.381824970 |
| C | 0.136950130  | 2.606226460  | -3.191725390 |
| C | -2.694932040 | 3.223334640  | -0.009938690 |
| C | -1.449638680 | 3.949873740  | -0.012335520 |
| C | -0.593477760 | 3.833863950  | -1.183646580 |
| C | -3.021528960 | 2.421529470  | 1.159807550  |
| C | -2.195158980 | 2.343512660  | 2.352314240  |
| C | -2.296475190 | 1.169013040  | 3.154963680  |
| C | -3.696694800 | -1.216742770 | 0.699217340  |
| C | -3.669840500 | 0.001154150  | 1.455264060  |
| C | -3.690005800 | 1.222446120  | 0.704522900  |
| C | -3.023846430 | -0.003301120 | 2.704246770  |
| C | 0.779913790  | 3.813688780  | -0.728083980 |
| C | 1.824729890  | 3.175802610  | -1.474436420 |
| C | 1.512639470  | 2.632188030  | -2.725771330 |
| C | 2.878964860  | 2.569736030  | -0.717334310 |
| C | 0.781618610  | 3.829580700  | 0.698039650  |
| C | 1.520519520  | 2.673746570  | 2.703369420  |
| C | 1.837451220  | 3.223500050  | 1.451410570  |
| C | 2.893612340  | 2.615292910  | 0.698184420  |
| C | -0.928334800 | 3.077734060  | 2.348676030  |

|   |              |              |              |
|---|--------------|--------------|--------------|
| C | -0.590512320 | 3.840666590  | 1.157676730  |
| C | 0.152612390  | 2.587130450  | 3.142660350  |
| C | -1.183405340 | -0.726681260 | 3.932448240  |
| C | -1.179458300 | 0.704468810  | 3.935586230  |
| C | 0.042723070  | 1.389031650  | 3.925242340  |
| C | 0.034990260  | -1.417964220 | 3.919156190  |
| C | -3.034882740 | -2.421496840 | 1.149238860  |
| C | -2.208054820 | -2.353168240 | 2.342002550  |
| C | -2.302799840 | -1.181515380 | 3.149570180  |
| C | -0.611691390 | -3.853929380 | 1.140876210  |
| C | -1.471369700 | -3.953210990 | -0.029613040 |
| C | -2.712661930 | -3.219921290 | -0.024014590 |
| C | 0.138300160  | -2.613209830 | 3.131325130  |
| C | -0.945314250 | -3.094359030 | 2.335207530  |
| C | 2.879141390  | -2.645849570 | 0.686678890  |
| C | 1.505698610  | -2.705481960 | 2.691644430  |
| C | 1.819627780  | -3.251461830 | 1.437271240  |
| C | 0.760482670  | -3.848414160 | 0.681275040  |
| C | 1.324195850  | 0.695734340  | 3.954460730  |
| C | 1.320269490  | -0.731909330 | 3.951388060  |
| C | 2.254694620  | -1.590508650 | 3.215605760  |
| C | 3.438268200  | -1.167953420 | 2.563221250  |
| C | 3.662251970  | -1.549918130 | 1.193058040  |
| C | 4.215405940  | -0.024263850 | 3.124312140  |
| F | 5.523555050  | -0.026956500 | 2.691192680  |
| F | 4.239037110  | -0.027311870 | 4.495166910  |

**66-3**

|    |              |              |              |
|----|--------------|--------------|--------------|
| N  | 0.076067690  | 0.017049600  | 0.231325040  |
| Sc | 2.024615990  | 0.483343020  | 0.538066010  |
| Sc | -0.780949190 | -1.822325180 | 0.138359670  |
| Sc | -1.101219500 | 1.646400180  | -0.006509260 |
| C  | 3.519064970  | 1.410129510  | -1.267435390 |
| C  | 3.036536180  | 0.715289130  | -2.427546350 |
| C  | 2.084106470  | 1.392467120  | -3.233087770 |
| C  | 1.136814120  | 0.661739690  | -4.020078930 |
| C  | 1.150653190  | -0.742984720 | -3.984544310 |
| C  | 4.201193750  | 0.806850210  | -0.144035270 |
| C  | 4.033919370  | -0.631864600 | 0.001107080  |
| C  | 3.503084390  | -1.354161410 | -1.141609180 |
| C  | 3.052936500  | -0.738550560 | -2.372557820 |
| C  | 2.110602140  | -1.445760570 | -3.171268610 |
| C  | 2.212616580  | 1.365076450  | 3.295458970  |
| C  | 3.343304900  | 0.635127120  | 2.816412300  |
| C  | 4.067800860  | 1.738714170  | 0.948264250  |
| C  | -1.323947270 | 0.669608560  | -3.955119330 |
| C  | -1.313343180 | -0.773013860 | -3.943644140 |
| C  | -0.116400300 | 1.378167800  | -3.994583630 |



|   |              |              |              |
|---|--------------|--------------|--------------|
| C | -0.092238080 | -1.470814810 | -3.954360940 |
| C | 0.083061740  | -2.633494900 | -3.126327640 |
| C | -0.974856330 | -3.109799820 | -2.301006110 |
| C | -0.605435360 | -3.852451170 | -1.104877760 |
| C | 2.870029730  | -2.552037230 | -0.670303020 |
| C | 1.807865230  | -3.162495770 | -1.412489610 |
| C | 1.466120450  | -2.641351350 | -2.672710970 |
| C | 0.767066240  | -3.797806820 | -0.656234620 |
| C | -3.085601660 | 2.395132170  | -1.116330300 |
| C | -2.277922530 | 2.308248610  | -2.324958780 |
| C | -2.404150320 | 1.127127040  | -3.121289290 |
| C | -3.111349230 | -0.049082230 | -2.647974800 |
| C | -3.745894900 | -1.253002220 | -0.627343880 |
| C | -3.730636730 | -0.041419070 | -1.386442980 |
| C | -3.728642980 | 1.188650640  | -0.642456340 |
| C | -2.243961310 | -2.374551850 | -2.289352860 |
| C | -2.396354010 | -1.223822730 | -3.117232220 |
| C | -3.026930990 | -2.423258530 | -1.077966960 |
| C | -1.005794250 | 3.040367400  | -2.353191290 |
| C | 0.045023440  | 2.565302440  | -3.197458180 |
| C | -2.726759300 | 3.191776280  | 0.051344230  |
| C | -1.456758330 | 3.875313480  | 0.032625200  |
| C | -0.630127900 | 3.776473280  | -1.155682630 |
| C | -3.034096640 | 2.392942800  | 1.227580880  |
| C | -2.193311510 | 2.316233460  | 2.412581150  |
| C | -2.325816140 | 1.155841250  | 3.232660530  |
| C | -3.737263900 | -1.248255320 | 0.799909770  |
| C | -3.696227630 | -0.028037230 | 1.542309220  |
| C | -3.706971840 | 1.192094400  | 0.785766140  |
| C | -3.051142950 | -0.021680790 | 2.790992960  |
| C | 0.748999090  | 3.765363760  | -0.728795770 |
| C | 1.762233900  | 3.155500290  | -1.522243300 |
| C | 1.425641540  | 2.601437590  | -2.763596790 |
| C | 2.854507010  | 2.593114060  | -0.804053220 |
| C | 0.801669490  | 3.727657560  | 0.702017300  |
| C | 1.578644940  | 2.571340870  | 2.715689550  |
| C | 1.902196190  | 3.141380420  | 1.444146820  |
| C | 3.041536810  | 2.709355240  | 0.622144730  |
| C | -0.905061830 | 3.018635550  | 2.377562610  |
| C | -0.569143420 | 3.737969930  | 1.173671300  |
| C | 0.182762510  | 2.545462760  | 3.169473670  |
| C | -1.230074910 | -0.737652540 | 4.052702590  |
| C | -1.226772930 | 0.704442880  | 4.034666470  |
| C | -0.005297440 | 1.393991700  | 4.000750430  |
| C | -0.019121210 | -1.456239960 | 4.060866760  |
| C | -3.015848990 | -2.419106630 | 1.249156950  |
| C | -2.205778620 | -2.361400600 | 2.441315340  |
| C | -2.332903920 | -1.193466720 | 3.258428340  |
| C | -0.586532980 | -3.870655260 | 1.246867960  |

|   |              |              |             |
|---|--------------|--------------|-------------|
| C | -1.447747530 | -3.966730180 | 0.076075030 |
| C | -2.659999110 | -3.200180070 | 0.082523240 |
| C | 0.133217650  | -2.624002850 | 3.238117220 |
| C | -0.941114230 | -3.110248240 | 2.438729130 |
| C | 2.898345990  | -2.550883330 | 0.757566290 |
| C | 1.510813330  | -2.651527970 | 2.770873260 |
| C | 1.841609600  | -3.164658850 | 1.507383230 |
| C | 0.783892170  | -3.805359990 | 0.771265490 |
| C | 1.220704110  | 0.660813960  | 4.034871700 |
| C | 1.230243140  | -0.745755000 | 4.063032400 |
| C | 2.172347860  | -1.470807880 | 3.251050300 |
| C | 3.186526730  | -0.786038080 | 2.513994710 |
| C | 3.583514270  | -1.347579280 | 1.215917060 |
| C | 4.517339000  | 1.407734620  | 2.315548220 |
| F | 4.749305530  | 2.531160510  | 3.078030910 |
| F | 5.671881860  | 0.660876890  | 2.312184910 |

**66-4**

|    |              |              |              |
|----|--------------|--------------|--------------|
| N  | 0.030176720  | -0.007889250 | -0.009634580 |
| Sc | 2.042528480  | 0.033078550  | -0.031820770 |
| Sc | -0.994264870 | -1.738312380 | -0.021096170 |
| Sc | -0.966572930 | 1.743016840  | 0.019531940  |
| C  | 3.614314550  | 1.362505870  | -1.207492290 |
| C  | 3.130449000  | 0.701886360  | -2.408451470 |
| C  | 2.172980140  | 1.398830440  | -3.200940150 |
| C  | 1.225347450  | 0.689060700  | -4.012013710 |
| C  | 1.219584400  | -0.716106330 | -4.021779900 |
| C  | 4.194251610  | 0.667796080  | -0.080072120 |
| C  | 4.170740750  | -0.775485570 | -0.082626770 |
| C  | 3.617376320  | -1.450205180 | -1.240997230 |
| C  | 3.131104060  | -0.765963400 | -2.424690170 |
| C  | 2.167156820  | -1.448011940 | -3.227742520 |
| C  | 2.187965190  | 1.721313160  | 3.628098610  |
| C  | 3.684471190  | 0.615244180  | 2.385690750  |
| C  | 3.758171080  | 1.333531090  | 1.125769700  |
| C  | -1.236929220 | 0.718648110  | -3.998800250 |
| C  | -1.242364030 | -0.723794220 | -4.004047080 |
| C  | -0.019268830 | 1.416446900  | -3.998536290 |
| C  | -0.030622530 | -1.431350900 | -4.014679280 |
| C  | 0.124504830  | -2.613268100 | -3.209653150 |
| C  | -0.944877720 | -3.089144190 | -2.389818880 |
| C  | -0.592594170 | -3.832922930 | -1.189604270 |
| C  | 2.908574150  | -2.624508050 | -0.779118660 |
| C  | 1.828911960  | -3.205689780 | -1.513677200 |
| C  | 1.504775820  | -2.656559550 | -2.765663860 |
| C  | 0.783150760  | -3.811875770 | -0.743052940 |
| C  | -3.017322150 | 2.412043860  | -1.174392690 |

|   |              |              |              |
|---|--------------|--------------|--------------|
| C | -2.201474990 | 2.340435680  | -2.372236660 |
| C | -2.331244350 | 1.174916520  | -3.187069270 |
| C | -3.049827540 | -0.000844620 | -2.728822190 |
| C | -3.694568010 | -1.223830190 | -0.724632100 |
| C | -3.681400570 | -0.001638740 | -1.474970950 |
| C | -3.701299090 | 1.218246890  | -0.723970160 |
| C | -2.213013090 | -2.350607760 | -2.383384610 |
| C | -2.336630720 | -1.178342580 | -3.192456610 |
| C | -3.025630680 | -2.422747730 | -1.181615660 |
| C | -0.926107220 | 3.066976990  | -2.366446130 |
| C | 0.143736160  | 2.587054660  | -3.178967110 |
| C | -2.690082950 | 3.212173640  | -0.005644980 |
| C | -1.436476300 | 3.931801850  | 0.003826380  |
| C | -0.574997330 | 3.797161700  | -1.158010590 |
| C | -3.041175470 | 2.417019450  | 1.158693840  |
| C | -2.237867490 | 2.346740560  | 2.362052330  |
| C | -2.363016250 | 1.177917810  | 3.170955890  |
| C | -3.694489990 | -1.223952710 | 0.701739520  |
| C | -3.691277840 | -0.003739570 | 1.454217830  |
| C | -3.711748820 | 1.218268740  | 0.702696810  |
| C | -3.063403610 | -0.004015840 | 2.710832850  |
| C | 0.789875960  | 3.719000520  | -0.683861200 |
| C | 1.830397150  | 3.105673350  | -1.442180530 |
| C | 1.521118260  | 2.601996090  | -2.715754510 |
| C | 2.882422460  | 2.493869160  | -0.686449480 |
| C | 0.794229530  | 3.704009070  | 0.742569190  |
| C | 1.507991520  | 2.732344230  | 2.853344620  |
| C | 1.857056790  | 3.113672810  | 1.534103040  |
| C | 2.924615850  | 2.478685230  | 0.757382080  |
| C | -0.967593740 | 3.075921180  | 2.370768300  |
| C | -0.586882240 | 3.802438880  | 1.178284250  |
| C | 0.090253470  | 2.626960330  | 3.202431860  |
| C | -1.218650920 | -0.700253970 | 3.956485390  |
| C | -1.260696510 | 0.733548520  | 3.971609690  |
| C | -0.065068920 | 1.448425590  | 3.997814070  |
| C | 0.025466000  | -1.354704490 | 3.926040980  |
| C | -3.017775030 | -2.419553470 | 1.157746280  |
| C | -2.189078000 | -2.334912100 | 2.348915400  |
| C | -2.319764400 | -1.170976120 | 3.161761220  |
| C | -0.574907340 | -3.811517750 | 1.150682880  |
| C | -1.442306600 | -3.940906670 | -0.012776090 |
| C | -2.690341280 | -3.220462870 | -0.011025750 |
| C | 0.177713670  | -2.526899640 | 3.119814520  |
| C | -0.905439710 | -3.041945530 | 2.336860080  |
| C | 2.910300030  | -2.605762080 | 0.645917370  |
| C | 1.548994330  | -2.556867190 | 2.661898940  |
| C | 1.845817680  | -3.153844390 | 1.421428820  |
| C | 0.792924910  | -3.793443690 | 0.686844060  |
| C | 1.218048020  | 0.790627380  | 4.108565550  |

|   |             |              |             |
|---|-------------|--------------|-------------|
| C | 1.277579610 | -0.621533570 | 3.959922250 |
| C | 2.236894270 | -1.358169280 | 3.136415530 |
| C | 3.280836990 | -0.774925810 | 2.326227870 |
| C | 3.631749360 | -1.447253170 | 1.088384220 |
| C | 3.627474980 | 1.420514940  | 3.627340000 |
| F | 4.417801760 | 2.548024850  | 3.543421270 |
| F | 4.025227920 | 0.711372800  | 4.738519670 |

**66-5**

|    |              |              |              |
|----|--------------|--------------|--------------|
| N  | 0.005247680  | -0.030681710 | 0.000558090  |
| Sc | 2.002058760  | -0.197354080 | -0.025504570 |
| Sc | -1.070183730 | -1.733192010 | -0.009526130 |
| Sc | -0.959762450 | 1.735461800  | 0.045343590  |
| C  | 3.618612060  | 1.332616550  | -1.203505620 |
| C  | 3.131591570  | 0.669427970  | -2.378954400 |
| C  | 2.189129770  | 1.387709170  | -3.161659080 |
| C  | 1.242243380  | 0.676580680  | -3.975011640 |
| C  | 1.235317180  | -0.730452300 | -3.994047570 |
| C  | 4.143646000  | 0.639041560  | -0.051609760 |
| C  | 4.155430420  | -0.784664930 | -0.042870440 |
| C  | 3.623749200  | -1.473589790 | -1.209231460 |
| C  | 3.138545550  | -0.795516140 | -2.398362160 |
| C  | 2.176795950  | -1.472589520 | -3.203316920 |
| C  | 2.190099010  | 1.494113550  | 3.134456050  |
| C  | 3.159239200  | 0.797251600  | 2.300429410  |
| C  | 3.775988800  | 1.415122070  | 1.123160610  |
| C  | -1.217234860 | 0.707450250  | -3.973160770 |
| C  | -1.227773150 | -0.734590590 | -3.985697050 |
| C  | 0.003974390  | 1.401484500  | -3.956711220 |
| C  | -0.017644240 | -1.443845770 | -3.991745280 |
| C  | 0.129353440  | -2.631992430 | -3.194530180 |
| C  | -0.944390540 | -3.102495690 | -2.377821000 |
| C  | -0.599480870 | -3.845139450 | -1.177977260 |
| C  | 2.892676260  | -2.623999640 | -0.735835660 |
| C  | 1.822946330  | -3.224956840 | -1.486417260 |
| C  | 1.508415770  | -2.679078390 | -2.741870840 |
| C  | 0.776251180  | -3.838865010 | -0.727197030 |
| C  | -3.008346490 | 2.390905360  | -1.163386840 |
| C  | -2.178747010 | 2.322533940  | -2.346746100 |
| C  | -2.313357000 | 1.163621640  | -3.170122860 |
| C  | -3.041472550 | -0.011740590 | -2.719739210 |
| C  | -3.692358970 | -1.240314720 | -0.718800860 |
| C  | -3.677429840 | -0.016512410 | -1.469168740 |
| C  | -3.696364880 | 1.199839900  | -0.715088420 |
| C  | -2.214810890 | -2.366206630 | -2.376035210 |
| C  | -2.328728920 | -1.190231720 | -3.180560020 |
| C  | -3.038981840 | -2.446609730 | -1.178435670 |

|   |              |              |              |
|---|--------------|--------------|--------------|
| C | -0.895875270 | 3.040910660  | -2.319806740 |
| C | 0.173353570  | 2.557146510  | -3.117072430 |
| C | -2.686589110 | 3.192021480  | -0.000376880 |
| C | -1.444307170 | 3.921701200  | 0.006060510  |
| C | -0.541685440 | 3.785577310  | -1.125368050 |
| C | -3.038998180 | 2.401067570  | 1.169654550  |
| C | -2.237670900 | 2.334429450  | 2.375530860  |
| C | -2.346676360 | 1.157383780  | 3.180680860  |
| C | -3.692844690 | -1.240827900 | 0.708772110  |
| C | -3.686693360 | -0.019240670 | 1.463303610  |
| C | -3.706882300 | 1.201387790  | 0.711554220  |
| C | -3.058160140 | -0.021018200 | 2.719240610  |
| C | 0.840792220  | 3.801838250  | -0.637830050 |
| C | 1.917136240  | 3.174373380  | -1.409253440 |
| C | 1.547282410  | 2.588212740  | -2.649475490 |
| C | 3.090607160  | 2.612639600  | -0.766723180 |
| C | 0.758967630  | 3.919037300  | 0.800536130  |
| C | 1.476225420  | 2.732454590  | 2.782877670  |
| C | 1.784253170  | 3.638856890  | 1.760625620  |
| C | 3.452039220  | 2.724257420  | 0.604156200  |
| C | -0.978949290 | 3.084934400  | 2.383117240  |
| C | -0.626609430 | 3.841040770  | 1.193824840  |
| C | 0.096014860  | 2.588042410  | 3.173150490  |
| C | -1.231494130 | -0.736040250 | 3.972732310  |
| C | -1.239546820 | 0.700598700  | 3.976063680  |
| C | -0.026488460 | 1.403846570  | 3.953529780  |
| C | -0.004279990 | -1.415068180 | 3.951825130  |
| C | -3.036563550 | -2.447574630 | 1.166241210  |
| C | -2.208645150 | -2.366999220 | 2.361969110  |
| C | -2.332209210 | -1.197329440 | 3.171327090  |
| C | -0.590684730 | -3.836844270 | 1.159097670  |
| C | -1.453374340 | -3.954347840 | -0.006619570 |
| C | -2.712839770 | -3.249547830 | -0.005713240 |
| C | 0.149197930  | -2.599151110 | 3.157664140  |
| C | -0.930350760 | -3.089910980 | 2.357020150  |
| C | 2.894420740  | -2.602226000 | 0.693972460  |
| C | 1.521383880  | -2.624657900 | 2.686164840  |
| C | 1.828312500  | -3.194850250 | 1.444651850  |
| C | 0.781494870  | -3.830423600 | 0.700011820  |
| C | 1.239593930  | 0.721354520  | 3.912157080  |
| C | 1.238035410  | -0.678730990 | 3.919704420  |
| C | 2.173527540  | -1.393022560 | 3.109543630  |
| C | 3.126357130  | -0.696338040 | 2.302054530  |
| C | 3.626544360  | -1.431687540 | 1.143868060  |
| C | 3.196552430  | 3.912468010  | 1.423528920  |
| F | 3.355076160  | 5.086788100  | 0.720553860  |
| F | 4.002177380  | 3.978884280  | 2.537406800  |

## 66-6

|    |              |              |              |
|----|--------------|--------------|--------------|
| N  | 0.007262220  | -0.010126060 | 0.020387540  |
| Sc | 2.012778110  | 0.093338800  | 0.043680480  |
| Sc | -0.997885040 | -1.745776400 | -0.033151380 |
| Sc | -0.902062990 | 1.780332340  | 0.044571550  |
| C  | 3.612556230  | 1.376798650  | -1.195080500 |
| C  | 3.135343100  | 0.706211840  | -2.394189740 |
| C  | 2.184709230  | 1.396646070  | -3.205288210 |
| C  | 1.235326300  | 0.673307250  | -4.002673140 |
| C  | 1.233092320  | -0.728742450 | -4.004416000 |
| C  | 4.152816480  | 0.710484190  | -0.019700920 |
| C  | 4.123299940  | -0.730982740 | -0.017934310 |
| C  | 3.592771260  | -1.420601730 | -1.181714610 |
| C  | 3.129965830  | -0.759045840 | -2.387280030 |
| C  | 2.178476310  | -1.451317520 | -3.193793320 |
| C  | 2.220884860  | 1.415302500  | 3.201819200  |
| C  | 3.155756160  | 0.740012690  | 2.369156290  |
| C  | 3.636993780  | 1.418388910  | 1.154638540  |
| C  | -1.230409860 | 0.696118320  | -4.003022850 |
| C  | -1.231310050 | -0.744801840 | -3.997765220 |
| C  | -0.016225950 | 1.397195070  | -4.001958840 |
| C  | -0.015435550 | -1.448045350 | -3.998472420 |
| C  | 0.140169900  | -2.621369280 | -3.185293300 |
| C  | -0.934204610 | -3.101070330 | -2.374338950 |
| C  | -0.585454170 | -3.846387240 | -1.176617740 |
| C  | 2.909458480  | -2.610645030 | -0.726401840 |
| C  | 1.840712580  | -3.201606930 | -1.473394000 |
| C  | 1.519554410  | -2.654720950 | -2.728175460 |
| C  | 0.788711630  | -3.823414410 | -0.722232900 |
| C  | -3.004303090 | 2.395072890  | -1.178001080 |
| C  | -2.201157590 | 2.324471810  | -2.384275050 |
| C  | -2.327455410 | 1.154885970  | -3.191257980 |
| C  | -3.041662020 | -0.016559720 | -2.725642160 |
| C  | -3.688359450 | -1.233832570 | -0.719726450 |
| C  | -3.674723790 | -0.011474040 | -1.470292540 |
| C  | -3.694877820 | 1.209216060  | -0.722691740 |
| C  | -2.204697950 | -2.366311660 | -2.373642490 |
| C  | -2.325250180 | -1.195387340 | -3.183863750 |
| C  | -3.023812900 | -2.436390310 | -1.175316790 |
| C  | -0.933777560 | 3.059925140  | -2.391960270 |
| C  | 0.138051100  | 2.580411850  | -3.204085460 |
| C  | -2.669931020 | 3.198144300  | -0.014098160 |
| C  | -1.435372810 | 3.942762580  | -0.016551040 |
| C  | -0.589442240 | 3.807522950  | -1.192799130 |
| C  | -3.002002440 | 2.406104750  | 1.155318570  |
| C  | -2.175890790 | 2.339700910  | 2.348133460  |
| C  | -2.307297160 | 1.164516630  | 3.153182920  |
| C  | -3.686649670 | -1.230128580 | 0.706452000  |

|   |              |              |              |
|---|--------------|--------------|--------------|
| C | -3.669777710 | -0.005917810 | 1.452429520  |
| C | -3.690171740 | 1.212476210  | 0.705009500  |
| C | -3.032984970 | -0.005493780 | 2.705982900  |
| C | 0.781453010  | 3.763076990  | -0.737207380 |
| C | 1.839708350  | 3.159633250  | -1.501962710 |
| C | 1.520244560  | 2.608502590  | -2.743593180 |
| C | 2.891016150  | 2.542820800  | -0.738338380 |
| C | 0.790494350  | 3.804005780  | 0.679612190  |
| C | 1.605724220  | 2.750760140  | 2.910954900  |
| C | 1.981815830  | 3.402469280  | 1.446458220  |
| C | 2.923327460  | 2.570472460  | 0.678434600  |
| C | -0.910559440 | 3.091914780  | 2.371442940  |
| C | -0.563574640 | 3.847954370  | 1.157004920  |
| C | 0.141647790  | 2.617886070  | 3.202964600  |
| C | -1.219258800 | -0.732200500 | 3.970554780  |
| C | -1.215391100 | 0.706136290  | 3.960477250  |
| C | -0.004780990 | 1.413199420  | 3.944965190  |
| C | -0.003672070 | -1.435289480 | 3.969904600  |
| C | -3.015473340 | -2.428648290 | 1.163638120  |
| C | -2.196684080 | -2.357088550 | 2.361099520  |
| C | -2.318430540 | -1.184995380 | 3.169190020  |
| C | -0.580983640 | -3.836494830 | 1.162197240  |
| C | -1.441019860 | -3.954094600 | -0.004300740 |
| C | -2.689612120 | -3.232267320 | -0.003586160 |
| C | 0.151265090  | -2.613472400 | 3.167845020  |
| C | -0.926126750 | -3.091752660 | 2.360309630  |
| C | 2.911186200  | -2.605683790 | 0.701284320  |
| C | 1.529543050  | -2.644478050 | 2.703445380  |
| C | 1.845593870  | -3.196069540 | 1.449337000  |
| C | 0.792254050  | -3.820781600 | 0.703934480  |
| C | 1.250307430  | 0.687273080  | 3.944248250  |
| C | 1.241130370  | -0.714688430 | 3.959108780  |
| C | 2.182230100  | -1.432192030 | 3.150643630  |
| C | 3.134731080  | -0.731883830 | 2.345155830  |
| C | 3.603348650  | -1.414352420 | 1.151650210  |
| C | 2.347254250  | 4.033163110  | 2.749314500  |
| F | 1.727247310  | 5.186071730  | 3.108345670  |
| F | 3.656056580  | 4.070600100  | 3.107294630  |

## 66-7

|    |              |              |              |
|----|--------------|--------------|--------------|
| N  | -0.022125230 | 0.000405520  | -0.045355460 |
| Sc | 1.982603800  | 0.000663870  | -0.057264710 |
| Sc | -1.010385080 | -1.748608170 | -0.030113240 |
| Sc | -1.011098130 | 1.749124300  | -0.030249340 |
| C  | 3.605319610  | 1.404853950  | -1.170749880 |
| C  | 3.136704720  | 0.733416370  | -2.372702730 |
| C  | 2.185770150  | 1.424060890  | -3.190020070 |

|   |              |              |              |
|---|--------------|--------------|--------------|
| C | 1.244953830  | 0.702057760  | -3.999832550 |
| C | 1.244918930  | -0.701571700 | -3.999626680 |
| C | 4.106922990  | 0.718643180  | 0.014590530  |
| C | 4.106857680  | -0.717754160 | 0.014648720  |
| C | 3.605287830  | -1.404075100 | -1.170615820 |
| C | 3.136616610  | -0.732775920 | -2.372592630 |
| C | 2.185836260  | -1.423563290 | -3.189936020 |
| C | 2.216432750  | 1.530571320  | 3.238616790  |
| C | 3.106753380  | 0.745561230  | 2.421400750  |
| C | 3.553468710  | 1.392607940  | 1.180186780  |
| C | -1.220470720 | 0.720600280  | -4.005598020 |
| C | -1.220449160 | -0.720166580 | -4.005548620 |
| C | -0.004196910 | 1.422435240  | -4.005847900 |
| C | -0.004167250 | -1.421981880 | -4.005716500 |
| C | 0.147590420  | -2.604008870 | -3.204854340 |
| C | -0.931502060 | -3.085780200 | -2.400207630 |
| C | -0.590105150 | -3.840644210 | -1.209068300 |
| C | 2.896823950  | -2.582769050 | -0.727549460 |
| C | 1.838172750  | -3.186444650 | -1.489142890 |
| C | 1.525390560  | -2.636203810 | -2.741124000 |
| C | 0.785033570  | -3.824208020 | -0.753109800 |
| C | -3.021441310 | 2.424929310  | -1.192799710 |
| C | -2.202538580 | 2.349927290  | -2.394142820 |
| C | -2.320450000 | 1.176773230  | -3.200177110 |
| C | -3.037151070 | 0.000199040  | -2.740597980 |
| C | -3.677406870 | -1.219131890 | -0.730685540 |
| C | -3.662066970 | 0.000235220  | -1.483223520 |
| C | -3.676726540 | 1.219603720  | -0.730772960 |
| C | -2.202315250 | -2.349296090 | -2.393850430 |
| C | -2.320412170 | -1.176339640 | -3.200140450 |
| C | -3.021039750 | -2.424104450 | -1.192514790 |
| C | -0.931720150 | 3.086404770  | -2.400614230 |
| C | 0.147502180  | 2.604591960  | -3.205146920 |
| C | -2.695179450 | 3.230782040  | -0.025423470 |
| C | -1.449897280 | 3.959583340  | -0.039692370 |
| C | -0.590274620 | 3.841009870  | -1.209332850 |
| C | -3.008689310 | 2.424374910  | 1.150438150  |
| C | -2.175751640 | 2.348829550  | 2.339762210  |
| C | -2.245672030 | 1.171547530  | 3.149176730  |
| C | -3.663925410 | -1.218412840 | 0.697217220  |
| C | -3.623483670 | 0.000249670  | 1.449795620  |
| C | -3.663405110 | 1.218815190  | 0.697104000  |
| C | -2.959456410 | 0.000376020  | 2.690458180  |
| C | 0.784843720  | 3.824641960  | -0.753384680 |
| C | 1.838029020  | 3.187011080  | -1.489391970 |
| C | 1.525295050  | 2.636744470  | -2.741353570 |
| C | 2.896728060  | 2.583471470  | -0.727769750 |
| C | 0.780443640  | 3.831496450  | 0.669997860  |
| C | 1.510341800  | 2.672729360  | 2.674478720  |



|   |              |              |              |
|---|--------------|--------------|--------------|
| C | 1.819077460  | 3.198285580  | 1.420905810  |
| C | 2.879086150  | 2.579227000  | 0.697145150  |
| C | -0.925879260 | 3.101570440  | 2.320575970  |
| C | -0.590837860 | 3.852409360  | 1.126419990  |
| C | 0.143433160  | 2.641895870  | 3.132674340  |
| C | -1.145581300 | -0.729743630 | 3.983348310  |
| C | -1.145631380 | 0.730765680  | 3.983296130  |
| C | 0.020294570  | 1.529661640  | 4.039726350  |
| C | 0.020365070  | -1.528584560 | 4.039830580  |
| C | -3.008604140 | -2.423631810 | 1.150607210  |
| C | -2.175647010 | -2.347946280 | 2.339894940  |
| C | -2.245624460 | -1.170672100 | 3.149306880  |
| C | -0.590626230 | -3.851619700 | 1.126737830  |
| C | -1.449685230 | -3.958919590 | -0.039355120 |
| C | -2.694787260 | -3.229896960 | -0.025180410 |
| C | 0.143541510  | -2.640905870 | 3.132885520  |
| C | -0.925733460 | -3.100647330 | 2.320781440  |
| C | 2.879216260  | -2.578429840 | 0.697361820  |
| C | 1.510450080  | -2.671762280 | 2.674688980  |
| C | 1.819245490  | -3.197484390 | 1.421189400  |
| C | 0.780683860  | -3.830938090 | 0.670316270  |
| C | 1.356215400  | 1.054218850  | 4.286532520  |
| C | 1.356247740  | -1.053009800 | 4.286500990  |
| C | 2.216510540  | -1.529528420 | 3.238724060  |
| C | 3.106770630  | -0.744544250 | 2.421439270  |
| C | 3.553445800  | -1.391658840 | 1.180271330  |
| C | 1.706090110  | 0.000593550  | 5.243146880  |
| F | 3.031353300  | 0.000597380  | 5.614516160  |
| F | 0.939591160  | 0.000574230  | 6.382844360  |

## Optimized anionic intermediates for the nucleophilic route

### PHHJ-1

|    |              |              |              |
|----|--------------|--------------|--------------|
| N  | 0.011578560  | 0.000021840  | 0.000288710  |
| Sc | 2.010126150  | -0.151877010 | 0.000337560  |
| Sc | -0.963384540 | -1.759030000 | 0.000732620  |
| Sc | -0.975411580 | 1.761840030  | -0.000252830 |
| C  | 3.573222240  | 1.409013610  | -1.160604100 |
| C  | 3.127657000  | 0.758421410  | -2.369016120 |
| C  | 2.169209760  | 1.449430050  | -3.187054800 |
| C  | 1.231790870  | 0.729778180  | -4.000213050 |
| C  | 1.236253120  | -0.681222010 | -3.979352130 |
| C  | 4.117762850  | 0.740852140  | 0.000313270  |
| C  | 4.425022950  | -0.751785160 | 0.000772270  |
| C  | 3.674500340  | -1.400485760 | -1.202764010 |
| C  | 3.146469960  | -0.710918080 | -2.353503600 |
| C  | 2.175638330  | -1.393324150 | -3.166618670 |
| C  | 2.168715130  | 1.451299730  | 3.186967680  |
| C  | 3.127297320  | 0.759817920  | 2.369491840  |
| C  | 3.573029030  | 1.409685410  | 1.160751260  |
| C  | -1.237516930 | 0.725948860  | -3.990294880 |
| C  | -1.231085820 | -0.716674340 | -3.987531960 |
| C  | -0.021878100 | 1.435619760  | -3.993335150 |
| C  | -0.008861740 | -1.408528120 | -3.980363110 |
| C  | 0.147108310  | -2.594458060 | -3.180700800 |
| C  | -0.930067510 | -3.077809220 | -2.370292630 |
| C  | -0.583055810 | -3.825366230 | -1.171670500 |
| C  | 2.905766830  | -2.529728620 | -0.711803290 |
| C  | 1.835149650  | -3.127219270 | -1.449252500 |
| C  | 1.521117540  | -2.607622290 | -2.716100000 |
| C  | 0.787762830  | -3.772440360 | -0.709381840 |
| C  | -3.032752750 | 2.411679960  | -1.171055500 |
| C  | -2.218788230 | 2.345327100  | -2.368627400 |
| C  | -2.335206990 | 1.174117540  | -3.180580060 |
| C  | -3.049521630 | -0.005615970 | -2.720384760 |
| C  | -3.697821010 | -1.228395250 | -0.713696930 |
| C  | -3.685531230 | -0.007614860 | -1.467245080 |
| C  | -3.703307510 | 1.212884600  | -0.714481850 |
| C  | -2.202114200 | -2.348509190 | -2.370003910 |
| C  | -2.331297310 | -1.180676500 | -3.185463640 |
| C  | -3.019559790 | -2.422989170 | -1.169159590 |
| C  | -0.950120280 | 3.090000460  | -2.375456600 |
| C  | 0.123148950  | 2.616369200  | -3.183399960 |
| C  | -2.707013530 | 3.215364660  | -0.000952370 |
| C  | -1.466020270 | 3.951829670  | -0.001071220 |
| C  | -0.608086080 | 3.837908420  | -1.172249800 |
| C  | -3.032973930 | 2.412384910  | 1.169576780  |

|    |              |              |              |
|----|--------------|--------------|--------------|
| C  | -2.219175060 | 2.346720140  | 2.367303040  |
| C  | -2.335726550 | 1.175982450  | 3.179924170  |
| C  | -3.697940810 | -1.227977040 | 0.714223090  |
| C  | -3.685781270 | -0.006754590 | 1.467063600  |
| C  | -3.703429880 | 1.213305320  | 0.713585800  |
| C  | -3.049960400 | -0.004023830 | 2.720297820  |
| C  | 0.764004070  | 3.809498110  | -0.714396850 |
| C  | 1.817865870  | 3.188943940  | -1.465082100 |
| C  | 1.507468100  | 2.650325280  | -2.725436040 |
| C  | 2.880138020  | 2.598465260  | -0.711867440 |
| C  | 0.763889140  | 3.809924020  | 0.712703370  |
| C  | 1.507051140  | 2.651938650  | 2.724551420  |
| C  | 1.817626560  | 3.189787820  | 1.463911370  |
| C  | 2.880016250  | 2.598873120  | 0.711210170  |
| C  | -0.950505360 | 3.091405160  | 2.373904120  |
| C  | -0.608277080 | 3.838635440  | 1.170324550  |
| C  | 0.122643140  | 2.618195320  | 3.182261600  |
| C  | -1.231750990 | -0.714342130 | 3.988176040  |
| C  | -1.238167110 | 0.728284790  | 3.990072550  |
| C  | -0.022514320 | 1.437940860  | 3.992888450  |
| C  | -0.009507710 | -1.406164790 | 3.981527430  |
| C  | -3.019767280 | -2.422314310 | 1.170491680  |
| C  | -2.202517440 | -2.347124230 | 2.371421280  |
| C  | -2.331813950 | -1.178806050 | 3.186172320  |
| C  | -0.583249610 | -3.824691570 | 1.174209280  |
| C  | -1.439918020 | -3.950215260 | 0.001231420  |
| C  | -2.687929950 | -3.222488290 | 0.000924760  |
| C  | 0.146583720  | -2.592544290 | 3.182575300  |
| C  | -0.930462490 | -3.076409530 | 2.372315490  |
| C  | 2.905641250  | -2.529302460 | 0.714136610  |
| C  | 1.520659530  | -2.605987910 | 2.718222360  |
| C  | 1.834923840  | -3.126385150 | 1.451766890  |
| C  | 0.787647250  | -3.772038740 | 0.712111990  |
| C  | 1.231163480  | 0.732117190  | 4.000389160  |
| C  | 1.235626910  | -0.678894870 | 3.980360740  |
| C  | 2.175139210  | -1.391472630 | 3.168184280  |
| C  | 3.146067600  | -0.709531710 | 2.354807180  |
| C  | 3.674282930  | -1.399766530 | 1.204557040  |
| C  | 5.965476910  | -0.999454730 | 0.000976120  |
| F  | 6.541465540  | -0.430353950 | 1.097517700  |
| F  | 6.541632790  | -0.431100840 | -1.095863770 |
| Cl | 6.402466910  | -2.764366260 | 0.001612430  |

## PHHJ-2

|    |              |             |             |
|----|--------------|-------------|-------------|
| N  | -0.025592850 | 0.012746350 | 0.056215580 |
| Sc | 1.989298950  | 0.159587260 | 0.035143340 |

|    |              |              |              |
|----|--------------|--------------|--------------|
| Sc | -0.918367700 | -1.782647390 | -0.007023230 |
| Sc | -1.059846240 | 1.720801580  | 0.042947790  |
| C  | 3.618201610  | 1.399444240  | -1.161040360 |
| C  | 3.127055450  | 0.730770140  | -2.349777400 |
| C  | 2.185259270  | 1.426192600  | -3.174045390 |
| C  | 1.240725580  | 0.705821370  | -3.984704220 |
| C  | 1.233918490  | -0.699881890 | -3.985369680 |
| C  | 4.144922880  | 0.704855920  | 0.017511280  |
| C  | 4.142295370  | -0.729656070 | 0.015597530  |
| C  | 3.559143990  | -1.392185160 | -1.124714570 |
| C  | 3.100784120  | -0.733837060 | -2.326643730 |
| C  | 2.169020370  | -1.427730840 | -3.168619120 |
| C  | 2.152343790  | 1.402724690  | 3.147932350  |
| C  | 3.109193240  | 0.690881810  | 2.337346160  |
| C  | 3.633084820  | 1.408915440  | 1.180870850  |
| C  | -1.227038200 | 0.732978330  | -4.000407720 |
| C  | -1.231874960 | -0.707080810 | -4.000488540 |
| C  | -0.005328650 | 1.429814330  | -3.990238190 |
| C  | -0.014923450 | -1.415605310 | -3.995774250 |
| C  | 0.133977400  | -2.593680460 | -3.182216220 |
| C  | -0.946598930 | -3.074531890 | -2.379868020 |
| C  | -0.607370980 | -3.835600690 | -1.181725640 |
| C  | 2.877194080  | -2.587462050 | -0.680920780 |
| C  | 1.818435330  | -3.157934390 | -1.446842800 |
| C  | 1.511067260  | -2.625914910 | -2.716991470 |
| C  | 0.761689130  | -3.784047210 | -0.711707610 |
| C  | -3.025627500 | 2.441188750  | -1.185213380 |
| C  | -2.203664150 | 2.362554530  | -2.384571210 |
| C  | -2.327493450 | 1.194412830  | -3.194155310 |
| C  | -3.047395110 | 0.016000980  | -2.735629430 |
| C  | -3.709610500 | -1.204214280 | -0.729873820 |
| C  | -3.681078510 | 0.015581730  | -1.481053380 |
| C  | -3.691160870 | 1.238910510  | -0.729073810 |
| C  | -2.209616070 | -2.331094780 | -2.381591020 |
| C  | -2.332778230 | -1.160810640 | -3.197904350 |
| C  | -3.025169620 | -2.397606560 | -1.182352600 |
| C  | -0.927351830 | 3.089232550  | -2.376841980 |
| C  | 0.149022970  | 2.612175610  | -3.186882010 |
| C  | -2.705881870 | 3.246534800  | -0.015449510 |
| C  | -1.443294070 | 3.947710510  | -0.010991170 |
| C  | -0.583251900 | 3.826914680  | -1.176027690 |
| C  | -3.046272840 | 2.448428910  | 1.159891130  |
| C  | -2.219600270 | 2.363974400  | 2.357917670  |
| C  | -2.346295500 | 1.188952450  | 3.164995180  |
| C  | -3.713889640 | -1.204508060 | 0.697834320  |
| C  | -3.695759600 | 0.015604270  | 1.450314180  |
| C  | -3.699262390 | 1.241147880  | 0.698599600  |
| C  | -3.067658400 | 0.012465320  | 2.705426610  |
| C  | 0.792740830  | 3.816632500  | -0.718458790 |

|    |              |              |              |
|----|--------------|--------------|--------------|
| C  | 1.838671000  | 3.184068210  | -1.464318420 |
| C  | 1.525816770  | 2.639683800  | -2.720424510 |
| C  | 2.899792810  | 2.574387880  | -0.706733610 |
| C  | 0.789878720  | 3.812312230  | 0.709128740  |
| C  | 1.510426350  | 2.621321770  | 2.709437830  |
| C  | 1.836032730  | 3.185068480  | 1.460931030  |
| C  | 2.902658490  | 2.578241440  | 0.719034330  |
| C  | -0.941786840 | 3.089294320  | 2.360147680  |
| C  | -0.587497970 | 3.835948360  | 1.161913100  |
| C  | 0.129083430  | 2.602025690  | 3.170623650  |
| C  | -1.260793120 | -0.716102500 | 3.979272780  |
| C  | -1.253879200 | 0.726615670  | 3.976143750  |
| C  | -0.033417150 | 1.422217600  | 3.972584490  |
| C  | -0.045578430 | -1.424728570 | 3.975574230  |
| C  | -3.031876900 | -2.396536180 | 1.154189690  |
| C  | -2.223634620 | -2.335016570 | 2.359262490  |
| C  | -2.359198660 | -1.166992910 | 3.175520260  |
| C  | -0.611013240 | -3.832249910 | 1.167335330  |
| C  | -1.464842090 | -3.949376460 | -0.007106650 |
| C  | -2.695520740 | -3.195841470 | -0.013737540 |
| C  | 0.116665470  | -2.610149580 | 3.175764540  |
| C  | -0.962613620 | -3.083068980 | 2.373597360  |
| C  | 2.926494010  | -2.655780800 | 0.740230600  |
| C  | 1.511982620  | -2.667473510 | 2.750324650  |
| C  | 1.838639590  | -3.191930590 | 1.468815810  |
| C  | 0.763421090  | -3.780355930 | 0.713535370  |
| C  | 1.209487200  | 0.690772940  | 3.957424730  |
| C  | 1.200388570  | -0.709944620 | 3.954240030  |
| C  | 2.144384140  | -1.444424210 | 3.156064580  |
| C  | 3.118611880  | -0.755518670 | 2.351570930  |
| C  | 3.887894230  | -1.567591660 | 1.294688210  |
| C  | 5.187943550  | -2.229607470 | 1.850550850  |
| F  | 5.809520680  | -2.964350820 | 0.884070910  |
| F  | 4.915853830  | -3.077918710 | 2.880525960  |
| Cl | 6.387108260  | -0.997322940 | 2.455149240  |

### PHHJ-3

|    |              |              |              |
|----|--------------|--------------|--------------|
| N  | -0.018734950 | 0.017501860  | -0.067647310 |
| Sc | 1.993951090  | -0.102428090 | -0.029007970 |
| Sc | -0.846644400 | -1.807203860 | -0.117269500 |
| Sc | -1.016418950 | 1.739810910  | -0.012759940 |
| C  | 3.597589370  | 1.420524390  | -1.133998200 |
| C  | 3.135934460  | 0.737917070  | -2.323236380 |
| C  | 2.198359120  | 1.425659130  | -3.156856500 |
| C  | 1.260420670  | 0.700074410  | -3.970212370 |

|   |              |              |              |
|---|--------------|--------------|--------------|
| C | 1.256712860  | -0.708683170 | -3.946341220 |
| C | 4.097081890  | 0.724810150  | 0.040319490  |
| C | 4.132259610  | -0.714412140 | 0.053303040  |
| C | 3.614329580  | -1.412474690 | -1.112498780 |
| C | 3.137306490  | -0.732213330 | -2.302818890 |
| C | 2.186347270  | -1.421829140 | -3.123034690 |
| C | 2.146330290  | 1.458875640  | 3.197903930  |
| C | 3.084843920  | 0.755985420  | 2.385690500  |
| C | 3.565273570  | 1.423520440  | 1.194953050  |
| C | -1.205284770 | 0.712432610  | -3.987128270 |
| C | -1.208231890 | -0.727278520 | -3.971243370 |
| C | 0.016007420  | 1.417345130  | -3.984875540 |
| C | 0.008027670  | -1.429835750 | -3.946165410 |
| C | 0.153836150  | -2.604899990 | -3.129328720 |
| C | -0.944572860 | -3.100911960 | -2.338332430 |
| C | -0.600150010 | -3.868125900 | -1.148037210 |
| C | 2.922101310  | -2.602351690 | -0.660714460 |
| C | 1.835768090  | -3.153260190 | -1.390913080 |
| C | 1.518840950  | -2.627128980 | -2.658558470 |
| C | 0.770304330  | -3.812506510 | -0.674719370 |
| C | -3.023137310 | 2.432880150  | -1.198245530 |
| C | -2.190902860 | 2.350234410  | -2.387686250 |
| C | -2.306563930 | 1.172671230  | -3.188798810 |
| C | -3.032394180 | -0.001706040 | -2.725200440 |
| C | -3.730461100 | -1.204685570 | -0.722799900 |
| C | -3.690121520 | 0.010973660  | -1.479804060 |
| C | -3.703743540 | 1.239299340  | -0.740135680 |
| C | -2.203986190 | -2.348923930 | -2.350780480 |
| C | -2.318510500 | -1.178960220 | -3.173180360 |
| C | -3.034812490 | -2.397466520 | -1.161740190 |
| C | -0.917911030 | 3.082672270  | -2.381654010 |
| C | 0.164022190  | 2.599830990  | -3.179068790 |
| C | -2.700037270 | 3.241059540  | -0.030658210 |
| C | -1.448397840 | 3.957057460  | -0.024189060 |
| C | -0.579468540 | 3.835894710  | -1.185428020 |
| C | -3.043504310 | 2.450223680  | 1.142322190  |
| C | -2.231644660 | 2.385575590  | 2.348464700  |
| C | -2.361376970 | 1.220820450  | 3.165217160  |
| C | -3.735956580 | -1.191318810 | 0.706473160  |
| C | -3.708284890 | 0.033178820  | 1.448102570  |
| C | -3.713435550 | 1.251392690  | 0.689506510  |
| C | -3.079706210 | 0.042731640  | 2.707500650  |
| C | 0.791595520  | 3.825399870  | -0.718122510 |
| C | 1.853362310  | 3.202447520  | -1.456587660 |
| C | 1.539299360  | 2.638513910  | -2.707866560 |
| C | 2.921254320  | 2.626576720  | -0.695177590 |
| C | 0.778306120  | 3.833020570  | 0.709124190  |
| C | 1.493704950  | 2.665983540  | 2.723322460  |
| C | 1.824818020  | 3.215027490  | 1.471820950  |

|    |              |              |             |
|----|--------------|--------------|-------------|
| C  | 2.901834960  | 2.625850440  | 0.732703600 |
| C  | -0.957393890 | 3.113721850  | 2.352697510 |
| C  | -0.599490950 | 3.851683440  | 1.153053680 |
| C  | 0.110679230  | 2.638091150  | 3.174428350 |
| C  | -1.274670510 | -0.668113750 | 4.000568780 |
| C  | -1.274839130 | 0.771990190  | 3.993963870 |
| C  | -0.051747540 | 1.467342010  | 3.991407360 |
| C  | -0.056373150 | -1.368062890 | 4.001786400 |
| C  | -3.031757020 | -2.365700300 | 1.170540940 |
| C  | -2.238719200 | -2.296706790 | 2.379446280 |
| C  | -2.369970250 | -1.129187020 | 3.187291170 |
| C  | -0.611263430 | -3.782109300 | 1.200420780 |
| C  | -1.466118250 | -3.943056650 | 0.029371610 |
| C  | -2.686433890 | -3.172781010 | 0.015683590 |
| C  | 0.100175870  | -2.541135020 | 3.190535180 |
| C  | -0.968301460 | -3.029282340 | 2.388676110 |
| C  | 3.148409860  | -2.818253060 | 0.839198150 |
| C  | 1.485481560  | -2.582131260 | 2.740524260 |
| C  | 1.823275080  | -3.165781790 | 1.517692870 |
| C  | 0.765649510  | -3.743714920 | 0.753969850 |
| C  | 1.196620910  | 0.746605590  | 4.012341210 |
| C  | 1.198165970  | -0.656475220 | 4.008095370 |
| C  | 2.160012250  | -1.398598660 | 3.235759820 |
| C  | 3.095831580  | -0.717474470 | 2.387516370 |
| C  | 3.618329670  | -1.397964040 | 1.233474860 |
| C  | 4.266782300  | -3.861780290 | 1.162595110 |
| F  | 4.529865580  | -3.897378600 | 2.500133520 |
| F  | 5.435766820  | -3.541678380 | 0.538773080 |
| Cl | 3.819618710  | -5.551551080 | 0.642676160 |

#### PHHJ-4

|    |              |              |              |
|----|--------------|--------------|--------------|
| N  | 0.015301880  | 0.004294970  | -0.020240670 |
| Sc | 2.003042560  | -0.256254540 | 0.243611910  |
| Sc | -0.757666420 | -1.847640310 | 0.234493090  |
| Sc | -0.971302810 | 1.723613550  | -0.000952030 |
| C  | 3.575265710  | 1.435839600  | -1.202904600 |
| C  | 3.129346830  | 0.773747570  | -2.405912100 |
| C  | 2.173552410  | 1.462557450  | -3.220745230 |
| C  | 1.231133210  | 0.739619460  | -4.023034790 |
| C  | 1.232914850  | -0.670322050 | -4.021387270 |
| C  | 4.091947810  | 0.737015020  | -0.039597960 |
| C  | 4.175412440  | -0.692426530 | -0.037918840 |
| C  | 3.610991110  | -1.355095120 | -1.198009650 |
| C  | 3.134393090  | -0.687601390 | -2.404850320 |
| C  | 2.181333160  | -1.384057510 | -3.209361520 |
| C  | 2.189344030  | 1.437828160  | 3.139496090  |
| C  | 3.152047550  | 0.749237960  | 2.332650720  |

|   |              |              |              |
|---|--------------|--------------|--------------|
| C | 3.605914560  | 1.433929710  | 1.137554300  |
| C | -1.237951680 | 0.746455520  | -4.008759880 |
| C | -1.236827050 | -0.696595260 | -4.017805710 |
| C | -0.022955270 | 1.453722220  | -4.011530580 |
| C | -0.011774910 | -1.394486630 | -4.018434290 |
| C | 0.142622300  | -2.570474980 | -3.205090530 |
| C | -0.931847880 | -3.053805580 | -2.397007090 |
| C | -0.584297070 | -3.796268070 | -1.190067150 |
| C | 2.887562670  | -2.513686740 | -0.727017560 |
| C | 1.823518030  | -3.107836720 | -1.476839680 |
| C | 1.524715280  | -2.599137360 | -2.748621030 |
| C | 0.781716600  | -3.735031500 | -0.723114430 |
| C | -3.021985070 | 2.422562360  | -1.179144260 |
| C | -2.209381640 | 2.361346630  | -2.380421850 |
| C | -2.335062290 | 1.196364590  | -3.197845310 |
| C | -3.041044120 | 0.012149350  | -2.731863750 |
| C | -3.707368290 | -1.219129020 | -0.730467200 |
| C | -3.680632460 | 0.002306140  | -1.477810810 |
| C | -3.693414790 | 1.224127400  | -0.725285110 |
| C | -2.199596070 | -2.327208330 | -2.394900160 |
| C | -2.328596100 | -1.157064530 | -3.210804370 |
| C | -2.992295310 | -2.386592570 | -1.188758980 |
| C | -0.942163750 | 3.099764910  | -2.383458240 |
| C | 0.130395740  | 2.631206770  | -3.202943500 |
| C | -2.686484590 | 3.216965670  | -0.007781480 |
| C | -1.443488600 | 3.944582610  | -0.010436170 |
| C | -0.590659540 | 3.840725490  | -1.184995800 |
| C | -3.017827040 | 2.417891630  | 1.159561780  |
| C | -2.192843140 | 2.348754500  | 2.352307110  |
| C | -2.311686900 | 1.174368860  | 3.160943610  |
| C | -3.709339010 | -1.224743690 | 0.699811180  |
| C | -3.671483200 | -0.007643440 | 1.444621220  |
| C | -3.692846330 | 1.219908540  | 0.701641770  |
| C | -3.025266440 | -0.004175730 | 2.698784480  |
| C | 0.784096010  | 3.828246350  | -0.734615740 |
| C | 1.838936590  | 3.213663300  | -1.489675250 |
| C | 1.510472860  | 2.660653540  | -2.741725220 |
| C | 2.917007370  | 2.636170440  | -0.744819330 |
| C | 0.792002160  | 3.828753430  | 0.692544640  |
| C | 1.533460340  | 2.648437470  | 2.689207370  |
| C | 1.852033550  | 3.205999470  | 1.433145310  |
| C | 2.926937950  | 2.637889860  | 0.685637930  |
| C | -0.925119690 | 3.087700580  | 2.349841310  |
| C | -0.581552460 | 3.838980520  | 1.155092190  |
| C | 0.157312300  | 2.611437610  | 3.155317980  |
| C | -1.199387610 | -0.713202790 | 3.952577270  |
| C | -1.209421750 | 0.724577670  | 3.961497390  |
| C | 0.005936810  | 1.432771770  | 3.959258620  |
| C | 0.016439700  | -1.422329950 | 3.942890790  |



|    |              |              |              |
|----|--------------|--------------|--------------|
| C  | -2.998959090 | -2.410499260 | 1.151854130  |
| C  | -2.173855110 | -2.350200920 | 2.343944770  |
| C  | -2.295451580 | -1.171666700 | 3.148958330  |
| C  | -0.575717310 | -3.911278200 | 1.177008370  |
| C  | -1.435526190 | -3.957007790 | -0.026099470 |
| C  | -2.640082120 | -3.181793170 | -0.025316560 |
| C  | 0.152452580  | -2.619314490 | 3.184969690  |
| C  | -0.909678530 | -3.108412970 | 2.368602140  |
| C  | 2.907937160  | -2.528148320 | 0.706930020  |
| C  | 1.663449250  | -2.821661820 | 2.896948770  |
| C  | 1.842469240  | -3.129745740 | 1.443426240  |
| C  | 0.788159860  | -3.753223010 | 0.709408900  |
| C  | 1.250630570  | 0.713626390  | 3.946767810  |
| C  | 1.264998020  | -0.693526540 | 3.938709090  |
| C  | 2.231377040  | -1.400860210 | 3.171323180  |
| C  | 3.188090910  | -0.725215920 | 2.358885050  |
| C  | 3.721480690  | -1.418031190 | 1.169941060  |
| C  | 2.335462340  | -3.857063230 | 3.846883020  |
| F  | 2.188389500  | -3.516453240 | 5.158246720  |
| F  | 3.677176180  | -3.925857920 | 3.604978700  |
| Cl | 1.657742340  | -5.534488040 | 3.640293440  |

#### PHHJ-5

|    |              |              |              |
|----|--------------|--------------|--------------|
| N  | -0.019478760 | -0.007859750 | 0.048116460  |
| Sc | 1.983897420  | -0.231879870 | 0.261668000  |
| Sc | -1.073851090 | -1.700349290 | -0.059330610 |
| Sc | -0.850665680 | 1.811257780  | -0.006975060 |
| C  | 3.562217520  | 1.403293170  | -1.187810960 |
| C  | 3.126287830  | 0.746120500  | -2.401972240 |
| C  | 2.181040250  | 1.442181380  | -3.213324440 |
| C  | 1.231177910  | 0.718225420  | -4.015303650 |
| C  | 1.233175690  | -0.687581160 | -4.017586300 |
| C  | 4.074419480  | 0.713776050  | -0.028389410 |
| C  | 4.144666570  | -0.721643830 | -0.028398400 |
| C  | 3.597414380  | -1.390165580 | -1.199999510 |
| C  | 3.133664260  | -0.716779880 | -2.404774160 |
| C  | 2.183209210  | -1.409097130 | -3.212622260 |
| C  | 2.216021360  | 1.451036140  | 3.188052450  |
| C  | 3.127143920  | 0.729144740  | 2.341210160  |
| C  | 3.578154660  | 1.416691380  | 1.146407800  |
| C  | -1.234870150 | 0.729593050  | -4.004657330 |
| C  | -1.233304490 | -0.711392700 | -4.003667460 |
| C  | -0.018183790 | 1.437015900  | -4.007556920 |
| C  | -0.014382460 | -1.409644340 | -4.005334410 |
| C  | 0.143132650  | -2.593528140 | -3.203874680 |
| C  | -0.933244670 | -3.070120120 | -2.387345890 |
| C  | -0.583445800 | -3.811292300 | -1.188886810 |

|   |              |              |              |
|---|--------------|--------------|--------------|
| C | 2.906680980  | -2.569701150 | -0.741938840 |
| C | 1.844655890  | -3.165067980 | -1.492375980 |
| C | 1.522514330  | -2.617790920 | -2.744660920 |
| C | 0.790648050  | -3.785691870 | -0.736050600 |
| C | -3.011891340 | 2.405709510  | -1.179692390 |
| C | -2.203363690 | 2.346360110  | -2.381195940 |
| C | -2.332825320 | 1.182091410  | -3.198363490 |
| C | -3.052658810 | 0.004233950  | -2.738527800 |
| C | -3.699616810 | -1.221289890 | -0.731969380 |
| C | -3.686922960 | 0.003665190  | -1.480320660 |
| C | -3.713902180 | 1.221239670  | -0.729259190 |
| C | -2.211057920 | -2.347106110 | -2.386541220 |
| C | -2.332501130 | -1.168520230 | -3.193628120 |
| C | -3.044153230 | -2.431217050 | -1.191668210 |
| C | -0.937327000 | 3.091014840  | -2.384990130 |
| C | 0.137445980  | 2.612083810  | -3.196230360 |
| C | -2.670185760 | 3.199295500  | -0.016339340 |
| C | -1.450408010 | 3.967579000  | -0.017193730 |
| C | -0.592792620 | 3.852695900  | -1.190051400 |
| C | -3.010536140 | 2.407261040  | 1.150915000  |
| C | -2.198451500 | 2.345778490  | 2.349184420  |
| C | -2.324880350 | 1.180847740  | 3.163255770  |
| C | -3.694325150 | -1.220124670 | 0.697197340  |
| C | -3.680860120 | 0.003929660  | 1.448362590  |
| C | -3.711097580 | 1.221994290  | 0.699378530  |
| C | -3.039817690 | 0.004670610  | 2.701795850  |
| C | 0.779531330  | 3.810208420  | -0.729249610 |
| C | 1.837380800  | 3.191573090  | -1.484829780 |
| C | 1.522408600  | 2.648640160  | -2.742332390 |
| C | 2.904390580  | 2.608976190  | -0.733422130 |
| C | 0.784254220  | 3.811756240  | 0.702133310  |
| C | 1.536910480  | 2.635716840  | 2.699802070  |
| C | 1.851897360  | 3.214924280  | 1.456316690  |
| C | 2.909619360  | 2.614623230  | 0.695400840  |
| C | -0.928621490 | 3.088711310  | 2.349566560  |
| C | -0.588628040 | 3.856607970  | 1.160517500  |
| C | 0.151086250  | 2.596438890  | 3.146789250  |
| C | -1.212827190 | -0.713933190 | 3.957009950  |
| C | -1.217079120 | 0.720843380  | 3.957554740  |
| C | -0.000554090 | 1.415493500  | 3.946178060  |
| C | 0.017717000  | -1.395691110 | 3.945822270  |
| C | -3.029839640 | -2.422359600 | 1.154171000  |
| C | -2.201123660 | -2.339206930 | 2.347852330  |
| C | -2.316390620 | -1.170394960 | 3.153727650  |
| C | -0.578415430 | -3.791889760 | 1.143319530  |
| C | -1.442490930 | -3.930404510 | -0.018377140 |
| C | -2.710875220 | -3.227983770 | -0.018355100 |
| C | 0.163046940  | -2.581092140 | 3.141908380  |
| C | -0.918742810 | -3.059195050 | 2.346198440  |

|    |             |              |             |
|----|-------------|--------------|-------------|
| C  | 2.944866940 | -2.581483130 | 0.695688680 |
| C  | 1.540235130 | -2.654902520 | 2.713446910 |
| C  | 1.846831480 | -3.150291960 | 1.453132460 |
| C  | 0.791077410 | -3.761608940 | 0.686652730 |
| C  | 1.254398440 | 0.698135770  | 3.958614480 |
| C  | 1.259241180 | -0.695956170 | 4.012324060 |
| C  | 2.381539340 | -1.537103990 | 3.388526000 |
| C  | 3.172400210 | -0.722724180 | 2.344740840 |
| C  | 3.679264700 | -1.431615790 | 1.162944850 |
| C  | 3.326015690 | -2.170918400 | 4.455294020 |
| F  | 4.213599010 | -3.029684840 | 3.872574660 |
| F  | 2.625764260 | -2.894188020 | 5.374516120 |
| Cl | 4.294691880 | -0.923963500 | 5.359949320 |

### PHHJ-6

|    |              |              |              |
|----|--------------|--------------|--------------|
| N  | -0.007496620 | 0.011779660  | 0.040918770  |
| Sc | 2.008514070  | 0.186756320  | 0.146723980  |
| Sc | -0.857572990 | -1.798171990 | -0.003359740 |
| Sc | -1.072815360 | 1.706875840  | 0.003446830  |
| C  | 3.614038230  | 1.412814440  | -1.179670970 |
| C  | 3.139150490  | 0.734651460  | -2.375796040 |
| C  | 2.193088630  | 1.424117870  | -3.195196430 |
| C  | 1.252551370  | 0.695606050  | -4.005573020 |
| C  | 1.252156770  | -0.708916180 | -3.999959370 |
| C  | 4.159884920  | 0.745739740  | -0.001922750 |
| C  | 4.098326690  | -0.700375190 | 0.004974870  |
| C  | 3.574654970  | -1.387096710 | -1.156938570 |
| C  | 3.133278130  | -0.733262320 | -2.371876330 |
| C  | 2.197684120  | -1.431548670 | -3.191507620 |
| C  | 2.143460770  | 1.408462350  | 3.148244710  |
| C  | 3.157277780  | 0.753551340  | 2.370220550  |
| C  | 3.649950040  | 1.440175940  | 1.179815950  |
| C  | -1.213717920 | 0.715912440  | -4.014234160 |
| C  | -1.214239700 | -0.725172540 | -4.010620090 |
| C  | 0.004589630  | 1.416896070  | -4.010592840 |
| C  | 0.003113400  | -1.429338440 | -4.001563060 |
| C  | 0.153679600  | -2.605235970 | -3.188979570 |
| C  | -0.927826190 | -3.085755050 | -2.386784270 |
| C  | -0.588569020 | -3.844000200 | -1.186358760 |
| C  | 2.903447460  | -2.588211010 | -0.709498920 |
| C  | 1.842294170  | -3.177417630 | -1.467567120 |
| C  | 1.534552500  | -2.641707080 | -2.728318890 |
| C  | 0.781525390  | -3.793954960 | -0.716920350 |
| C  | -3.029059640 | 2.428775620  | -1.212914460 |
| C  | -2.196420140 | 2.348696820  | -2.405677640 |
| C  | -2.315850970 | 1.174075510  | -3.212006750 |
| C  | -3.038141080 | -0.002068590 | -2.755461330 |

|   |              |              |              |
|---|--------------|--------------|--------------|
| C | -3.711615320 | -1.215087300 | -0.748852980 |
| C | -3.677270190 | 0.002106460  | -1.502458230 |
| C | -3.692253080 | 1.228502210  | -0.756543360 |
| C | -2.192459840 | -2.342590270 | -2.390677990 |
| C | -2.319161570 | -1.178362830 | -3.211791930 |
| C | -3.007978540 | -2.400139100 | -1.193240560 |
| C | -0.925595170 | 3.079059870  | -2.404212860 |
| C | 0.155927750  | 2.602001510  | -3.211364530 |
| C | -2.710106650 | 3.236329640  | -0.039549120 |
| C | -1.445612440 | 3.936825480  | -0.037918980 |
| C | -0.582736430 | 3.819480960  | -1.201867940 |
| C | -3.043342740 | 2.437534980  | 1.135145570  |
| C | -2.223806630 | 2.367212170  | 2.338918410  |
| C | -2.329302660 | 1.193511470  | 3.154839290  |
| C | -3.710525890 | -1.209155600 | 0.680274030  |
| C | -3.682443190 | 0.012060120  | 1.428837460  |
| C | -3.701722530 | 1.234616480  | 0.675376320  |
| C | -3.041283330 | 0.015208200  | 2.680583550  |
| C | 0.790519090  | 3.815329760  | -0.744028850 |
| C | 1.842202410  | 3.183714850  | -1.488608880 |
| C | 1.531833930  | 2.638247170  | -2.748777780 |
| C | 2.903187930  | 2.587660000  | -0.733173450 |
| C | 0.785207930  | 3.814916550  | 0.682042130  |
| C | 1.493496060  | 2.627142910  | 2.678980300  |
| C | 1.826954470  | 3.181881820  | 1.437638820  |
| C | 2.913407920  | 2.595219620  | 0.702068740  |
| C | -0.944563800 | 3.087007560  | 2.331505830  |
| C | -0.590858490 | 3.827789470  | 1.134338520  |
| C | 0.125214370  | 2.602320550  | 3.138214440  |
| C | -1.230029510 | -0.700784740 | 3.963539300  |
| C | -1.254882210 | 0.747420610  | 3.992386890  |
| C | -0.013653230 | 1.417266500  | 3.947641220  |
| C | -0.035813990 | -1.419767760 | 4.007958430  |
| C | -3.018935650 | -2.393818000 | 1.138112650  |
| C | -2.203925940 | -2.322922430 | 2.337808440  |
| C | -2.321296560 | -1.152785900 | 3.140154750  |
| C | -0.593849150 | -3.833751360 | 1.164242090  |
| C | -1.449372820 | -3.953395060 | -0.014696330 |
| C | -2.673290140 | -3.190624860 | -0.023601090 |
| C | 0.127278000  | -2.548192380 | 3.160253970  |
| C | -0.940435790 | -3.054201900 | 2.350229680  |
| C | 2.896023930  | -2.582429270 | 0.718369300  |
| C | 1.514091890  | -2.590229490 | 2.711288350  |
| C | 1.831462100  | -3.168925370 | 1.473961870  |
| C | 0.773243380  | -3.782910190 | 0.711647860  |
| C | 1.231875300  | 0.727585020  | 3.992628680  |
| C | 1.333626140  | -0.749337880 | 4.277578960  |
| C | 2.207617270  | -1.426664480 | 3.210000780  |
| C | 3.122861510  | -0.729004110 | 2.382447900  |

|    |             |              |             |
|----|-------------|--------------|-------------|
| C  | 3.575810500 | -1.393448100 | 1.175977040 |
| C  | 1.798364080 | -1.063003590 | 5.730426370 |
| F  | 1.838440000 | -2.406614850 | 5.968360920 |
| F  | 0.937727600 | -0.527927190 | 6.642513830 |
| Cl | 3.457494610 | -0.401086930 | 6.090682740 |

### THJ-1

|    |              |              |              |
|----|--------------|--------------|--------------|
| N  | -0.015412080 | 0.000569070  | 0.001192510  |
| Sc | 2.014823410  | 0.023716000  | -0.053619980 |
| Sc | -0.951295250 | -1.771624880 | 0.015946200  |
| Sc | -1.025013580 | 1.726967350  | 0.031818070  |
| C  | 3.626253030  | 1.397816720  | -1.167676480 |
| C  | 3.137894310  | 0.727810390  | -2.358997680 |
| C  | 2.187307060  | 1.425768830  | -3.183055690 |
| C  | 1.245166730  | 0.703954240  | -3.990415100 |
| C  | 1.239383570  | -0.703452060 | -3.990281260 |
| C  | 4.151464880  | 0.710170710  | 0.009012420  |
| C  | 4.126604610  | -0.735773820 | 0.021561540  |
| C  | 3.596168400  | -1.411475480 | -1.156897080 |
| C  | 3.128502340  | -0.738131560 | -2.357017310 |
| C  | 2.176252400  | -1.427696690 | -3.174666830 |
| C  | 2.155690960  | 1.388809890  | 3.162309580  |
| C  | 3.134973910  | 0.717255890  | 2.380559350  |
| C  | 3.584039920  | 1.371128620  | 1.180435360  |
| C  | -1.221968800 | 0.727596110  | -4.005121270 |
| C  | -1.227874570 | -0.713212860 | -4.008072900 |
| C  | -0.002482960 | 1.427701620  | -3.998735650 |
| C  | -0.010348270 | -1.419639550 | -3.998315100 |
| C  | 0.134541760  | -2.600478960 | -3.190420980 |
| C  | -0.946325610 | -3.076524600 | -2.383541170 |
| C  | -0.611868790 | -3.829597860 | -1.183705810 |
| C  | 2.864078090  | -2.569006450 | -0.698740730 |
| C  | 1.808791670  | -3.168521180 | -1.458065330 |
| C  | 1.511056190  | -2.635780910 | -2.722834510 |
| C  | 0.759153920  | -3.796855670 | -0.714622020 |
| C  | -3.020607900 | 2.431884080  | -1.193407400 |
| C  | -2.197685880 | 2.356211420  | -2.388885150 |
| C  | -2.323082910 | 1.187423970  | -3.202283430 |
| C  | -3.045524000 | 0.012485470  | -2.745207980 |
| C  | -3.714712100 | -1.205969670 | -0.740798160 |
| C  | -3.683681710 | 0.013810690  | -1.491958150 |
| C  | -3.695747830 | 1.235204260  | -0.740521490 |
| C  | -2.211776900 | -2.333120170 | -2.388331170 |
| C  | -2.330396650 | -1.165625460 | -3.205467320 |
| C  | -3.030492510 | -2.399059670 | -1.192675290 |
| C  | -0.924304660 | 3.085075590  | -2.385973760 |
| C  | 0.151089920  | 2.609025810  | -3.195490630 |

|    |              |              |              |
|----|--------------|--------------|--------------|
| C  | -2.699877740 | 3.234271880  | -0.019809870 |
| C  | -1.442182840 | 3.943695240  | -0.015597070 |
| C  | -0.581147460 | 3.821849190  | -1.180629650 |
| C  | -3.040183820 | 2.436442570  | 1.150485850  |
| C  | -2.222958260 | 2.357899780  | 2.353397800  |
| C  | -2.343354260 | 1.183192390  | 3.160962510  |
| C  | -3.721437500 | -1.207802560 | 0.687274250  |
| C  | -3.696336790 | 0.012471990  | 1.439864820  |
| C  | -3.704322090 | 1.236692540  | 0.688190370  |
| C  | -3.067593390 | 0.009700020  | 2.696118000  |
| C  | 0.792124370  | 3.799104200  | -0.720787810 |
| C  | 1.843030800  | 3.171561980  | -1.468206280 |
| C  | 1.531820670  | 2.635111090  | -2.730312600 |
| C  | 2.904816990  | 2.570159360  | -0.712656600 |
| C  | 0.785178160  | 3.798594530  | 0.705528330  |
| C  | 1.498483990  | 2.596285550  | 2.697645880  |
| C  | 1.826506480  | 3.157498060  | 1.455874180  |
| C  | 2.887506790  | 2.557272080  | 0.713278000  |
| C  | -0.942365710 | 3.077989720  | 2.356519390  |
| C  | -0.588103570 | 3.828108660  | 1.159952200  |
| C  | 0.126320770  | 2.582784030  | 3.163180570  |
| C  | -1.259497100 | -0.717645880 | 3.968190380  |
| C  | -1.257407240 | 0.723040900  | 3.980790340  |
| C  | -0.025054930 | 1.405742010  | 3.979816250  |
| C  | -0.047238340 | -1.422751270 | 3.967111590  |
| C  | -3.047712420 | -2.406296540 | 1.144339550  |
| C  | -2.236060160 | -2.339568560 | 2.346667150  |
| C  | -2.357319190 | -1.170026350 | 3.158255370  |
| C  | -0.621019550 | -3.840709890 | 1.162610780  |
| C  | -1.475165230 | -3.949794560 | -0.018449230 |
| C  | -2.708911270 | -3.203869100 | -0.024488360 |
| C  | 0.101513710  | -2.596114980 | 3.165849710  |
| C  | -0.967256070 | -3.079200740 | 2.355006790  |
| C  | 2.854533350  | -2.556187190 | 0.728058750  |
| C  | 1.496119640  | -2.617186900 | 2.721375220  |
| C  | 1.812383900  | -3.196649070 | 1.475867920  |
| C  | 0.757552670  | -3.798553850 | 0.716403400  |
| C  | 1.223431950  | 0.692654430  | 4.011570390  |
| C  | 1.222966580  | -0.721890980 | 3.981053750  |
| C  | 2.171982310  | -1.465647470 | 3.230135900  |
| C  | 3.416477720  | -0.815883620 | 2.589685210  |
| C  | 3.595536950  | -1.413349160 | 1.185766860  |
| C  | 4.689660380  | -0.985579560 | 3.473344860  |
| F  | 4.512204470  | -0.436456130 | 4.706198260  |
| F  | 5.764335730  | -0.354646050 | 2.912103000  |
| Cl | 5.145485540  | -2.731933120 | 3.703799150  |

**THJ-2**

|    |              |              |              |
|----|--------------|--------------|--------------|
| N  | -0.004882110 | -0.023211040 | 0.136677680  |
| Sc | 1.995289330  | 0.143933250  | 0.217576270  |
| Sc | -1.001494710 | -1.752325470 | 0.023849000  |
| Sc | -0.864692870 | 1.790827040  | 0.214245220  |
| C  | 3.589873500  | 1.385079890  | -1.149017000 |
| C  | 3.128193310  | 0.724181950  | -2.358339350 |
| C  | 2.188119030  | 1.422432700  | -3.172763510 |
| C  | 1.244824360  | 0.700445180  | -3.986600700 |
| C  | 1.248590480  | -0.703956740 | -3.996829820 |
| C  | 4.142993950  | 0.714352060  | 0.014133340  |
| C  | 4.101969310  | -0.727488540 | 0.006301380  |
| C  | 3.578519410  | -1.407469830 | -1.161250520 |
| C  | 3.129278330  | -0.739832940 | -2.365655380 |
| C  | 2.193363540  | -1.431498110 | -3.189975410 |
| C  | 2.149973960  | 1.398595720  | 3.153957370  |
| C  | 3.157967210  | 0.707609770  | 2.389271750  |
| C  | 3.646002400  | 1.415006230  | 1.200082400  |
| C  | -1.220374260 | 0.716430200  | -3.997844430 |
| C  | -1.217740390 | -0.724943820 | -4.001691590 |
| C  | -0.004726450 | 1.419371850  | -3.987256790 |
| C  | 0.001355470  | -1.426334170 | -4.001271950 |
| C  | 0.155902690  | -2.606112130 | -3.195680670 |
| C  | -0.921139550 | -3.088810240 | -2.390820650 |
| C  | -0.577394150 | -3.839589060 | -1.194865330 |
| C  | 2.912421840  | -2.610939190 | -0.718729910 |
| C  | 1.849041490  | -3.195915180 | -1.477355610 |
| C  | 1.534044720  | -2.640571700 | -2.730894100 |
| C  | 0.793748430  | -3.823456460 | -0.733461530 |
| C  | -3.001858100 | 2.377828890  | -1.164358260 |
| C  | -2.197942650 | 2.324850160  | -2.367924800 |
| C  | -2.325005680 | 1.167883960  | -3.192270260 |
| C  | -3.038818360 | -0.009751090 | -2.733053640 |
| C  | -3.690355960 | -1.243778640 | -0.735740400 |
| C  | -3.678325990 | -0.016255650 | -1.480098030 |
| C  | -3.708036360 | 1.197350350  | -0.722001330 |
| C  | -2.192411040 | -2.357611010 | -2.391479500 |
| C  | -2.315833380 | -1.184045890 | -3.196731770 |
| C  | -3.015286950 | -2.437748350 | -1.196197620 |
| C  | -0.931915920 | 3.060339440  | -2.359817110 |
| C  | 0.144489170  | 2.598574740  | -3.174107080 |
| C  | -2.677689650 | 3.172467540  | 0.003168380  |
| C  | -1.452301700 | 3.933165280  | 0.011703330  |
| C  | -0.593652180 | 3.792930000  | -1.150860500 |
| C  | -3.039868060 | 2.384824310  | 1.170693220  |
| C  | -2.219543980 | 2.322621710  | 2.369374090  |
| C  | -2.349875750 | 1.136237480  | 3.175248960  |
| C  | -3.699647250 | -1.251792730 | 0.691641270  |

|    |              |              |              |
|----|--------------|--------------|--------------|
| C  | -3.699280280 | -0.033023580 | 1.449867250  |
| C  | -3.722334320 | 1.193852680  | 0.707052810  |
| C  | -3.058461170 | -0.036246170 | 2.700644800  |
| C  | 0.774499490  | 3.765502550  | -0.682074680 |
| C  | 1.834966560  | 3.175012810  | -1.449954580 |
| C  | 1.520914810  | 2.627729540  | -2.703356420 |
| C  | 2.876137220  | 2.552738300  | -0.682056980 |
| C  | 0.768635070  | 3.798306830  | 0.737777480  |
| C  | 1.507878290  | 2.608800510  | 2.741019010  |
| C  | 1.986858430  | 3.444247740  | 1.583239220  |
| C  | 2.901578530  | 2.560476580  | 0.737505520  |
| C  | -0.963754110 | 3.077591960  | 2.385586050  |
| C  | -0.597177630 | 3.856980500  | 1.197817240  |
| C  | 0.138691690  | 2.553302530  | 3.151401670  |
| C  | -1.246104950 | -0.767964380 | 3.968862900  |
| C  | -1.248215800 | 0.673310140  | 3.968804050  |
| C  | -0.029581410 | 1.369144420  | 3.965602220  |
| C  | -0.026970320 | -1.469004940 | 3.969515190  |
| C  | -3.030932820 | -2.455095890 | 1.142741590  |
| C  | -2.213888270 | -2.387026140 | 2.344262670  |
| C  | -2.340723840 | -1.219748070 | 3.156848580  |
| C  | -0.586169200 | -3.860674830 | 1.143778080  |
| C  | -1.441247820 | -3.965291330 | -0.031872760 |
| C  | -2.690605750 | -3.247219000 | -0.032532850 |
| C  | 0.133291040  | -2.642627440 | 3.158130500  |
| C  | -0.938958390 | -3.120129830 | 2.344859370  |
| C  | 2.915486190  | -2.624157260 | 0.710233840  |
| C  | 1.517400250  | -2.668451460 | 2.702816700  |
| C  | 1.843159010  | -3.221569640 | 1.452624620  |
| C  | 0.790591460  | -3.835336050 | 0.693895870  |
| C  | 1.209630720  | 0.657153320  | 3.967407700  |
| C  | 1.220234620  | -0.746070200 | 3.969913540  |
| C  | 2.174887450  | -1.466524530 | 3.177747730  |
| C  | 3.135765780  | -0.757807980 | 2.372693090  |
| C  | 3.602713990  | -1.435987250 | 1.174220350  |
| C  | 2.778846010  | 4.720201180  | 2.023912300  |
| F  | 3.225344590  | 5.420581970  | 0.937939290  |
| F  | 3.878844520  | 4.378497240  | 2.750739200  |
| Cl | 1.782145130  | 5.854787020  | 3.031356860  |



## Optimized transition states for nucleophilic route

### 66-1

|    |              |              |              |
|----|--------------|--------------|--------------|
| N  | 0.052859950  | 0.016663950  | 0.000306350  |
| Sc | 2.065767920  | -0.083527700 | 0.000633240  |
| Sc | -0.923233030 | -1.755559590 | 0.000661190  |
| Sc | -0.998399090 | 1.749709690  | -0.000389890 |
| C  | 3.575319570  | 1.484008510  | -1.176655510 |
| C  | 3.138895840  | 0.800268450  | -2.363075180 |
| C  | 2.165591800  | 1.475805840  | -3.180415790 |
| C  | 1.237278490  | 0.748782300  | -3.993802960 |
| C  | 1.254583370  | -0.662268550 | -3.978552250 |
| C  | 4.185899480  | 0.864493140  | 0.000336640  |
| C  | 4.359070120  | -0.759334040 | 0.000782580  |
| C  | 3.683386700  | -1.382398980 | -1.205439010 |
| C  | 3.171302240  | -0.681497930 | -2.354546600 |
| C  | 2.199917200  | -1.367132300 | -3.166626450 |
| C  | 2.164962240  | 1.477626980  | 3.180203630  |
| C  | 3.138514520  | 0.801546590  | 2.363540450  |
| C  | 3.575308010  | 1.484803000  | 1.176934920  |
| C  | -1.231908360 | 0.727660910  | -3.990516870 |
| C  | -1.213388610 | -0.714729220 | -3.988557340 |
| C  | -0.022233900 | 1.445856540  | -3.990625180 |
| C  | 0.014480780  | -1.397384040 | -3.981123090 |
| C  | 0.177516930  | -2.580785240 | -3.180097230 |
| C  | -0.894939100 | -3.073194060 | -2.370304330 |
| C  | -0.544985980 | -3.820615290 | -1.171841550 |
| C  | 2.930222690  | -2.513103940 | -0.711853620 |
| C  | 1.865461980  | -3.112033300 | -1.451902390 |
| C  | 1.550509530  | -2.583531330 | -2.712619090 |
| C  | 0.824344440  | -3.761822060 | -0.709910630 |
| C  | -3.046072540 | 2.400055980  | -1.171501100 |
| C  | -2.228977850 | 2.339720580  | -2.369485590 |
| C  | -2.334051830 | 1.167212140  | -3.182144940 |
| C  | -3.036900930 | -0.018422140 | -2.721777760 |
| C  | -3.677032200 | -1.245029790 | -0.713797220 |
| C  | -3.671084780 | -0.025939390 | -1.467077430 |
| C  | -3.701250180 | 1.193753860  | -0.714567650 |
| C  | -2.170931620 | -2.353002430 | -2.369410910 |
| C  | -2.308509450 | -1.186338970 | -3.185748740 |
| C  | -2.986429850 | -2.432189510 | -1.168698230 |
| C  | -0.968385750 | 3.092050840  | -2.373635660 |
| C  | 0.110256930  | 2.628474600  | -3.182922250 |
| C  | -2.729067770 | 3.204538310  | -0.000964770 |
| C  | -1.494003490 | 3.946570330  | -0.001081180 |
| C  | -0.635503930 | 3.843425240  | -1.171626770 |

|    |              |              |              |
|----|--------------|--------------|--------------|
| C  | -3.046285590 | 2.400747500  | 1.169993500  |
| C  | -2.229394860 | 2.341117120  | 2.368149830  |
| C  | -2.334600230 | 1.169078920  | 3.181479060  |
| C  | -3.677135420 | -1.244613620 | 0.714328530  |
| C  | -3.671337060 | -0.025078660 | 1.466883220  |
| C  | -3.701401940 | 1.194179710  | 0.713662290  |
| C  | -3.037357080 | -0.016827780 | 2.721683830  |
| C  | 0.735738570  | 3.837491030  | -0.713990320 |
| C  | 1.794664130  | 3.227029780  | -1.464110290 |
| C  | 1.488863600  | 2.670098280  | -2.716543580 |
| C  | 2.868051920  | 2.654082160  | -0.715296590 |
| C  | 0.735619350  | 3.837917260  | 0.712267410  |
| C  | 1.488369540  | 2.671685100  | 2.715611860  |
| C  | 1.794418370  | 3.227918000  | 1.462941780  |
| C  | 2.867985370  | 2.654546880  | 0.714715270  |
| C  | -0.968805260 | 3.093456480  | 2.372068850  |
| C  | -0.635705060 | 3.844114060  | 1.169668580  |
| C  | 0.109693210  | 2.630353800  | 3.181810320  |
| C  | -1.214058260 | -0.712396230 | 3.989179090  |
| C  | -1.232592340 | 0.729997580  | 3.990290570  |
| C  | -0.022929560 | 1.448199140  | 3.990171430  |
| C  | 0.013812290  | -1.395064960 | 3.982345200  |
| C  | -2.986610700 | -2.431506460 | 1.170044590  |
| C  | -2.171331510 | -2.351629580 | 2.370856240  |
| C  | -2.309046510 | -1.184475030 | 3.186470950  |
| C  | -0.545185540 | -3.819938690 | 1.174408920  |
| C  | -1.400249390 | -3.948601270 | 0.001248250  |
| C  | -2.648532670 | -3.226657770 | 0.000930070  |
| C  | 0.176986670  | -2.578949310 | 3.182059440  |
| C  | -0.895339540 | -3.071825590 | 2.372381630  |
| C  | 2.930136120  | -2.512733230 | 0.714225630  |
| C  | 1.550063420  | -2.581983310 | 2.714815300  |
| C  | 1.865234590  | -3.111213190 | 1.454454950  |
| C  | 0.824227450  | -3.761419130 | 0.712675760  |
| C  | 1.236567670  | 0.751111400  | 3.993910630  |
| C  | 1.253909490  | -0.659950860 | 3.979523560  |
| C  | 2.199378980  | -1.365302300 | 3.168182910  |
| C  | 3.170957680  | -0.680175790 | 2.355880100  |
| C  | 3.683294240  | -1.381790020 | 1.207301560  |
| C  | 5.688497260  | -0.203386030 | 0.000580960  |
| F  | 6.342689750  | 0.089134110  | 1.114318270  |
| F  | 6.342580540  | 0.088403550  | -1.113425570 |
| Cl | 6.606091190  | -2.691338770 | 0.001555680  |

## 66-2

|    |              |              |              |
|----|--------------|--------------|--------------|
| N  | -0.002727570 | 0.011968340  | 0.042191530  |
| Sc | 2.026515920  | 0.006772970  | 0.057896360  |
| Sc | -0.951348790 | -1.760024090 | 0.018112380  |
| Sc | -1.020305360 | 1.741264770  | 0.012905430  |
| C  | 3.594791470  | 1.419718050  | -1.153312530 |
| C  | 3.123304440  | 0.748652860  | -2.348245240 |
| C  | 2.176968730  | 1.435545430  | -3.180166360 |
| C  | 1.242307070  | 0.705632290  | -3.989508530 |
| C  | 1.246881080  | -0.700101470 | -3.981968750 |
| C  | 4.146832680  | 0.754933930  | 0.030737950  |
| C  | 4.153468680  | -0.701996580 | 0.046612800  |
| C  | 3.601070070  | -1.371322440 | -1.133616350 |
| C  | 3.127654390  | -0.712846670 | -2.339453140 |
| C  | 2.186468030  | -1.412897600 | -3.160163060 |
| C  | 2.178053910  | 1.497819170  | 3.192419150  |
| C  | 3.264254330  | 0.943958350  | 2.469957510  |
| C  | 3.610407710  | 1.472894370  | 1.185152720  |
| C  | -1.224571880 | 0.713065560  | -4.007132220 |
| C  | -1.219939400 | -0.728210400 | -4.002492960 |
| C  | -0.010231760 | 1.420860490  | -4.003888850 |
| C  | 0.001468800  | -1.425606040 | -3.990509520 |
| C  | 0.152975180  | -2.603250260 | -3.179806330 |
| C  | -0.925093540 | -3.082577800 | -2.371000250 |
| C  | -0.585917610 | -3.827814160 | -1.168274360 |
| C  | 2.875055050  | -2.535539250 | -0.687248190 |
| C  | 1.829290870  | -3.151364660 | -1.445722090 |
| C  | 1.527868550  | -2.624990360 | -2.709360840 |
| C  | 0.784323610  | -3.788103270 | -0.700959350 |
| C  | -3.035740330 | 2.416527440  | -1.203738270 |
| C  | -2.213243590 | 2.342033610  | -2.399504300 |
| C  | -2.329097070 | 1.168529790  | -3.206954760 |
| C  | -3.043959180 | -0.009142330 | -2.744930320 |
| C  | -3.700914580 | -1.222213270 | -0.733645970 |
| C  | -3.680416510 | -0.006409010 | -1.491087780 |
| C  | -3.702097630 | 1.217359600  | -0.744582480 |
| C  | -2.195473160 | -2.348419400 | -2.377889090 |
| C  | -2.320296740 | -1.184445710 | -3.198554420 |
| C  | -3.014906920 | -2.415666790 | -1.181388220 |
| C  | -0.946228530 | 3.081390040  | -2.400027470 |
| C  | 0.133432950  | 2.606960160  | -3.205717400 |
| C  | -2.719361550 | 3.225932470  | -0.035840050 |
| C  | -1.471838180 | 3.950756090  | -0.034897720 |
| C  | -0.609181810 | 3.830546080  | -1.200398730 |
| C  | -3.051999280 | 2.430893360  | 1.138120850  |
| C  | -2.233981830 | 2.366263910  | 2.339361890  |
| C  | -2.338934210 | 1.194924750  | 3.151012130  |
| C  | -3.707368660 | -1.217246210 | 0.694511440  |

|    |              |              |              |
|----|--------------|--------------|--------------|
| C  | -3.690028520 | 0.006127500  | 1.442213190  |
| C  | -3.709544620 | 1.225010880  | 0.683957190  |
| C  | -3.054713180 | 0.013998230  | 2.696086260  |
| C  | 0.762705010  | 3.819556770  | -0.739590550 |
| C  | 1.817517560  | 3.192310290  | -1.482563880 |
| C  | 1.510627270  | 2.643793010  | -2.737445520 |
| C  | 2.879109160  | 2.601519840  | -0.722720800 |
| C  | 0.755964530  | 3.832160910  | 0.686867150  |
| C  | 1.480305080  | 2.666554170  | 2.693953180  |
| C  | 1.804465540  | 3.212553720  | 1.443584030  |
| C  | 2.873021380  | 2.618983980  | 0.698605990  |
| C  | -0.964717280 | 3.101569580  | 2.340725050  |
| C  | -0.618025590 | 3.849707170  | 1.140672010  |
| C  | 0.108977130  | 2.621472040  | 3.149146760  |
| C  | -1.230080940 | -0.692589700 | 3.957905960  |
| C  | -1.238988650 | 0.746378130  | 3.960990630  |
| C  | -0.017463890 | 1.438707040  | 3.957886560  |
| C  | -0.011990510 | -1.383490730 | 3.957886680  |
| C  | -3.029320590 | -2.410426960 | 1.156387160  |
| C  | -2.214672670 | -2.331762060 | 2.355892390  |
| C  | -2.332963680 | -1.157484330 | 3.159617020  |
| C  | -0.595173310 | -3.828390460 | 1.176852520  |
| C  | -1.448521060 | -3.947393950 | -0.001437780 |
| C  | -2.688744410 | -3.212234760 | -0.009552060 |
| C  | 0.125077590  | -2.568658600 | 3.169346350  |
| C  | -0.943986920 | -3.064010560 | 2.365990840  |
| C  | 2.873799850  | -2.539302880 | 0.734045060  |
| C  | 1.507603300  | -2.604590930 | 2.725080690  |
| C  | 1.829870310  | -3.173777640 | 1.484800970  |
| C  | 0.781005950  | -3.789623730 | 0.727769540  |
| C  | 1.252844290  | 0.743197170  | 3.997340080  |
| C  | 1.264396250  | -0.680744360 | 3.977837450  |
| C  | 2.205690290  | -1.464907680 | 3.242414090  |
| C  | 3.434830330  | -0.959370740 | 2.593267460  |
| C  | 3.650595190  | -1.429849100 | 1.206204570  |
| C  | 4.475895210  | -0.309729720 | 3.327059290  |
| F  | 4.354875890  | 0.014528710  | 4.601903610  |
| F  | 5.629423960  | 0.055174340  | 2.785823130  |
| Cl | 5.393511480  | -2.645968790 | 3.846891080  |

### 66-3-PHHJ

|    |              |              |              |
|----|--------------|--------------|--------------|
| N  | 0.016939610  | -0.008234240 | 0.125825780  |
| Sc | 2.005992960  | 0.224421720  | 0.293833050  |
| Sc | -0.941807600 | -1.777492680 | 0.036449630  |
| Sc | -0.993145950 | 1.732304490  | -0.026792610 |
| C  | 3.605578170  | 1.361370920  | -1.119974620 |
| C  | 3.125355100  | 0.703764930  | -2.315109690 |

|   |              |              |              |
|---|--------------|--------------|--------------|
| C | 2.204391570  | 1.406835770  | -3.148602640 |
| C | 1.267756680  | 0.695380290  | -3.975912000 |
| C | 1.261006690  | -0.710606030 | -3.980874890 |
| C | 4.217759330  | 0.699029590  | 0.005292120  |
| C | 4.082358070  | -0.726064240 | 0.045160260  |
| C | 3.554137840  | -1.418641560 | -1.120786450 |
| C | 3.119726720  | -0.757624890 | -2.324877890 |
| C | 2.194577750  | -1.443696430 | -3.167184660 |
| C | 2.135262620  | 1.379630770  | 3.222486470  |
| C | 3.193084020  | 0.671220880  | 2.520544570  |
| C | 3.915591810  | 1.533213480  | 1.243411360  |
| C | -1.198559720 | 0.728919080  | -3.995897240 |
| C | -1.205417130 | -0.712443600 | -4.003564330 |
| C | 0.024379300  | 1.423257520  | -3.980845600 |
| C | 0.009473440  | -1.421602390 | -3.992428410 |
| C | 0.150391730  | -2.604179390 | -3.183651630 |
| C | -0.934161290 | -3.080849720 | -2.388605050 |
| C | -0.603375500 | -3.837972720 | -1.190990280 |
| C | 2.895315560  | -2.626884430 | -0.685599670 |
| C | 1.831256870  | -3.200744050 | -1.452710210 |
| C | 1.523750230  | -2.642880070 | -2.707808060 |
| C | 0.765056540  | -3.820093880 | -0.719630690 |
| C | -3.007793070 | 2.432133090  | -1.180966150 |
| C | -2.175248390 | 2.355034220  | -2.372248660 |
| C | -2.298115980 | 1.187451880  | -3.192469190 |
| C | -3.026333000 | 0.012834210  | -2.745009710 |
| C | -3.700182260 | -1.211419870 | -0.750070100 |
| C | -3.668960370 | 0.012006720  | -1.495477810 |
| C | -3.683369490 | 1.230780270  | -0.736988560 |
| C | -2.197927340 | -2.336543530 | -2.397720590 |
| C | -2.312943920 | -1.166802970 | -3.208425180 |
| C | -3.018312080 | -2.404398250 | -1.203880640 |
| C | -0.899869990 | 3.079318030  | -2.357018420 |
| C | 0.178044990  | 2.596988280  | -3.162790160 |
| C | -2.680535950 | 3.221795650  | -0.001065290 |
| C | -1.420961490 | 3.928565030  | 0.020020830  |
| C | -0.559186650 | 3.818560150  | -1.148150170 |
| C | -3.020545410 | 2.411555150  | 1.160887080  |
| C | -2.219305580 | 2.327778690  | 2.371979260  |
| C | -2.368329120 | 1.155150020  | 3.174803040  |
| C | -3.717453650 | -1.221035250 | 0.676584150  |
| C | -3.699860930 | -0.004496640 | 1.435630350  |
| C | -3.694941590 | 1.221029010  | 0.690930030  |
| C | -3.083341140 | -0.015431460 | 2.696930810  |
| C | 0.806320320  | 3.756742450  | -0.673440130 |
| C | 1.848103720  | 3.122396320  | -1.415159100 |
| C | 1.551489470  | 2.612377050  | -2.690049530 |
| C | 2.902887080  | 2.530471430  | -0.653228880 |
| C | 0.806476850  | 3.741579280  | 0.752309430  |

|    |              |              |              |
|----|--------------|--------------|--------------|
| C  | 1.519481170  | 2.590037050  | 2.775985560  |
| C  | 1.872725400  | 3.140576370  | 1.511239150  |
| C  | 2.976055530  | 2.614987140  | 0.770436860  |
| C  | -0.943162990 | 3.052637510  | 2.397897020  |
| C  | -0.572510410 | 3.784224510  | 1.193537460  |
| C  | 0.117250580  | 2.569049940  | 3.211598450  |
| C  | -1.289147050 | -0.753452360 | 3.983302750  |
| C  | -1.282273460 | 0.688424710  | 3.991143440  |
| C  | -0.063307570 | 1.385333910  | 4.002006360  |
| C  | -0.072528570 | -1.463278960 | 3.987696360  |
| C  | -3.050050880 | -2.420464470 | 1.131758370  |
| C  | -2.248318610 | -2.365126790 | 2.341827580  |
| C  | -2.377227340 | -1.199059300 | 3.161400480  |
| C  | -0.624589470 | -3.862413170 | 1.153499870  |
| C  | -1.471344060 | -3.959421210 | -0.029186100 |
| C  | -2.702365510 | -3.210527660 | -0.038573490 |
| C  | 0.086313270  | -2.633856650 | 3.165206980  |
| C  | -0.983837960 | -3.110200080 | 2.349754300  |
| C  | 2.894624840  | -2.646648270 | 0.741062830  |
| C  | 1.468980240  | -2.672123140 | 2.719979950  |
| C  | 1.811837540  | -3.224266810 | 1.468164940  |
| C  | 0.754029640  | -3.831050620 | 0.707205380  |
| C  | 1.177700860  | 0.654547170  | 3.998612190  |
| C  | 1.173938620  | -0.750608650 | 4.000722900  |
| C  | 2.120856390  | -1.473470860 | 3.189521990  |
| C  | 3.101910600  | -0.787645640 | 2.408055840  |
| C  | 3.576353810  | -1.444166930 | 1.211034870  |
| C  | 4.820100570  | 1.610581050  | 2.354495050  |
| F  | 5.787965400  | 0.725842110  | 2.540392130  |
| F  | 4.771142700  | 2.558986940  | 3.271836940  |
| Cl | 6.352569360  | 3.086709780  | 0.729134830  |

### 66-3-THJ

|    |              |              |              |
|----|--------------|--------------|--------------|
| N  | 0.021021390  | 0.011571020  | 0.056741980  |
| Sc | 2.032067040  | 0.139764030  | 0.137206630  |
| Sc | -0.940542460 | -1.755146340 | 0.029347950  |
| Sc | -0.995740110 | 1.749067160  | -0.022015570 |
| C  | 3.582430680  | 1.412759050  | -1.226622970 |
| C  | 3.102307900  | 0.737722460  | -2.417337550 |
| C  | 2.152770880  | 1.423448700  | -3.231361240 |
| C  | 1.207681910  | 0.692445500  | -4.031518710 |
| C  | 1.215761210  | -0.714041610 | -4.017826670 |
| C  | 4.172893470  | 0.759596540  | -0.079327440 |
| C  | 4.137640390  | -0.678009510 | -0.035518660 |
| C  | 3.580185440  | -1.369953010 | -1.191375440 |
| C  | 3.108981820  | -0.723479780 | -2.397292330 |
| C  | 2.168882940  | -1.429125480 | -3.211936040 |

|   |              |              |              |
|---|--------------|--------------|--------------|
| C | 2.206230730  | 1.468335500  | 3.191286380  |
| C | 3.388708940  | 0.771657020  | 2.582114120  |
| C | 3.774866520  | 1.535294660  | 1.101381950  |
| C | -1.258934790 | 0.698900120  | -4.016582490 |
| C | -1.250187770 | -0.741933860 | -4.005932650 |
| C | -0.043239950 | 1.407115520  | -4.026115340 |
| C | -0.028477650 | -1.439502030 | -4.005627180 |
| C | 0.136217180  | -2.612597470 | -3.190019250 |
| C | -0.931854930 | -3.090736170 | -2.371737630 |
| C | -0.576615120 | -3.829867800 | -1.169943380 |
| C | 2.908390440  | -2.560324040 | -0.728321420 |
| C | 1.844553650  | -3.163340800 | -1.474434290 |
| C | 1.518245060  | -2.631491450 | -2.734912310 |
| C | 0.798776710  | -3.789752730 | -0.718918120 |
| C | -3.039586450 | 2.405588880  | -1.191708280 |
| C | -2.228304390 | 2.328578300  | -2.394689220 |
| C | -2.351719410 | 1.153984670  | -3.201862480 |
| C | -3.061352220 | -0.023290250 | -2.730943550 |
| C | -3.694379650 | -1.234078320 | -0.713363450 |
| C | -3.686238520 | -0.018500390 | -1.471287520 |
| C | -3.703716650 | 1.206737490  | -0.725748990 |
| C | -2.203545600 | -2.360515800 | -2.368326650 |
| C | -2.341505320 | -1.198555800 | -3.189935550 |
| C | -3.009871840 | -2.426535410 | -1.164290260 |
| C | -0.961359950 | 3.069203660  | -2.405802800 |
| C | 0.109005930  | 2.592170820  | -3.225871890 |
| C | -2.707133100 | 3.215266620  | -0.027797280 |
| C | -1.460765250 | 3.942210100  | -0.036345600 |
| C | -0.613898280 | 3.824245270  | -1.211358000 |
| C | -3.026327960 | 2.418749220  | 1.148556860  |
| C | -2.200467300 | 2.353227820  | 2.343579570  |
| C | -2.317836030 | 1.187531560  | 3.159105370  |
| C | -3.689143220 | -1.227989740 | 0.714379420  |
| C | -3.671002510 | -0.002784850 | 1.459796310  |
| C | -3.695588350 | 1.214668250  | 0.702208280  |
| C | -3.033339240 | 0.005726700  | 2.711271480  |
| C | 0.762935360  | 3.797051090  | -0.758197890 |
| C | 1.799491840  | 3.172480010  | -1.517122820 |
| C | 1.489842340  | 2.631970580  | -2.774274500 |
| C | 2.865144130  | 2.581641310  | -0.763184510 |
| C | 0.781407840  | 3.798061660  | 0.670826990  |
| C | 1.545017820  | 2.627460340  | 2.677798880  |
| C | 1.856135370  | 3.210792500  | 1.424827580  |
| C | 2.916164440  | 2.623654310  | 0.660005410  |
| C | -0.926107940 | 3.085923000  | 2.334903310  |
| C | -0.591086500 | 3.829027270  | 1.130140470  |
| C | 0.149137890  | 2.611384680  | 3.137354050  |
| C | -1.212212060 | -0.700459750 | 3.982705010  |
| C | -1.214961980 | 0.739169860  | 3.964312750  |

|    |              |              |             |
|----|--------------|--------------|-------------|
| C  | -0.001818180 | 1.442124760  | 3.944393080 |
| C  | 0.015937130  | -1.389033390 | 3.976136810 |
| C  | -3.005067260 | -2.416717080 | 1.173664270 |
| C  | -2.186583250 | -2.339643590 | 2.372349350 |
| C  | -2.307269050 | -1.164944410 | 3.178125960 |
| C  | -0.562791480 | -3.824119330 | 1.174138050 |
| C  | -1.426229150 | -3.947717550 | 0.005822330 |
| C  | -2.670811690 | -3.218041060 | 0.007481040 |
| C  | 0.164394980  | -2.568087870 | 3.163179260 |
| C  | -0.910403690 | -3.066967100 | 2.370159100 |
| C  | 2.924367580  | -2.554748750 | 0.698338400 |
| C  | 1.534983390  | -2.585626470 | 2.689232050 |
| C  | 1.862082350  | -3.147243750 | 1.446989930 |
| C  | 0.806786680  | -3.783331950 | 0.706792180 |
| C  | 1.256193850  | 0.732130190  | 3.949207630 |
| C  | 1.261437510  | -0.674042940 | 3.984823690 |
| C  | 2.192620690  | -1.381690630 | 3.145007860 |
| C  | 3.195795670  | -0.727684180 | 2.382114740 |
| C  | 3.625018200  | -1.362415060 | 1.158307750 |
| C  | 4.699750730  | 1.369476950  | 2.662250420 |
| F  | 4.894395390  | 2.594050720  | 3.127023440 |
| F  | 5.815240930  | 0.741996520  | 2.315740250 |
| Cl | 4.915028770  | 0.289601040  | 5.103310340 |

#### 66-4-THJ

|    |              |              |              |
|----|--------------|--------------|--------------|
| N  | -0.017920810 | 0.004276260  | -0.018063740 |
| Sc | 2.014831870  | -0.011079600 | -0.091368960 |
| Sc | -0.978349240 | -1.750300000 | 0.013967250  |
| Sc | -0.965398270 | 1.763624290  | 0.008509280  |
| C  | 3.607414400  | 1.424351510  | -1.128496640 |
| C  | 3.143231510  | 0.747292710  | -2.326982220 |
| C  | 2.188110810  | 1.433746630  | -3.147735160 |
| C  | 1.258721170  | 0.707954890  | -3.965651660 |
| C  | 1.266422710  | -0.698858030 | -3.967463340 |
| C  | 4.126155870  | 0.743793170  | 0.051794740  |
| C  | 4.149529010  | -0.699657730 | 0.041515840  |
| C  | 3.642109210  | -1.390728340 | -1.137131140 |
| C  | 3.155384570  | -0.719881560 | -2.329349620 |
| C  | 2.205071430  | -1.418848150 | -3.155207030 |
| C  | 2.178017850  | 1.526321060  | 3.332179610  |
| C  | 3.361836970  | 0.786505870  | 2.558413000  |
| C  | 3.584083350  | 1.416844060  | 1.205623900  |
| C  | -1.207503170 | 0.714193490  | -3.999492930 |
| C  | -1.199720610 | -0.725677660 | -3.996611290 |
| C  | 0.006499930  | 1.423520930  | -3.983640390 |
| C  | 0.019783990  | -1.424608630 | -3.983180610 |
| C  | 0.171114280  | -2.605553400 | -3.179720260 |



|   |              |              |              |
|---|--------------|--------------|--------------|
| C | -0.908284330 | -3.085567540 | -2.376888970 |
| C | -0.570776290 | -3.826986020 | -1.170951180 |
| C | 2.914839850  | -2.564415880 | -0.687112220 |
| C | 1.855935640  | -3.163048330 | -1.445059970 |
| C | 1.550702420  | -2.630563930 | -2.710428600 |
| C | 0.799367420  | -3.788880180 | -0.702088330 |
| C | -3.034572250 | 2.398849560  | -1.198505710 |
| C | -2.207108490 | 2.334099590  | -2.390379720 |
| C | -2.316986280 | 1.165030970  | -3.202801500 |
| C | -3.033067980 | -0.014763700 | -2.747597970 |
| C | -3.698806080 | -1.237697030 | -0.747722000 |
| C | -3.681759010 | -0.017481830 | -1.499082420 |
| C | -3.717198760 | 1.203221370  | -0.750200250 |
| C | -2.181469660 | -2.355265010 | -2.384606340 |
| C | -2.304176580 | -1.185743640 | -3.198343830 |
| C | -3.009557490 | -2.429441800 | -1.193840860 |
| C | -0.941883880 | 3.079114970  | -2.379087540 |
| C | 0.144913340  | 2.604687100  | -3.177788370 |
| C | -2.719150560 | 3.201962510  | -0.028495680 |
| C | -1.486005900 | 3.949813810  | -0.018366490 |
| C | -0.614559720 | 3.829874170  | -1.176669420 |
| C | -3.063601940 | 2.404745140  | 1.137027950  |
| C | -2.256691380 | 2.339415320  | 2.343350240  |
| C | -2.380584290 | 1.171321310  | 3.155894860  |
| C | -3.712086340 | -1.236832720 | 0.680922170  |
| C | -3.709559770 | -0.014792120 | 1.430295210  |
| C | -3.732009470 | 1.205516760  | 0.677276630  |
| C | -3.087014620 | -0.009463360 | 2.691528540  |
| C | 0.753279870  | 3.800718340  | -0.699949280 |
| C | 1.812057700  | 3.176304250  | -1.437068480 |
| C | 1.519704890  | 2.641834090  | -2.701363850 |
| C | 2.866607900  | 2.580820950  | -0.672590130 |
| C | 0.741613390  | 3.802346170  | 0.728837360  |
| C | 1.468281150  | 2.663598450  | 2.753029390  |
| C | 1.793442420  | 3.203407510  | 1.501254690  |
| C | 2.844395690  | 2.559621820  | 0.754989800  |
| C | -0.991338210 | 3.080365160  | 2.350932300  |
| C | -0.637716630 | 3.841152050  | 1.167128070  |
| C | 0.084662590  | 2.599836540  | 3.167222240  |
| C | -1.279736310 | -0.714466930 | 3.982811080  |
| C | -1.289131570 | 0.722366580  | 3.975257780  |
| C | -0.071598010 | 1.424541160  | 3.978512260  |
| C | -0.048607100 | -1.394134920 | 3.986066630  |
| C | -3.035691560 | -2.429669570 | 1.145527230  |
| C | -2.229805550 | -2.350233780 | 2.352995670  |
| C | -2.364574250 | -1.179801460 | 3.160514420  |
| C | -0.589522670 | -3.825670060 | 1.172591820  |
| C | -1.437449420 | -3.949185030 | -0.008349700 |
| C | -2.688477800 | -3.228029680 | -0.019443170 |

|    |              |              |             |
|----|--------------|--------------|-------------|
| C  | 0.115565130  | -2.569416550 | 3.174850970 |
| C  | -0.948667190 | -3.069744640 | 2.364026720 |
| C  | 2.884092770  | -2.544713030 | 0.738870810 |
| C  | 1.495111150  | -2.585900150 | 2.722595140 |
| C  | 1.825661810  | -3.147977560 | 1.479440520 |
| C  | 0.785375380  | -3.785102400 | 0.724719120 |
| C  | 1.185367690  | 0.729724680  | 4.024010100 |
| C  | 1.197907000  | -0.670846480 | 4.019313930 |
| C  | 2.151601010  | -1.381032050 | 3.184242490 |
| C  | 3.143428260  | -0.723855960 | 2.416276460 |
| C  | 3.577134370  | -1.361352100 | 1.204899560 |
| C  | 3.975186380  | 1.371539830  | 3.743416890 |
| F  | 4.058281770  | 0.753276200  | 4.909057430 |
| F  | 4.525894430  | 2.575930770  | 3.738374220 |
| Cl | 6.324182740  | 0.185446150  | 2.995479870 |

#### 66-4-PHHJ

|    |              |              |              |
|----|--------------|--------------|--------------|
| N  | 0.019054950  | -0.007272170 | -0.001881480 |
| Sc | 2.041071060  | 0.080875180  | -0.008983860 |
| Sc | -0.910718620 | -1.784277970 | -0.012900790 |
| Sc | -0.955702810 | 1.744281280  | 0.011103880  |
| C  | 3.634038140  | 1.370993960  | -1.232395200 |
| C  | 3.133455320  | 0.700440070  | -2.423231400 |
| C  | 2.174307250  | 1.399935910  | -3.220894620 |
| C  | 1.215149830  | 0.685583170  | -4.016435290 |
| C  | 1.206010350  | -0.719603030 | -4.024147600 |
| C  | 4.182482680  | 0.685456910  | -0.065372640 |
| C  | 4.138920130  | -0.760939510 | -0.071418600 |
| C  | 3.591268400  | -1.438164730 | -1.230507680 |
| C  | 3.118391400  | -0.765527760 | -2.426058830 |
| C  | 2.155086390  | -1.452603730 | -3.231825610 |
| C  | 2.378750900  | 1.511034500  | 3.354086630  |
| C  | 3.318530040  | 0.685174680  | 2.372233470  |
| C  | 3.668395030  | 1.362593110  | 1.112516770  |
| C  | -1.249672120 | 0.723233990  | -3.995505050 |
| C  | -1.259230450 | -0.716704490 | -3.998502180 |
| C  | -0.028166810 | 1.416954200  | -4.002595720 |
| C  | -0.048009680 | -1.431444900 | -4.012565290 |
| C  | 0.106897610  | -2.613284030 | -3.212239490 |
| C  | -0.962536390 | -3.085534810 | -2.390659390 |
| C  | -0.611409850 | -3.844410920 | -1.197777630 |
| C  | 2.896586520  | -2.625318330 | -0.774170030 |
| C  | 1.818550230  | -3.203726950 | -1.516643440 |
| C  | 1.496123430  | -2.659386950 | -2.771260020 |
| C  | 0.766995030  | -3.816850310 | -0.752785630 |
| C  | -3.004039640 | 2.426963760  | -1.153330560 |
| C  | -2.197759650 | 2.352928580  | -2.361925950 |

|   |              |              |              |
|---|--------------|--------------|--------------|
| C | -2.338715110 | 1.184608650  | -3.174068170 |
| C | -3.060260120 | 0.014462660  | -2.712133130 |
| C | -3.704222770 | -1.207012290 | -0.701952400 |
| C | -3.682756270 | 0.014525620  | -1.448674040 |
| C | -3.685948230 | 1.233212540  | -0.695875390 |
| C | -2.225064860 | -2.336416130 | -2.372084580 |
| C | -2.352050090 | -1.164850110 | -3.180295350 |
| C | -3.026216190 | -2.400237740 | -1.163871870 |
| C | -0.922165960 | 3.077074030  | -2.373119650 |
| C | 0.143030540  | 2.595660360  | -3.198789260 |
| C | -2.659898810 | 3.222393970  | 0.013342900  |
| C | -1.407038310 | 3.944820980  | 0.002731280  |
| C | -0.559764150 | 3.814150060  | -1.173598400 |
| C | -2.987164090 | 2.422671190  | 1.184448320  |
| C | -2.151262060 | 2.335383200  | 2.370434730  |
| C | -2.270118120 | 1.167215010  | 3.176777700  |
| C | -3.687540700 | -1.210900790 | 0.726073960  |
| C | -3.654571350 | 0.006115140  | 1.479542200  |
| C | -3.673185210 | 1.230402620  | 0.732260700  |
| C | -3.003538770 | -0.001815960 | 2.727424870  |
| C | 0.816388060  | 3.765473060  | -0.726773380 |
| C | 1.857636690  | 3.144696130  | -1.495959280 |
| C | 1.527335640  | 2.614599910  | -2.752098690 |
| C | 2.920803570  | 2.535006480  | -0.755527610 |
| C | 0.829636620  | 3.752603930  | 0.699525140  |
| C | 1.596775840  | 2.665526990  | 2.735675610  |
| C | 1.889510710  | 3.142197170  | 1.461762010  |
| C | 2.938254660  | 2.516317140  | 0.678105690  |
| C | -0.868684110 | 3.049710050  | 2.353554450  |
| C | -0.535095480 | 3.811124770  | 1.164977390  |
| C | 0.219667240  | 2.560543210  | 3.140581250  |
| C | -1.173708390 | -0.731322480 | 3.967583300  |
| C | -1.161775910 | 0.703253460  | 3.965797900  |
| C | 0.066541800  | 1.383232610  | 3.949399950  |
| C | 0.041179860  | -1.428619320 | 3.944222350  |
| C | -3.003087830 | -2.407371870 | 1.170105970  |
| C | -2.176789330 | -2.347795260 | 2.361666040  |
| C | -2.287924660 | -1.182652990 | 3.177146150  |
| C | -0.583449550 | -3.849599180 | 1.148431620  |
| C | -1.456727320 | -3.957843250 | -0.017793720 |
| C | -2.685668500 | -3.202233910 | -0.002704870 |
| C | 0.180238010  | -2.606800660 | 3.137676330  |
| C | -0.908132620 | -3.089558930 | 2.346324940  |
| C | 2.909175550  | -2.628237120 | 0.653441950  |
| C | 1.557549370  | -2.652271250 | 2.671017400  |
| C | 1.856658090  | -3.220925660 | 1.419838530  |
| C | 0.783438930  | -3.819000270 | 0.675947860  |
| C | 1.304926760  | 0.677718430  | 4.014169720  |
| C | 1.295807750  | -0.710636850 | 3.949263220  |

|    |             |              |             |
|----|-------------|--------------|-------------|
| C  | 2.240581060 | -1.461278740 | 3.134750340 |
| C  | 3.173510220 | -0.779408510 | 2.309687080 |
| C  | 3.611902610 | -1.447744270 | 1.105074890 |
| C  | 3.691197880 | 1.651401160  | 3.958380610 |
| F  | 4.555831530 | 2.593011740  | 3.612297940 |
| F  | 4.151215460 | 0.816553530  | 4.877768170 |
| Cl | 2.562296300 | 3.294428750  | 5.769088080 |

#### 66-5-PHHJ

|    |              |              |              |
|----|--------------|--------------|--------------|
| N  | -0.023937800 | -0.014058340 | -0.018263920 |
| Sc | 1.970947840  | -0.132933230 | 0.010204440  |
| Sc | -1.082291790 | -1.708240380 | 0.002794770  |
| Sc | -0.849808040 | 1.824366910  | -0.046097510 |
| C  | 3.543759190  | 1.454934540  | -1.132638590 |
| C  | 3.093324230  | 0.768948770  | -2.321445910 |
| C  | 2.152491810  | 1.451865950  | -3.150244060 |
| C  | 1.228014690  | 0.722940780  | -3.972627810 |
| C  | 1.247478820  | -0.684663520 | -3.977987550 |
| C  | 4.078510280  | 0.762719480  | 0.026562780  |
| C  | 4.132291440  | -0.671352680 | 0.016581020  |
| C  | 3.625908460  | -1.371861650 | -1.158417010 |
| C  | 3.130481360  | -0.697529340 | -2.343567480 |
| C  | 2.195583160  | -1.398059480 | -3.168231270 |
| C  | 2.142728340  | 1.465894620  | 3.201477910  |
| C  | 3.099420290  | 0.783096640  | 2.357532370  |
| C  | 3.616911060  | 1.449533330  | 1.203204280  |
| C  | -1.233101140 | 0.713944230  | -3.981579300 |
| C  | -1.216759720 | -0.726715360 | -3.987861900 |
| C  | -0.024541260 | 1.429121660  | -3.967807710 |
| C  | 0.008504270  | -1.418197230 | -3.985720490 |
| C  | 0.170386180  | -2.599090190 | -3.182781500 |
| C  | -0.901448140 | -3.085113580 | -2.373933310 |
| C  | -0.551370130 | -3.821750520 | -1.173219690 |
| C  | 2.921767000  | -2.551408970 | -0.701796880 |
| C  | 1.864154630  | -3.165173010 | -1.461119520 |
| C  | 1.547736230  | -2.618970980 | -2.714985710 |
| C  | 0.822109560  | -3.803776450 | -0.712825710 |
| C  | -3.049203250 | 2.368779970  | -1.167738270 |
| C  | -2.229207980 | 2.323679050  | -2.359312680 |
| C  | -2.342987260 | 1.156674330  | -3.182108440 |
| C  | -3.045509610 | -0.025731230 | -2.723683250 |
| C  | -3.692525090 | -1.265537960 | -0.729852110 |
| C  | -3.697098100 | -0.038201220 | -1.476360340 |
| C  | -3.743422430 | 1.178137410  | -0.723412100 |
| C  | -2.185031590 | -2.370039040 | -2.379442840 |
| C  | -2.312004110 | -1.195513200 | -3.182127870 |
| C  | -3.018363470 | -2.463031690 | -1.188131620 |

|    |              |              |              |
|----|--------------|--------------|--------------|
| C  | -0.974464850 | 3.085909710  | -2.352276010 |
| C  | 0.118145240  | 2.607343990  | -3.148756870 |
| C  | -2.711846340 | 3.158537610  | 0.001579190  |
| C  | -1.505236390 | 3.946625980  | 0.006904570  |
| C  | -0.638682130 | 3.860595630  | -1.165366130 |
| C  | -3.050797930 | 2.358478470  | 1.161824660  |
| C  | -2.248807170 | 2.302779640  | 2.365521180  |
| C  | -2.372012160 | 1.135716180  | 3.182971820  |
| C  | -3.696476670 | -1.270647980 | 0.698750910  |
| C  | -3.704701880 | -0.045584410 | 1.453066080  |
| C  | -3.745075670 | 1.173193380  | 0.705468510  |
| C  | -3.072025740 | -0.043227190 | 2.709419420  |
| C  | 0.735070850  | 3.823725090  | -0.689280630 |
| C  | 1.826567040  | 3.208170650  | -1.429133420 |
| C  | 1.486860800  | 2.647747850  | -2.684822550 |
| C  | 2.931763680  | 2.687108880  | -0.723836060 |
| C  | 0.723218380  | 3.804471720  | 0.730914410  |
| C  | 1.464211450  | 2.635661830  | 2.741170880  |
| C  | 1.814110870  | 3.317454720  | 1.537675140  |
| C  | 3.109319610  | 2.814294450  | 0.769721890  |
| C  | -0.991132110 | 3.053662410  | 2.371767240  |
| C  | -0.648594480 | 3.825877280  | 1.182956870  |
| C  | 0.087667190  | 2.577661010  | 3.177596990  |
| C  | -1.255902660 | -0.750614380 | 3.988457120  |
| C  | -1.270932390 | 0.688505250  | 3.991879360  |
| C  | -0.060579700 | 1.400435460  | 3.994147860  |
| C  | -0.025409600 | -1.430778680 | 3.982247340  |
| C  | -3.031677610 | -2.470538640 | 1.157814460  |
| C  | -2.207217420 | -2.384145730 | 2.359072870  |
| C  | -2.342219850 | -1.215541740 | 3.167352260  |
| C  | -0.561017920 | -3.828696440 | 1.161131730  |
| C  | -1.414575930 | -3.946759230 | -0.010775080 |
| C  | -2.687056640 | -3.265184430 | -0.015759340 |
| C  | 0.145539680  | -2.606457810 | 3.176559040  |
| C  | -0.921552150 | -3.094599810 | 2.359361670  |
| C  | 2.917378990  | -2.554389220 | 0.726526200  |
| C  | 1.525691150  | -2.621600960 | 2.719000530  |
| C  | 1.854701240  | -3.175680070 | 1.473626720  |
| C  | 0.817193340  | -3.808525770 | 0.714550940  |
| C  | 1.196467710  | 0.706870960  | 3.994358600  |
| C  | 1.214018600  | -0.692614280 | 3.989036770  |
| C  | 2.171872670  | -1.401463300 | 3.179044770  |
| C  | 3.112653310  | -0.696544670 | 2.368440390  |
| C  | 3.617604160  | -1.372732900 | 1.190192100  |
| C  | 3.513453640  | 4.051196670  | 1.398981030  |
| F  | 4.031910800  | 4.118449860  | 2.612740440  |
| F  | 3.421525130  | 5.223046330  | 0.789205750  |
| Cl | 6.013626360  | 3.563416820  | 0.297590120  |

**66-5-THJ**

|    |              |              |              |
|----|--------------|--------------|--------------|
| N  | 0.015407710  | -0.042116190 | 0.092617820  |
| Sc | 1.992962100  | -0.224866300 | 0.101779690  |
| Sc | -1.108822840 | -1.697511230 | 0.020808570  |
| Sc | -0.774785010 | 1.817885530  | 0.184229340  |
| C  | 3.583397540  | 1.365036490  | -1.171049040 |
| C  | 3.128143230  | 0.699248210  | -2.372614890 |
| C  | 2.192753100  | 1.403463660  | -3.184324380 |
| C  | 1.243230060  | 0.687449550  | -3.998144020 |
| C  | 1.238937690  | -0.717264380 | -3.999571760 |
| C  | 4.107364570  | 0.663295010  | -0.005027060 |
| C  | 4.157671930  | -0.773951210 | -0.016412300 |
| C  | 3.612947640  | -1.445912880 | -1.189287800 |
| C  | 3.133585110  | -0.765618150 | -2.382946380 |
| C  | 2.181183880  | -1.449697520 | -3.196792940 |
| C  | 2.200113700  | 1.401562670  | 3.153480230  |
| C  | 3.165528340  | 0.693053250  | 2.352135880  |
| C  | 3.637831890  | 1.363890330  | 1.162409150  |
| C  | -1.218417180 | 0.719562330  | -3.993816470 |
| C  | -1.226301140 | -0.721594360 | -3.994758250 |
| C  | 0.002917660  | 1.414806090  | -3.990401250 |
| C  | -0.014331410 | -1.432464250 | -3.999799470 |
| C  | 0.133465170  | -2.615575660 | -3.200068860 |
| C  | -0.941720890 | -3.084158480 | -2.384017710 |
| C  | -0.597251630 | -3.825997990 | -1.186597070 |
| C  | 2.890913770  | -2.609646580 | -0.731223080 |
| C  | 1.824017360  | -3.210282730 | -1.487217700 |
| C  | 1.512740170  | -2.658130950 | -2.739316340 |
| C  | 0.778189910  | -3.836918210 | -0.734726370 |
| C  | -2.966833630 | 2.391703540  | -1.155810180 |
| C  | -2.169738090 | 2.334208270  | -2.358142170 |
| C  | -2.313749210 | 1.179567060  | -3.185487240 |
| C  | -3.035499320 | 0.008614850  | -2.720032730 |
| C  | -3.685121000 | -1.220645590 | -0.719543360 |
| C  | -3.671225500 | 0.009062480  | -1.465410260 |
| C  | -3.691406620 | 1.222788910  | -0.709835460 |
| C  | -2.212790860 | -2.349659990 | -2.381583400 |
| C  | -2.325558150 | -1.172853690 | -3.182734560 |
| C  | -3.041234880 | -2.430815680 | -1.185160020 |
| C  | -0.897883000 | 3.063424470  | -2.353632050 |
| C  | 0.169531380  | 2.588546700  | -3.170485040 |
| C  | -2.619423020 | 3.179357900  | 0.008880610  |
| C  | -1.402110520 | 3.945854940  | 0.012151190  |
| C  | -0.546679950 | 3.805187770  | -1.153812480 |
| C  | -2.985687170 | 2.399307810  | 1.175349580  |
| C  | -2.164892400 | 2.336899300  | 2.368612440  |
| C  | -2.304487150 | 1.157505950  | 3.181055090  |

|    |              |              |              |
|----|--------------|--------------|--------------|
| C  | -3.686056200 | -1.226640900 | 0.708651730  |
| C  | -3.673530450 | -0.002010080 | 1.464058670  |
| C  | -3.694527490 | 1.220647910  | 0.719261010  |
| C  | -3.026060140 | -0.008251780 | 2.711418600  |
| C  | 0.824389420  | 3.768696880  | -0.683771810 |
| C  | 1.889795860  | 3.166121450  | -1.456893460 |
| C  | 1.546380020  | 2.609161830  | -2.708679030 |
| C  | 2.962689420  | 2.580107090  | -0.729225230 |
| C  | 0.814864670  | 3.826527580  | 0.732617610  |
| C  | 1.560303320  | 2.607753590  | 2.738514220  |
| C  | 1.980594120  | 3.411754270  | 1.568955780  |
| C  | 3.076287140  | 2.636683910  | 0.714909630  |
| C  | -0.904754790 | 3.083794660  | 2.375345440  |
| C  | -0.546181640 | 3.869462340  | 1.195492850  |
| C  | 0.191062240  | 2.553029150  | 3.140516390  |
| C  | -1.214604290 | -0.752207230 | 3.972502990  |
| C  | -1.205315350 | 0.688608910  | 3.971931890  |
| C  | 0.017750080  | 1.375503210  | 3.961313740  |
| C  | 0.000205900  | -1.458241450 | 3.964388470  |
| C  | -3.045155970 | -2.444092270 | 1.162336930  |
| C  | -2.208750730 | -2.370496090 | 2.356498380  |
| C  | -2.315842200 | -1.197595820 | 3.163336530  |
| C  | -0.593328940 | -3.840509530 | 1.146188680  |
| C  | -1.456244920 | -3.938217940 | -0.021622990 |
| C  | -2.720194730 | -3.242637960 | -0.017167300 |
| C  | 0.144767870  | -2.638444860 | 3.160994350  |
| C  | -0.935119500 | -3.105165120 | 2.349182070  |
| C  | 2.905874640  | -2.624937740 | 0.699636920  |
| C  | 1.522866220  | -2.676585900 | 2.696842690  |
| C  | 1.835204420  | -3.234458300 | 1.449217030  |
| C  | 0.782375770  | -3.846046220 | 0.692649970  |
| C  | 1.253731440  | 0.659487590  | 3.963941930  |
| C  | 1.252781360  | -0.742293720 | 3.958536720  |
| C  | 2.196657500  | -1.472871140 | 3.159985540  |
| C  | 3.160917530  | -0.779789720 | 2.352741290  |
| C  | 3.650602510  | -1.473103780 | 1.167044140  |
| C  | 3.202337130  | 4.201031880  | 1.585046550  |
| F  | 3.485663800  | 5.139502050  | 0.693462010  |
| F  | 4.092275610  | 4.118309420  | 2.561994920  |
| Cl | 1.677635680  | 6.143978550  | 2.938855610  |

#### 66-6-THJ

|    |              |              |              |
|----|--------------|--------------|--------------|
| N  | -0.000185910 | -0.020069350 | 0.107530960  |
| Sc | 2.002491410  | 0.147638010  | 0.168073600  |
| Sc | -0.996695570 | -1.746133090 | -0.025531620 |
| Sc | -0.856110020 | 1.798246760  | 0.168106410  |
| C  | 3.609471480  | 1.389092900  | -1.116024000 |

|   |              |              |              |
|---|--------------|--------------|--------------|
| C | 3.147298190  | 0.734127400  | -2.329058440 |
| C | 2.204836190  | 1.436333730  | -3.138303780 |
| C | 1.262657680  | 0.722355280  | -3.955645970 |
| C | 1.262877160  | -0.680118530 | -3.979508140 |
| C | 4.152604370  | 0.706828600  | 0.049886130  |
| C | 4.106171420  | -0.734260970 | 0.031660680  |
| C | 3.588473170  | -1.408877840 | -1.142791070 |
| C | 3.142484110  | -0.730734630 | -2.343993810 |
| C | 2.203535000  | -1.414347170 | -3.171802760 |
| C | 2.163382940  | 1.366692340  | 3.220032260  |
| C | 3.142550500  | 0.691292290  | 2.423553510  |
| C | 3.638970780  | 1.400825470  | 1.232797550  |
| C | -1.203423680 | 0.743897940  | -3.979475160 |
| C | -1.203095110 | -0.697110990 | -3.993562880 |
| C | 0.011314960  | 1.444865990  | -3.955625270 |
| C | 0.014711110  | -1.400253930 | -3.993571930 |
| C | 0.164857670  | -2.583902730 | -3.193919020 |
| C | -0.915952590 | -3.073513510 | -2.397873080 |
| C | -0.576008870 | -3.835391740 | -1.207462460 |
| C | 2.917874480  | -2.615011560 | -0.711614620 |
| C | 1.854114760  | -3.190776820 | -1.475511380 |
| C | 1.541912890  | -2.623919370 | -2.725306230 |
| C | 0.794190870  | -3.821931190 | -0.741270290 |
| C | -2.997160320 | 2.393610250  | -1.142682080 |
| C | -2.186923520 | 2.346416290  | -2.343916210 |
| C | -2.309572460 | 1.191473830  | -3.171743410 |
| C | -3.026363310 | 0.013743350  | -2.725265730 |
| C | -3.689989880 | -1.232758470 | -0.741194650 |
| C | -3.673329210 | 0.000729140  | -1.475441960 |
| C | -3.706477340 | 1.209836190  | -0.711504490 |
| C | -2.186912430 | -2.339688290 | -2.397860370 |
| C | -2.303258100 | -1.158862070 | -3.193899270 |
| C | -3.016634070 | -2.426161360 | -1.207404890 |
| C | -0.920667960 | 3.082930050  | -2.328994830 |
| C | 0.158645350  | 2.617780330  | -3.138268860 |
| C | -2.671665670 | 3.179210080  | 0.031775130  |
| C | -1.446832490 | 3.939906850  | 0.049974410  |
| C | -0.584451510 | 3.810634270  | -1.115963060 |
| C | -3.030555280 | 2.379120450  | 1.189512920  |
| C | -2.214455650 | 2.304243620  | 2.389301960  |
| C | -2.350667110 | 1.115811140  | 3.183478390  |
| C | -3.701668280 | -1.248677770 | 0.685765700  |
| C | -3.698933190 | -0.034388350 | 1.450040010  |
| C | -3.720262080 | 1.195222370  | 0.717949930  |
| C | -3.064839490 | -0.049527890 | 2.706116520  |
| C | 0.780175750  | 3.764513080  | -0.644177110 |
| C | 1.844557530  | 3.174946900  | -1.408151480 |
| C | 1.534724320  | 2.638383410  | -2.660640680 |
| C | 2.887309200  | 2.547879400  | -0.644208500 |



|    |              |              |              |
|----|--------------|--------------|--------------|
| C  | 0.770058210  | 3.787941480  | 0.770701420  |
| C  | 1.536343760  | 2.640995140  | 2.872464240  |
| C  | 1.956888100  | 3.369416520  | 1.577724390  |
| C  | 2.912698270  | 2.550813580  | 0.770667580  |
| C  | -0.955245520 | 3.057318730  | 2.423620100  |
| C  | -0.588977910 | 3.842011350  | 1.232870380  |
| C  | 0.119250070  | 2.546940910  | 3.220053200  |
| C  | -1.257611620 | -0.791417360 | 3.976511190  |
| C  | -1.259411750 | 0.648431260  | 3.987652490  |
| C  | -0.043034640 | 1.350305530  | 3.984311020  |
| C  | -0.039389830 | -1.494805720 | 3.976490670  |
| C  | -3.029825420 | -2.451427630 | 1.131109200  |
| C  | -2.219763840 | -2.395730930 | 2.336356560  |
| C  | -2.349840730 | -1.235433430 | 3.158542300  |
| C  | -0.591298620 | -3.859603020 | 1.131093400  |
| C  | -1.442277370 | -3.959166200 | -0.045048490 |
| C  | -2.690722760 | -3.238282310 | -0.045017230 |
| C  | 0.122108530  | -2.662728600 | 3.158499640  |
| C  | -0.947830210 | -3.129955620 | 2.336277240  |
| C  | 2.912147120  | -2.634295580 | 0.717828840  |
| C  | 1.506594060  | -2.689030800 | 2.706032430  |
| C  | 1.836583080  | -3.230596770 | 1.449922080  |
| C  | 0.786253610  | -3.840070840 | 0.685699100  |
| C  | 1.208198530  | 0.627859810  | 3.984296340  |
| C  | 1.208487760  | -0.776500920 | 3.987612960  |
| C  | 2.158820990  | -1.487916370 | 3.183409070  |
| C  | 3.119966760  | -0.775752160 | 2.389214490  |
| C  | 3.592712290  | -1.445106100 | 1.189403430  |
| C  | 2.455440350  | 4.232934990  | 2.644859570  |
| F  | 3.663387810  | 4.107947270  | 3.170187530  |
| F  | 1.743186910  | 5.216515400  | 3.170218170  |
| Cl | 3.411794420  | 5.889588540  | 0.681800380  |

#### 66-6-PHHJ

|    |              |              |              |
|----|--------------|--------------|--------------|
| N  | 0.013764380  | 0.004436260  | 0.011512500  |
| Sc | 2.025716630  | 0.143160900  | 0.053205210  |
| Sc | -0.983649420 | -1.724163200 | -0.028976420 |
| Sc | -0.872534460 | 1.815981360  | 0.053303160  |
| C  | 3.614444050  | 1.376893080  | -1.244260260 |
| C  | 3.128170720  | 0.693721440  | -2.434718090 |
| C  | 2.171099620  | 1.376756380  | -3.247955930 |
| C  | 1.218260070  | 0.645766530  | -4.034968940 |
| C  | 1.218573430  | -0.759603090 | -4.024516960 |
| C  | 4.169465870  | 0.723803830  | -0.068588860 |
| C  | 4.128592460  | -0.716779150 | -0.053327340 |
| C  | 3.590156780  | -1.419787570 | -1.205537650 |
| C  | 3.122854350  | -0.770211660 | -2.414645260 |

|   |              |              |              |
|---|--------------|--------------|--------------|
| C | 2.168403600  | -1.472865240 | -3.213349420 |
| C | 2.247236470  | 1.460431110  | 3.152008390  |
| C | 3.174437660  | 0.774331910  | 2.327644960  |
| C | 3.664128970  | 1.443875280  | 1.107655290  |
| C | -1.250145100 | 0.665696830  | -4.024520040 |
| C | -1.248409220 | -0.775569320 | -4.002375820 |
| C | -0.032914870 | 1.368113910  | -4.034963390 |
| C | -0.030477310 | -1.478737180 | -4.002366290 |
| C | 0.130666980  | -2.644885300 | -3.179652450 |
| C | -0.939968630 | -3.114099570 | -2.355429210 |
| C | -0.581848650 | -3.845804670 | -1.151469530 |
| C | 2.919529750  | -2.612404030 | -0.735533530 |
| C | 1.844107030  | -3.205978740 | -1.469553410 |
| C | 1.513350450  | -2.671834970 | -2.729138790 |
| C | 0.795412020  | -3.819914890 | -0.705641680 |
| C | -3.007751060 | 2.389527320  | -1.205623690 |
| C | -2.211512860 | 2.309612840  | -2.414751770 |
| C | -2.342740330 | 1.131651320  | -3.213323120 |
| C | -3.053574780 | -0.035128190 | -2.729128700 |
| C | -3.689080110 | -1.230916680 | -0.705671420 |
| C | -3.681587720 | -0.015765430 | -1.469571150 |
| C | -3.705208770 | 1.212409780  | -0.735609150 |
| C | -2.209919880 | -2.380850230 | -2.355413680 |
| C | -2.338903010 | -1.219076940 | -3.179664820 |
| C | -3.022619410 | -2.436486650 | -1.151451760 |
| C | -0.946370380 | 3.046265520  | -2.434860120 |
| C | 0.123687400  | 2.558775230  | -3.247924770 |
| C | -2.668300080 | 3.207418220  | -0.053447380 |
| C | -1.441033360 | 3.962974450  | -0.068714470 |
| C | -0.597871260 | 3.808888830  | -1.244305950 |
| C | -2.998375240 | 2.428284750  | 1.128232960  |
| C | -2.166085510 | 2.376609760  | 2.319246320  |
| C | -2.286110370 | 1.209925460  | 3.135549140  |
| C | -3.679066770 | -1.211480140 | 0.721296720  |
| C | -3.661876820 | 0.021442070  | 1.454840410  |
| C | -3.691669210 | 1.231379000  | 0.693800950  |
| C | -3.013788660 | 0.035016150  | 2.704210500  |
| C | 0.774238450  | 3.758471650  | -0.788117000 |
| C | 1.821678320  | 3.135703280  | -1.547932560 |
| C | 1.509193530  | 2.594441360  | -2.797129280 |
| C | 2.884750030  | 2.540012180  | -0.788093250 |
| C | 0.791391350  | 3.791906210  | 0.636029660  |
| C | 1.641164730  | 2.823149470  | 2.827632310  |
| C | 1.927480660  | 3.319058030  | 1.393500210  |
| C | 2.905129840  | 2.571674840  | 0.636054710  |
| C | -0.899838060 | 3.126511410  | 2.327596380  |
| C | -0.564823480 | 3.885262660  | 1.107578580  |
| C | 0.157955890  | 2.666603930  | 3.151963330  |
| C | -1.188670720 | -0.675013670 | 3.965067940  |

|    |              |              |             |
|----|--------------|--------------|-------------|
| C  | -1.184402290 | 0.764482810  | 3.938215430 |
| C  | 0.024902360  | 1.473586150  | 3.906867920 |
| C  | 0.026652900  | -1.376733990 | 3.965166840 |
| C  | -3.001022040 | -2.402313340 | 1.187374210 |
| C  | -2.174628640 | -2.318610930 | 2.379880770 |
| C  | -2.292780330 | -1.138406280 | 3.175995080 |
| C  | -0.563086740 | -3.809927190 | 1.187404920 |
| C  | -1.429824070 | -3.938966000 | 0.027257660 |
| C  | -2.679321180 | -3.217421150 | 0.027254150 |
| C  | 0.177402060  | -2.564579760 | 3.176044540 |
| C  | -0.903769300 | -3.052362760 | 2.379913870 |
| C  | 2.929185390  | -2.591170680 | 0.693876980 |
| C  | 1.554148860  | -2.602244160 | 2.704307460 |
| C  | 1.866367200  | -3.170184370 | 1.454862530 |
| C  | 0.807190960  | -3.801421230 | 0.721311920 |
| C  | 1.280611090  | 0.748631030  | 3.906883670 |
| C  | 1.271096580  | -0.653206990 | 3.938267720 |
| C  | 2.207757740  | -1.384524390 | 3.135599390 |
| C  | 3.158035840  | -0.697228250 | 2.319237150 |
| C  | 3.618970800  | -1.392239570 | 1.128282700 |
| C  | 2.360416570  | 4.069121150  | 3.058287540 |
| F  | 1.754686170  | 5.245109080  | 3.139042210 |
| F  | 3.681705270  | 4.132912580  | 3.138852410 |
| Cl | 2.159060130  | 3.719669670  | 5.707657710 |

**66-7**

|    |              |              |              |
|----|--------------|--------------|--------------|
| N  | 0.004478490  | 0.025910810  | 0.005390140  |
| Sc | 2.025225550  | 0.085714450  | 0.007932050  |
| Sc | -0.890992480 | -1.770219440 | 0.042144660  |
| Sc | -1.014578870 | 1.752489860  | -0.013473030 |
| C  | 3.616653550  | 1.430430320  | -1.198396250 |
| C  | 3.138115410  | 0.739540260  | -2.384812000 |
| C  | 2.182611590  | 1.416977150  | -3.207614480 |
| C  | 1.241912900  | 0.677550450  | -4.003787050 |
| C  | 1.246350290  | -0.727660860 | -3.983392220 |
| C  | 4.155477910  | 0.769175220  | -0.015131460 |
| C  | 4.138840690  | -0.679694470 | 0.006375810  |
| C  | 3.609923970  | -1.377744920 | -1.153708480 |
| C  | 3.140612870  | -0.729632830 | -2.365329310 |
| C  | 2.194791330  | -1.437793860 | -3.170577800 |
| C  | 2.187468940  | 1.497178290  | 3.146412890  |
| C  | 3.158195370  | 0.811631420  | 2.368936220  |
| C  | 3.616942860  | 1.461391610  | 1.150216630  |
| C  | -1.223818630 | 0.687155760  | -4.008946480 |
| C  | -1.219236350 | -0.753408460 | -3.990106700 |
| C  | -0.008822150 | 1.394110840  | -4.016743820 |
| C  | 0.000272300  | -1.452858010 | -3.977620830 |

|   |              |              |              |
|---|--------------|--------------|--------------|
| C | 0.157393240  | -2.622479700 | -3.157643900 |
| C | -0.919153810 | -3.096013850 | -2.344658720 |
| C | -0.573544900 | -3.834088680 | -1.135894320 |
| C | 2.912490180  | -2.558121380 | -0.688568310 |
| C | 1.851182860  | -3.166214680 | -1.435297090 |
| C | 1.539350140  | -2.649019780 | -2.701829790 |
| C | 0.798809800  | -3.780272340 | -0.675314320 |
| C | -3.026595950 | 2.417990880  | -1.216252030 |
| C | -2.205416470 | 2.332589150  | -2.415118720 |
| C | -2.324950890 | 1.149927620  | -3.208672900 |
| C | -3.039378620 | -0.023714770 | -2.734376040 |
| C | -3.694247610 | -1.218729980 | -0.712453970 |
| C | -3.672148050 | -0.009300250 | -1.478676350 |
| C | -3.690135210 | 1.222959190  | -0.745482330 |
| C | -2.187103260 | -2.359350130 | -2.350579010 |
| C | -2.318421380 | -1.202443250 | -3.180098210 |
| C | -2.998042100 | -2.410372870 | -1.148092460 |
| C | -0.939400070 | 3.071145910  | -2.427821550 |
| C | 0.140616100  | 2.587717880  | -3.231097200 |
| C | -2.704727670 | 3.237979880  | -0.055603720 |
| C | -1.453617760 | 3.960886680  | -0.068207010 |
| C | -0.596056830 | 3.830851940  | -1.235379640 |
| C | -3.030367850 | 2.451035910  | 1.125771150  |
| C | -2.207505480 | 2.397855170  | 2.327964880  |
| C | -2.309027850 | 1.233926750  | 3.154689850  |
| C | -3.687117830 | -1.198797330 | 0.716819730  |
| C | -3.663212180 | 0.030150010  | 1.452209650  |
| C | -3.687413770 | 1.242506270  | 0.684639960  |
| C | -3.017733260 | 0.048595660  | 2.702262130  |
| C | 0.778350030  | 3.821002960  | -0.779929020 |
| C | 1.831708930  | 3.190776460  | -1.521872790 |
| C | 1.520303510  | 2.635404460  | -2.775354620 |
| C | 2.899890300  | 2.609104000  | -0.763151920 |
| C | 0.778102100  | 3.837623890  | 0.646687960  |
| C | 1.512912600  | 2.679500960  | 2.657331280  |
| C | 1.831416600  | 3.225731530  | 1.403330100  |
| C | 2.899395870  | 2.625139510  | 0.667757370  |
| C | -0.940089840 | 3.126692200  | 2.307388510  |
| C | -0.594392710 | 3.865063990  | 1.104022930  |
| C | 0.136525630  | 2.650034460  | 3.117480110  |
| C | -1.201824330 | -0.656412380 | 3.989455970  |
| C | -1.221621970 | 0.801242670  | 3.987332180  |
| C | -0.008523820 | 1.497230640  | 3.954034420  |
| C | -0.012389860 | -1.374933070 | 4.033912740  |
| C | -3.002422700 | -2.382877270 | 1.185989820  |
| C | -2.182523070 | -2.295142170 | 2.382547930  |
| C | -2.296810670 | -1.115426350 | 3.174840570  |
| C | -0.569835040 | -3.806789350 | 1.211723710  |
| C | -1.429182120 | -3.940764540 | 0.038324720  |

|    |              |              |             |
|----|--------------|--------------|-------------|
| C  | -2.664031660 | -3.193489060 | 0.028904220 |
| C  | 0.155808730  | -2.506003690 | 3.190000330 |
| C  | -0.913794090 | -3.019115250 | 2.390605520 |
| C  | 2.905216390  | -2.532779080 | 0.738125370 |
| C  | 1.536768510  | -2.543924650 | 2.736523520 |
| C  | 1.848376940  | -3.121641180 | 1.498417950 |
| C  | 0.795840590  | -3.756433790 | 0.752324410 |
| C  | 1.277187650  | 0.840588500  | 4.057628610 |
| C  | 1.330054040  | -0.703394930 | 4.213377320 |
| C  | 2.233767970  | -1.378635770 | 3.214043700 |
| C  | 3.145575900  | -0.681886160 | 2.394506250 |
| C  | 3.601366710  | -1.348506650 | 1.184742080 |
| C  | 1.808019740  | -0.227250350 | 5.495731220 |
| F  | 1.005374560  | 0.035813440  | 6.513912800 |
| F  | 3.083567340  | 0.025247290  | 5.742998570 |
| Cl | 2.090686770  | -2.806732340 | 6.273330670 |

**Sc<sub>3</sub>N@C<sub>78</sub>**

|   |              |              |              |
|---|--------------|--------------|--------------|
| C | -0.794433280 | -0.560622900 | 3.823204090  |
| C | -1.219609480 | -1.810983840 | 3.286651710  |
| C | -0.280446790 | -2.776810640 | 2.797618500  |
| C | 1.107152060  | -2.435630110 | 2.901345280  |
| C | 1.532183780  | -1.185677920 | 3.438832300  |
| C | 0.592404730  | -0.208165540 | 3.901272010  |
| C | 2.086999250  | -2.871285220 | 1.930616390  |
| C | 3.184793300  | -1.918431600 | 1.945806060  |
| C | 2.784308300  | -0.821830140 | 2.812439260  |
| C | -1.831924260 | 0.417169940  | 3.579456880  |
| C | -2.958219100 | -0.270440220 | 2.968398210  |
| C | -2.530329550 | -1.634570010 | 2.700338540  |
| C | -3.696243420 | 0.421824940  | 1.941031480  |
| C | 3.822199980  | -1.596472450 | 0.692904530  |
| C | -3.272239930 | 1.764732660  | 1.580689640  |
| C | -3.446182400 | 1.917630720  | 0.153001980  |
| C | -3.871560330 | 0.667607060  | -0.384056140 |
| C | -3.971314330 | -0.284693860 | 0.700349650  |
| C | 4.023278200  | -0.192545050 | 0.370356070  |
| C | 3.802818250  | -0.028184800 | -1.049911090 |
| C | 3.377769030  | -1.278333820 | -1.587083350 |
| C | 3.325081650  | -2.243472910 | -0.511042160 |
| C | -2.673002570 | 2.843961820  | -0.619420370 |
| C | -2.372302980 | 2.464693240  | -1.968179740 |
| C | -2.796840000 | 1.214191900  | -2.504939630 |
| C | -3.545841740 | 0.275575440  | -1.723071940 |
| C | 3.389153340  | 1.217086950  | -1.626177570 |
| C | 2.550375870  | 1.143232430  | -2.785571920 |
| C | 2.125275570  | -0.107007420 | -3.322254990 |
| C | 2.516193730  | -1.351616580 | -2.729874410 |
| C | -1.145021370 | 2.852139900  | -2.628799940 |
| C | -0.863713100 | 1.866278840  | -3.660323520 |
| C | -1.840742670 | 0.800307770  | -3.508198240 |
| C | 1.534899320  | 2.132631190  | -3.073561220 |
| C | 0.511638140  | 1.497010830  | -3.888209390 |
| C | 0.837202890  | 0.081443830  | -3.952584110 |
| C | -2.192242580 | 2.485479890  | 2.230219050  |
| C | -1.439621850 | 1.781698560  | 3.273549570  |
| C | -0.680652530 | -3.620057120 | 1.750936200  |
| C | 0.939025990  | 1.146933110  | 3.799246440  |
| C | 1.626333900  | -3.572190140 | 0.745485550  |
| C | 1.526652750  | -3.390485550 | -1.738430480 |
| C | 3.037611070  | 0.579762510  | 2.529992670  |
| C | 3.418279860  | 2.176220350  | 0.653737090  |
| C | -1.820076800 | -3.803299700 | -0.267215240 |
| C | -2.851471960 | -2.370866680 | 1.490025190  |
| C | -3.604163450 | -1.666462280 | 0.446582530  |

|    |              |              |              |
|----|--------------|--------------|--------------|
| C  | 0.319008840  | -2.261909120 | -3.410637830 |
| C  | -3.430414100 | -2.059863290 | -0.915126290 |
| C  | 3.683770370  | 0.908486710  | 1.254949700  |
| C  | -1.907086270 | -2.807570880 | -2.516457940 |
| C  | 2.272181430  | -3.243861950 | -0.529593490 |
| C  | -1.766165820 | 3.675520150  | 0.053865710  |
| C  | -3.385886060 | -1.091121110 | -1.994569330 |
| C  | 3.256812860  | 2.327874480  | -0.780610360 |
| C  | 1.636698110  | -2.439328400 | -2.829022740 |
| C  | 0.273779570  | -4.029199190 | 0.737287360  |
| C  | -0.127254210 | 3.538433050  | -1.852448280 |
| C  | -1.538047540 | -0.614234390 | -3.636029340 |
| C  | 1.271516800  | 3.163071410  | -2.084694990 |
| C  | 2.165370130  | 1.538212040  | 3.129500030  |
| C  | -0.139588220 | -0.989601780 | -3.868098000 |
| C  | -2.396091700 | -1.532942390 | -2.959463040 |
| C  | -1.538896620 | 3.507261720  | 1.477163910  |
| C  | -1.968064630 | -3.426485310 | 1.109630130  |
| C  | 2.210697100  | 3.305269360  | -1.018341780 |
| C  | -0.076665180 | 2.140000870  | 3.501859140  |
| C  | -0.504496650 | 4.033432450  | -0.567266310 |
| C  | 1.923938430  | 2.806969730  | 2.503608350  |
| C  | -0.168908370 | 3.848967240  | 1.734319490  |
| C  | 0.169710060  | -3.857415060 | -1.714710320 |
| C  | 1.801832840  | 3.812351730  | 0.260333600  |
| C  | 0.551307240  | 3.175585510  | 2.731728720  |
| C  | -0.447417090 | -4.172051620 | -0.495293420 |
| C  | -2.540347120 | -3.130014330 | -1.264691050 |
| C  | 2.541160290  | 3.121176150  | 1.284094810  |
| C  | 0.464396180  | 4.171296900  | 0.482576150  |
| C  | -0.569620160 | -3.166431550 | -2.738477150 |
| N  | 0.000472490  | 0.000487870  | 0.000118860  |
| Sc | -1.612859310 | 0.024177170  | 1.194964790  |
| Sc | -0.084779590 | 0.823514840  | -1.829115080 |
| Sc | 1.706501390  | -0.847536410 | 0.633464570  |

**[6,6]-Sc<sub>3</sub>N@C<sub>80</sub>(CF<sub>2</sub>)**

|   |              |             |              |
|---|--------------|-------------|--------------|
| C | -3.610674870 | 2.233390230 | -0.716681880 |
| C | -3.611013410 | 2.233299240 | 0.715680610  |
| C | -4.047345390 | 0.930351870 | 1.160014770  |
| C | -4.323108950 | 0.127975780 | -0.000799840 |
| C | -4.046766350 | 0.930498270 | -1.161397740 |
| C | -3.546367120 | 0.336324640 | -2.360591520 |
| C | -2.657526960 | 1.111133460 | -3.196392570 |
| C | -2.159764550 | 2.364066410 | -2.670821240 |
| C | -2.620125450 | 2.955415960 | -1.440287370 |
| C | -1.701302920 | 3.768444900 | -0.720124890 |

|   |              |              |              |
|---|--------------|--------------|--------------|
| C | -1.701578800 | 3.768323020  | 0.720125960  |
| C | -2.620700130 | 2.955164100  | 1.439781200  |
| C | -2.160903540 | 2.363500860  | 2.670360990  |
| C | -2.658776320 | 1.110458860  | 3.195525290  |
| C | -3.547283670 | 0.335915160  | 2.359228150  |
| C | -3.390006900 | -1.084699430 | 2.364825350  |
| C | -3.688215320 | -1.892460420 | 1.215507240  |
| C | -4.116188760 | -1.284898490 | -0.000855270 |
| C | -3.687616250 | -1.892189380 | -1.217129060 |
| C | -3.389042930 | -1.084309260 | -2.366302130 |
| C | -2.309555140 | -1.717136800 | -3.092961560 |
| C | -1.369208610 | -0.955247650 | -3.861234020 |
| C | -1.581618460 | 0.480808170  | -3.966590240 |
| C | -0.421052790 | 1.358900560  | -3.850218540 |
| C | -0.798937840 | 2.520110100  | -3.088853720 |
| C | 0.140187140  | 3.292211800  | -2.331821740 |
| C | -0.340141920 | 3.942889420  | -1.163767810 |
| C | 0.496444330  | 4.077980360  | 0.000442670  |
| C | -0.340584270 | 3.942754840  | 1.164337000  |
| C | 0.139291810  | 3.291921100  | 2.332504270  |
| C | -0.800239540 | 2.519777970  | 3.089084860  |
| C | -0.422638980 | 1.358515100  | 3.850564730  |
| C | -1.583114780 | 0.480137660  | 3.966125980  |
| C | -1.370617330 | -0.955805210 | 3.860484300  |
| C | -2.310734640 | -1.717579770 | 3.091793210  |
| C | -1.946176070 | -2.915916250 | 2.373721650  |
| C | -2.791979240 | -3.018174180 | 1.220470490  |
| C | -2.304764250 | -3.582855070 | -0.000691260 |
| C | -2.791478300 | -3.017955720 | -1.221954200 |
| C | -1.945271770 | -2.915591300 | -2.374899960 |
| C | 1.493559080  | 2.846296850  | 2.360748280  |
| C | 1.892223700  | 1.644572580  | 3.041040650  |
| C | 0.932416610  | 0.867848740  | 3.749526840  |
| C | 1.114213960  | -0.536239110 | 3.773175520  |
| C | -0.020017750 | -1.432876230 | 3.810770880  |
| C | 0.356508310  | -2.638092500 | 3.118991140  |
| C | -0.595977640 | -3.379409260 | 2.348306300  |
| C | -0.148493140 | -4.036865570 | 1.166699190  |
| C | -0.989161540 | -4.126602170 | -0.000496220 |
| C | -0.148068620 | -4.036720940 | -1.167367480 |
| C | -0.595131280 | -3.379349160 | -2.349216920 |
| C | 0.357622510  | -2.637738110 | -3.119325120 |
| C | -0.018647280 | -1.432415150 | -3.811090720 |
| C | 1.115662860  | -0.535859120 | -3.773006520 |
| C | 0.933926930  | 0.868100860  | -3.749022020 |
| C | 1.893324010  | 1.644931740  | -3.039990310 |
| C | 1.494387370  | 2.846519990  | -2.359608190 |
| C | 2.317927580  | 2.995315430  | -1.213230640 |
| C | 1.818813270  | 3.560636870  | 0.000648650  |



|    |              |              |              |
|----|--------------|--------------|--------------|
| C  | 2.317488960  | 2.995210790  | 1.214647550  |
| C  | 3.303994750  | 1.948841220  | 1.212180890  |
| C  | 2.997714440  | 1.031265410  | 2.321909500  |
| C  | 3.154163370  | -0.416643330 | 2.313409790  |
| C  | 2.190945470  | -1.174339590 | 3.072578330  |
| C  | 1.709503430  | -2.480685820 | 2.679071470  |
| C  | 2.114948350  | -3.061743080 | 1.450566550  |
| C  | 1.205248040  | -3.867977220 | 0.720058780  |
| C  | 1.205511650  | -3.867919880 | -0.720198980 |
| C  | 2.115452290  | -3.061592310 | -1.450296380 |
| C  | 1.710477400  | -2.480442620 | -2.678892590 |
| C  | 2.192075990  | -1.174030250 | -3.072033930 |
| C  | 3.154992520  | -0.416393820 | -2.312374920 |
| C  | 2.998515090  | 1.031521280  | -2.320551050 |
| C  | 3.304435530  | 1.948942970  | -1.210582160 |
| C  | 4.008769230  | 1.662789270  | 0.000903940  |
| C  | 4.361187490  | -0.549759040 | 0.000720100  |
| C  | 3.748157270  | -1.128223390 | 1.179732550  |
| C  | 3.088819760  | -2.329477150 | 0.713716210  |
| C  | 3.089021050  | -2.329343670 | -0.712996180 |
| C  | 3.748597580  | -1.128085280 | -1.178587750 |
| Sc | -1.006863440 | 0.201272610  | 1.804439710  |
| Sc | -1.007090560 | 0.200425350  | -1.804498790 |
| Sc | 2.039510220  | 0.095995780  | 0.000190920  |
| N  | -0.026995260 | 0.134017330  | 0.000026940  |
| C  | 5.142026890  | 0.702153760  | 0.000978750  |
| F  | 5.935509760  | 0.828487730  | -1.107917570 |
| F  | 5.935293030  | 0.828226270  | 1.110042860  |

### Sc<sub>3</sub>N@C<sub>80</sub>

|   |              |              |              |
|---|--------------|--------------|--------------|
| C | -3.378994560 | 2.267691010  | -0.715245240 |
| C | -3.378967900 | 2.267495340  | 0.714447870  |
| C | -3.812644010 | 0.963106990  | 1.163205670  |
| C | -4.085971490 | 0.162625340  | -0.000627140 |
| C | -3.812709820 | 0.963458530  | -1.164154980 |
| C | -3.349461210 | 0.376182830  | -2.386383280 |
| C | -2.462868730 | 1.155436030  | -3.228174630 |
| C | -1.940310450 | 2.394720260  | -2.680714650 |
| C | -2.387213590 | 2.984483830  | -1.442698260 |
| C | -1.459800630 | 3.782764230  | -0.720234400 |
| C | -1.460063760 | 3.782821970  | 0.720500360  |
| C | -2.387634310 | 2.984311110  | 1.442446030  |
| C | -1.941496710 | 2.394586710  | 2.680871120  |
| C | -2.464262830 | 1.155180630  | 3.228405760  |
| C | -3.350555010 | 0.375772760  | 2.385931560  |
| C | -3.179279310 | -1.048570460 | 2.382560660  |
| C | -3.456716540 | -1.850423250 | 1.217502920  |

|   |              |              |              |
|---|--------------|--------------|--------------|
| C | -3.885048280 | -1.248056900 | -0.000785930 |
| C | -3.456356730 | -1.850271780 | -1.219080330 |
| C | -3.178686890 | -1.048291380 | -2.383919850 |
| C | -2.099811010 | -1.686020260 | -3.113018340 |
| C | -1.158758380 | -0.924340660 | -3.885776550 |
| C | -1.375314370 | 0.512985710  | -3.981037730 |
| C | -0.212968860 | 1.378449140  | -3.855109580 |
| C | -0.575393380 | 2.539628370  | -3.090385060 |
| C | 0.375537070  | 3.306931280  | -2.336798800 |
| C | -0.098259150 | 3.946687290  | -1.161533160 |
| C | 0.740743510  | 4.061980800  | 0.000597860  |
| C | -0.098637600 | 3.946648860  | 1.162366550  |
| C | 0.374772100  | 3.306655010  | 2.337714410  |
| C | -0.576506010 | 2.539239980  | 3.090775440  |
| C | -0.214110430 | 1.377827950  | 3.855222530  |
| C | -1.376344720 | 0.512399700  | 3.980104680  |
| C | -1.159175160 | -0.924621250 | 3.883669290  |
| C | -2.100283300 | -1.686253750 | 3.111262980  |
| C | -1.718305760 | -2.870354480 | 2.377877090  |
| C | -2.555008860 | -2.968209720 | 1.219470410  |
| C | -2.060138070 | -3.526003160 | -0.000693240 |
| C | -2.554488500 | -2.967952740 | -1.220962950 |
| C | -1.717539580 | -2.870088000 | -2.379237160 |
| C | 1.730877560  | 2.869873550  | 2.381465690  |
| C | 2.103438500  | 1.684775810  | 3.108104010  |
| C | 1.144464290  | 0.898772510  | 3.809182460  |
| C | 1.329493790  | -0.508589620 | 3.846555860  |
| C | 0.191806370  | -1.400460560 | 3.844455420  |
| C | 0.577695930  | -2.598968260 | 3.136791530  |
| C | -0.364526330 | -3.327434000 | 2.351790380  |
| C | 0.098597450  | -3.963295080 | 1.164846640  |
| C | -0.739612420 | -4.056042820 | -0.000524200 |
| C | 0.098913930  | -3.963324430 | -1.165628130 |
| C | -0.363770770 | -3.327631480 | -2.352804980 |
| C | 0.579202220  | -2.599080650 | -3.138234380 |
| C | 0.192367070  | -1.399805280 | -3.844427030 |
| C | 1.330331410  | -0.507954740 | -3.844970180 |
| C | 1.145517040  | 0.899377930  | -3.807772700 |
| C | 2.104195910  | 1.685094800  | -3.106139980 |
| C | 1.731680620  | 2.870184610  | -2.379844680 |
| C | 2.560266540  | 2.969064740  | -1.215611410 |
| C | 2.060458460  | 3.525797570  | 0.000919460  |
| C | 2.559764430  | 2.968815730  | 1.217518470  |
| C | 3.456078050  | 1.836514580  | 1.208678860  |
| C | 3.160410520  | 1.039852200  | 2.379995430  |
| C | 3.316956470  | -0.376892320 | 2.364467220  |
| C | 2.403726040  | -1.150856300 | 3.144117390  |
| C | 1.934269900  | -2.441328730 | 2.706144830  |
| C | 2.364312930  | -2.987387660 | 1.462196240  |

|    |              |              |              |
|----|--------------|--------------|--------------|
| C  | 1.455086370  | -3.787896800 | 0.721333320  |
| C  | 1.455335430  | -3.787867390 | -0.721306530 |
| C  | 2.365062240  | -2.987596390 | -1.461518510 |
| C  | 1.935304090  | -2.441481670 | -2.705477720 |
| C  | 2.404394150  | -1.150441010 | -3.142392120 |
| C  | 3.318161380  | -0.376811700 | -2.362627580 |
| C  | 3.160901350  | 1.039936560  | -2.377504730 |
| C  | 3.456676470  | 1.836875790  | -1.206501350 |
| C  | 3.970690320  | 1.255976040  | 0.001205630  |
| C  | 4.263635750  | -0.174739280 | 0.000988530  |
| C  | 3.881613040  | -0.968184230 | 1.171699440  |
| C  | 3.332520470  | -2.224065550 | 0.717153680  |
| C  | 3.333400220  | -2.224305850 | -0.716182330 |
| C  | 3.883657270  | -0.968661010 | -1.170480790 |
| Sc | -0.983594660 | 0.184521890  | 1.771694080  |
| Sc | -0.979891960 | 0.178957050  | -1.775111650 |
| Sc | 2.026100520  | -0.089537670 | -0.004027100 |
| N  | 0.003064810  | 0.075635240  | -0.000578420 |
